# Supplementary material for: Health effects following the Eyjafjallajökull volcanic eruption: a cohort study
Source: PubMed Central journal article supplement — BMJ Open. 2012 Nov 7;2(6):e001851. doi: 10.1136/bmjopen-2012-001851 (PMC3533043; doi:10.1136/bmjopen-2012-001851), 2012-11-07
Supplement: bmjopen-2012-001851.draft_revisions.pdf [file bmjopen-2012-001851.draft_revisions.pdf]

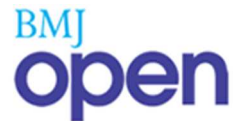

## Health effects following the Eyjafjallajökull volcanic eruption – a population-based study

|                                 |                                                                                                                                                                                                                                                                                                                                                                                                                                                                                                                                                                                                                                                                                                                                                                                                                                                                                                                                                                                                                                                                                                                                                                                         |
|---------------------------------|-----------------------------------------------------------------------------------------------------------------------------------------------------------------------------------------------------------------------------------------------------------------------------------------------------------------------------------------------------------------------------------------------------------------------------------------------------------------------------------------------------------------------------------------------------------------------------------------------------------------------------------------------------------------------------------------------------------------------------------------------------------------------------------------------------------------------------------------------------------------------------------------------------------------------------------------------------------------------------------------------------------------------------------------------------------------------------------------------------------------------------------------------------------------------------------------|
| Journal:                        | <i>BMJ Open</i>                                                                                                                                                                                                                                                                                                                                                                                                                                                                                                                                                                                                                                                                                                                                                                                                                                                                                                                                                                                                                                                                                                                                                                         |
| Manuscript ID:                  | bmjopen-2012-001851                                                                                                                                                                                                                                                                                                                                                                                                                                                                                                                                                                                                                                                                                                                                                                                                                                                                                                                                                                                                                                                                                                                                                                     |
| Article Type:                   | Research                                                                                                                                                                                                                                                                                                                                                                                                                                                                                                                                                                                                                                                                                                                                                                                                                                                                                                                                                                                                                                                                                                                                                                                |
| Date Submitted by the Author:   | 22-Jul-2012                                                                                                                                                                                                                                                                                                                                                                                                                                                                                                                                                                                                                                                                                                                                                                                                                                                                                                                                                                                                                                                                                                                                                                             |
| Complete List of Authors:       | <p>Carlsen, Hanne Krage; University of Iceland, Centre of Public Health; Umeå University , Occupational and Environmental Health</p> <p>Hauksdóttir, Arna; University of Iceland, Centre of Public Health Sciences</p> <p>Valdimarsdóttir, Unnur; University of Iceland, Centre of Public Health Sciences</p> <p>Gislason, Thorarinn; National University Hospital of Iceland, Department of Respiratory Medicine and Sleep; University of Iceland, Faculty of Medicine</p> <p>Einarsdóttir, Gunnlaug; Environmental Agency of Iceland, Runólfsson, Halldór; MAST – Icelandic Food and Veterinary Authority, Briem, Haraldur; Directorate of Health, Centre for Health Security and Communicable Disease Control</p> <p>Finnbjörnsdóttir, Ragnhildur; University of Iceland, Centre of Public Health Sciences</p> <p>Guðmundsson, Sigurður; University of Iceland, School of Health Sciences</p> <p>Kolbeinsson, Thórir; The Health Care Institution of South Iceland, Thorsteinsson, Throstur; University of Iceland, Environment and Natural Resources &amp; Institute of Earth Sciences</p> <p>Pétursdóttir, Guðrún; University of Iceland, Institute for Sustainability Studies</p> |
| <b>Primary Subject Heading</b>: | Public health                                                                                                                                                                                                                                                                                                                                                                                                                                                                                                                                                                                                                                                                                                                                                                                                                                                                                                                                                                                                                                                                                                                                                                           |
| Secondary Subject Heading:      | Epidemiology                                                                                                                                                                                                                                                                                                                                                                                                                                                                                                                                                                                                                                                                                                                                                                                                                                                                                                                                                                                                                                                                                                                                                                            |
| Keywords:                       | EPIDEMIOLOGY, PUBLIC HEALTH, Epidemiology < THORACIC MEDICINE                                                                                                                                                                                                                                                                                                                                                                                                                                                                                                                                                                                                                                                                                                                                                                                                                                                                                                                                                                                                                                                                                                                           |
|                                 |                                                                                                                                                                                                                                                                                                                                                                                                                                                                                                                                                                                                                                                                                                                                                                                                                                                                                                                                                                                                                                                                                                                                                                                         |

SCHOLARONE™  
Manuscripts

# Health effects following the Eyjafjallajökull volcanic eruption

## – a population-based study

Hanne Krage Carlsen, Arna Hauksdóttir, Unnur Anna Valdimarsdóttir, Þórarinn Gíslason,  
Gunnlaug Einarsdóttir, Halldór Runólfsson, Haraldur Briem, Ragnhildur Finnbjörnsdóttir, Sigurður  
Guðmundsson, Þórir Björn Kolbeinsson, Þróstur Þorsteinsson and Guðrún Pétursdóttir

Centre of Public Health Sciences, University of Iceland, 101 Reykjavík, Iceland & Department of  
Occupational and Environmental Medicine, University of Umeå, Sweden, 901 87 Umeå, Sweden

**Hanne Krage Carlsen\* PhD candidate** Centre of Public Health Sciences, University of Iceland,  
101 Reykjavík, Iceland **Arna Hauksdóttir \* assistant professor** Centre of Public Health Sciences,  
University of Iceland, 101 Reykjavík, Iceland **Unnur Anna Valdimarsdóttir associate professor**  
Faculty of Medicine, School of Health Sciences, University of Iceland, 102 Reykjavík, Iceland  
**Þórarinn (Thorarinn) Gíslason professor, MD** The Environment Agency of Iceland, 108  
Reykjavík, Iceland **Gunnlaugur Einarsdóttir director** MAST – Icelandic Food and Veterinary  
Authority, 800 Selfoss, Iceland **Halldór Runólfsson Chief veterinarian** The Directorate of Health,  
101 Reykjavík, Iceland **Haraldur Briem Chief Epidemiologist** Centre of Public Health Sciences,  
University of Iceland, 101 Reykjavík, Iceland **Ragnhildur Finnbjörnsdóttir PhD candidate**  
School of Health Sciences, University of Iceland, Vatnsmyrarvegur 16, 102 Reykjavík, Iceland  
**Sigurður Guðmundsson professor Dean** The Health Care Institution of South Iceland, 800  
Selfoss, Iceland **Þórir (Thorir) Björn Kolbeinsson MD Head physician** Environment and Natural  
Resources & Institute of Earth Sciences, University of Iceland, 101 Reykjavík, Iceland **Þróstur**  
**(Throstur) Þorsteinsson (Thorsteinsson) associate professor** Institute for Sustainability Studies,  
University of Iceland, 101 Reykjavík, Iceland **Guðrún Pétursdóttir associate professor, Director**

1  
2  
3  
4  
5 \*Hanne Krage Carlsen and Arna Hauksdóttir share responsibility as first authors  
6  
7  
8  
9  
10

11 Correspondence to:

12  
13 G Pétursdóttir [guðrun@hi.is](mailto:guðrun@hi.is)  
14  
15

16  
17 Institute for Sustainability Studies, University of Iceland,  
18

19 Gimli v/Sæmundargötu,  
20  
21

22 101 Reykjavík, Iceland  
23  
24

25 Telephone number: +354 4724  
26  
27

28 Cell: +354 820 05 75  
29  
30

31 Fax: +354 552 13 31  
32  
33  
34  
35  
36  
37  
38  
39  
40  
41  
42  
43  
44  
45  
46  
47  
48  
49  
50  
51  
52  
53  
54  
55  
56  
57  
58  
59  
60

**Abstract**

**Objective** To determine if exposure to a volcanic eruption was associated with increased rates of physical and mental symptoms.

**Design** Cohort, with non-exposed control group.

**Setting** The Icelandic volcano Eyjafjallajökull exposed residents in southern Iceland to ash fall. This study was conducted winter 2010-2011, ca. six months after the eruption.

**Participants** Adult (18-80years of age) eruption-exposed South Icelanders (n=1148) and a control population of residents of Skagafjörður, North Iceland (n=510). The participation rate was 72%.

**Main Outcome Measures** Physical symptoms in the previous year (chronic), in the previous month (recent), General Health Questionnaire (GHQ-12) measured psychological morbidity.

**Results** The risk of symptoms during the last month was higher in the exposed population; tightness in the chest (odds ratio (OR) 2.5; 95% CI, 1.1-5.8), cough (OR, 2.6; 95% CI, 1.7-3.9), phlegm (OR, 2.1; 95% CI, 1.3-3.2), eye irritation (OR, 2.9; 95% CI, 2.0-4.1), and psychological morbidity symptoms (OR, 1.3; 95% CI, 1.0-1.7). The risk of respiratory symptoms during the last 12 months was also higher in the exposed population; cough (OR, 2.2; 95% CI, 1.6-2.9), phlegm (OR, 1.6; 95% CI, 1.1-2.3), although the risk of underlying asthma and heart disease was similar. Twice as many in the exposed population had two or more symptoms from nose, eyes or upper-respiratory tract (24% vs 13%,  $p<0.001$ ); this group also had increased risk of psychological morbidity (OR, 4.69; 95% CI, 3.39-6.50) compared with individuals with no symptoms. Most symptoms exhibited a dose-response pattern within the exposed population.

**Conclusions** Six to nine months after the Eyjafjallajökull eruption, residents living in the exposed area, particularly those closest to the volcano, had increased risk of respiratory symptoms. A portion of the exposed population presented with multiple symptoms and may be at risk for long-term physical and psychological morbidity. Studies of long-term consequences are therefore warranted.

## Introduction

Throughout history, human societies have been exposed to volcanic eruptions and earthquakes which are responsible for many deaths every year worldwide.<sup>1</sup> Accurate information on mortality and long-term health consequences of natural disasters is instrumental to strengthen risk management and decrease their health impact.<sup>2</sup>

The eruption of the Eyjafjallajökull volcano in Iceland, from April 14<sup>th</sup> to May 20<sup>th</sup> 2010, made headlines worldwide, not least because of extensive effects on international flight traffic. Direct ash fall from the eruption was estimated at around 250 million tons, with rural regions in Iceland south and south-east of the volcano most severely affected.<sup>3,4</sup> Ash fall was continuous for about 6 weeks, and two years later ash is still re-suspended in the area. The fresh ash particles contained acids, and about 20% by mass were small enough to enter the lower airways.<sup>5</sup> A study of the most exposed population was conducted immediately after the eruption ended. Participants were examined by a physician, standardized spirometry was performed before and after bronchodilator usage, questionnaires about mental and physical health were applied. Ash exposure was associated with high rates of eye- and upper airway irritation (25% and 50% respectively), and exacerbation of pre-existing asthma but did not contribute to serious health problems or impair respiratory function compared to controls. 39% showed symptoms of psychological morbidity.<sup>6</sup> Meanwhile, the impact on long-term health of the residents remains to be explored.

Health effects of long-term exposure to a volcanic eruption are important both from a scientific and health care standpoint.<sup>7</sup> Iceland's population-based registries and strong infrastructure present opportunity to study such health impacts, particularly in terms of long-term follow-up.

Previous studies on volcanic ash exposure and health have shown increased respiratory morbidity

1 and asthma attacks,<sup>8</sup> and increased irritation of the respiratory tract from short term exposure to  
2 volcanic gases and ash.<sup>9</sup> Long-term exposure to sulphuric gases (often emitted in volcanic eruptions)  
3 are associated with increased prevalence of chronic bronchitis and cardio-respiratory symptoms.<sup>10,11</sup>  
4  
5 In addition to direct physical health hazards, experiencing floods, lava and gas flows and being  
6 exposed to prolonged ash suspension can be a threat to mental health. Stress levels may increase  
7 dramatically and contribute to long-term psychological morbidity such as post traumatic stress  
8 syndrom or depression.<sup>12,13</sup>  
9  
10

11 Utilizing the Icelandic population-based registers to identify all residents living in the vicinity of  
12 Eyjafjallajökull, the aim of this study was to investigate their self-reported physical and mental  
13 health six to nine months after the volcanic eruption. We hypothesized that residents of the  
14 Eyjafjallajökull area, particularly those most exposed, would be at increased risk of physical and  
15 psychological symptoms compared to an non-exposed population in North Iceland.  
16  
17  
18  
19  
20  
21  
22  
23  
24  
25  
26  
27  
28  
29  
30  
31  
32

## 33 **Methods**

### 34 Study area

35  
36  
37  
38  
39 The exposed area in South Iceland is mostly farmland with a few villages. The area contains several  
40 volcanic systems that have been active in the past decades.<sup>14</sup> Almost from the onset of the eruption,  
41 the Environment Agency of Iceland monitored concentrations of inhalable particulate matter (PM<sub>10</sub>)  
42 in up to three locations in the study area. The official health limit for air pollution, 50 µg/m<sup>3</sup> daily  
43 average, was surpassed more than half the time between May 7<sup>th</sup> and June 6<sup>th</sup> 2010, when air quality  
44 was continuously monitored in the most severely affected areas.<sup>4</sup>  
45  
46  
47  
48  
49  
50  
51  
52

53 The exposed area was divided into a low, medium and high exposure region (Supplement A). Based  
54 on satellite images of the eruption plume (coarse time resolution), information about the emission  
55 intensity<sup>2</sup> and observations of ash deposits on the ground.<sup>5,15</sup> Models calculated with FLEXPART  
56  
57  
58  
59  
60

1 show similar ash deposits, ranging from approximately 1000 g/m<sup>2</sup> in the region just south of the  
2 volcano, to about 200 g/m<sup>2</sup> near Vík some 50 km further east.<sup>4</sup>  
3  
4  
5

6 The prevailing wind was from the north-west during the eruption, so the worst ash fall was south  
7 and east of the volcano. While ash deposits were relatively low west of the volcano, the volcano  
8 was in full view and thus residents here were more visually exposed than in other regions. The  
9 lowland regions south and west of the volcano are prone to flooding and some residents were  
10 evacuated because of glacial outburst floods in the first days of the eruption.  
11  
12  
13  
14  
15  
16  
17  
18  
19  
20  
21

### 22 Study population

23  
24 The study population included all residents in the municipalities closest to Eyjafjallajökull volcano  
25 (pre-defined by postal codes), identified in the population-based registry (Registers Iceland). Most  
26 live in farmlands (n=1207), the rest in small townships (N=859).<sup>16</sup> We identified 1615 inhabitants  
27 who were 18-80 years of age, lived in the exposed area during the eruption, could be reached and  
28 spoke Icelandic fluently. A sample of 697 demographically matched (age, gender, urban/rural  
29 habitation) residents from a non-exposed area in Northern Iceland was included as control group.  
30  
31  
32  
33  
34  
35  
36  
37  
38  
39  
40  
41

### 42 Data collection

43  
44 Initially, all participants in the exposed group received an information and invitation letter. Some  
45 days after the letters were sent the recipients were contacted by telephone and asked whether they  
46 were willing to participate, and if so, whether they preferred to reply on paper or online.  
47  
48  
49

50 Subsequently, questionnaires or email invitations were sent and a week later a combined thank-  
51 you/reminder card was sent by post or e-mail. If needed, the participants were reminded again by  
52 phone. A similar protocol was used for the control group, except the introductory letter stated that a  
53 questionnaire would be sent a few days later, unless participation was declined.  
54  
55  
56  
57  
58  
59  
60

1 Questionnaires were sent to the exposed population between November 19<sup>th</sup> and December 28<sup>th</sup>  
2  
3  
4 2010 (six to seven months after the eruption ended) and the last replies were received in March  
5  
6 2011. The control group received questionnaires between January 26<sup>th</sup> and February 4<sup>th</sup> 2011, the  
7  
8 last replies were received in April 2011.  
9

10  
11 The questionnaires contained no information revealing the identity of the respondent, instead, they  
12  
13 had a running number which could be linked to the person's ID number through a list which was  
14  
15 kept separately and securely to enable follow-up. Returned questionnaires lacking basic  
16  
17 demographic information about gender, age and education were considered invalid and excluded.  
18  
19

## 20 21 22 23 24 Questionnaires

25  
26  
27 We used standard questions from the screening part of the European Community Respiratory  
28  
29 Health questionnaire<sup>16</sup> and assessed underlying disease by asking "Has a medical doctor ever told  
30  
31 you that you had the following diseases: asthma, heart disease, emphysema, chronic bronchitis and  
32  
33 chronic obstructive pulmonary disease (COPD)" with the response alternatives "Yes" or "No" to  
34  
35 each option. To assess recent symptoms, we asked "Have the following symptoms disrupted your  
36  
37 daily activities during the previous month?" followed by a list of various symptoms from e.g. the  
38  
39 respiratory system, skin or eyes or relating to pain. We also asked about smoking "Have you ever  
40  
41 smoked", "Yes" or "No", and "Have you smoked during the last month", "Yes" or "No". Questions  
42  
43 on regular use of medication were "Do you take medication regularly, that is, once per week or  
44  
45 more often?" followed by listing asthma medication, analgesics, blood-pressure-lowering  
46  
47 medication and sleep medication/anti-depressants/tranquillizers/medication for other mental health  
48  
49 problems. Current psychological morbidity was evaluated from the General Health Questionnaire-  
50  
51 12-item (GHQ-12) using a binary cut-off score of >2.<sup>18,19</sup>  
52  
53  
54  
55  
56  
57  
58  
59  
60



### Database & coding

The online survey was built with LimeSurvey.<sup>20</sup> Participants replying online accessed the survey using a unique identifier sent to them by email. Questionnaire replies on paper were entered into LimeSurvey according to uniform guidelines set by the researchers.

### Statistical analysis

We first calculated descriptive statistics, contrasting background characteristics in the exposed and non-exposed population using  $\chi^2$  – tests ( $p$  applies to all categories within demographic characteristics). Logistic regression was used to determine odds ratios (ORs) associated with residence in a) the exposed and non-exposed regions and b) the low, medium or high exposure areas within the exposed region. All models were adjusted for age, gender, smoking status (never, former and current) and education level, odds ratios and 95% confidence intervals (CI) were calculated from the outputs. A CI not including 1.0 or a  $p$ -value of 0.05 or less was considered statistically significant. A Venn diagram was drawn to show the interrelationship between key nasal, eye or upper respiratory symptoms (cough and/or phlegm without having a cold, eye irritation or itch, and sneeze, stuffed or runny nose). Demographic characteristics, risk factors and comorbidities of those reporting multiple symptoms were explored using  $\chi^2$  – tests and logistic.

IBM SPSS 19<sup>21</sup> was used for data analysis. Individuals who had not replied to all relevant questions were excluded from the regression models.

## Results

Valid questionnaires were obtained from 1148 of 1615 (71%) in the exposed population and 510 of 697 (73%) in the non-exposed population. More in the exposed population could not be reached or found (10.8% vs 7.2%;  $P=0.005$ ), or refused to participate (17.8% vs 14.6%;  $P=0.069$ ). The exposed and non-exposed participants had similar demographic characteristics; age, education levels, and occupational, marital and financial status (Table 1).

### Analysis 1: Exposed vs. non-exposed

Respiratory symptoms such as waking up with a feeling of tightness in the chest, breathlessness, cough and phlegm in the last 12 months were more prevalent in the exposed population. When adjusting for sex, age, education and smoking status, symptom risks measured higher in the exposed population were; tightness in chest (OR, 2.0; 95% CI, 1.3-3.0), coughing without a cold (OR, 2.2, CI, 1.6-2.9) and having physician-diagnosed asthma (OR, 3.9, CI, 1.2-12.5) or chronic bronchitis, OR, 1.9 (95% CI, 1.1-3.1) (Table 2).

The risk of recent (during the last month), bothersome physical symptoms was increased in the exposed population; these were shortness of breath, OR, 2.1 (95% CI, 1.2-3.6), cough (OR, 2.6; 95% 1.7-3.9), phlegm (OR, 2.1; 95% CI, 1.3-3.2), and eye irritation (OR, 2.9; 95% CI, 1.8-4.5). Back pain, myalgia and insomnia were less prevalent in the exposed population. The exposed population had a marginally higher risk of recent, psychological morbidity (OR, 1.3; 95% CI, 1.0-1.7), blood pressure lowering medication use (1.3, 95% CI, 1.0-1.7), but lower risk of use of analgesics (OR, 0.7; 95% CI, 0.5-1.0) (Table 3).

### Analysis 2: low, medium and high exposure

1 The prevalence of most respiratory symptoms during the last year increased with ash exposure.  
2  
3  
4 After adjusting for gender, age, education and smoking, the risk of waking up with a feeling of  
5  
6 tightness in the chest was increased in the medium- and high exposure regions, OR, 2.1 (95% CI,  
7  
8 1.0-4.2) and OR, 3.1 (95% CI, 1.5-6.6) respectively. Chronic phlegm production was only increased  
9  
10 in the high exposure region, OR, 2.3 (95% CI, 1.2-4.4) (Table 4).  
11

12  
13 The risk of recent symptoms increased with exposure; cough (medium exposure OR, 3.6; 95% CI,  
14  
15 1.6-8.1; high exposure OR, 4.5; 95% CI, 2.0-10.2), phlegm (medium exposure OR, 4.2; 95% CI,  
16  
17 1.5-11.8, high exposure OR, 6.0; 95% CI, 2.1-17.1) insomnia (medium exposure 2.4, 95% CI, 1.2-  
18  
19 5.0, high exposure OR, 2.8, 95% CI, 1.3-5.9), (Table 5). No significant associations were observed  
20  
21 between level of exposure and feeling of tightness in the chest, psychological morbidity, use of  
22  
23 analgesic- and blood-pressure lowering drugs, or physician-diagnosed disease, though a non-  
24  
25 significant trend was observed with some outcomes.  
26  
27  
28  
29  
30  
31  
32

### 33 **Analysis 3: Multiple symptoms**

34  
35 A subgroup within both populations reported multiple symptoms from nose, eyes or upper  
36  
37 respiratory organs. The proportion reporting two or more symptoms was proportionally larger in the  
38  
39 exposed population than the non-exposed (23.8% vs 12.9%) (Supplement B). Within the exposed  
40  
41 population the proportion was 13.3% in the low-exposure area, 24.7% in the medium exposure area,  
42  
43 and 26.7% in the high-exposure area. In the exposed area, those who reported multiple key  
44  
45 symptoms were more likely to be female (58.1% female vs 41.9% male,  $p < 0.015$ ), and have asthma,  
46  
47 compared to those with no symptoms (26.9% asthma vs 3.4% asthma,  $p < 0.001$ ).  
48  
49

50  
51 Analyzing the association between exposure and psychological morbidity and adjusting for multiple  
52  
53 symptoms, we found that having multiple symptoms was associated with psychological  
54  
55 morbidity, OR, 4.69 (95% CI, 3.39-6.50), irrespective of exposure level.  
56  
57  
58  
59  
60

1  
2  
3  
4  
5  
6  
7  
8  
9  
10  
11  
12  
13  
14  
15  
16  
17  
18  
19  
20  
21  
22  
23  
24  
25  
26  
27  
28  
29  
30  
31  
32  
33  
34  
35  
36  
37  
38  
39  
40  
41  
42  
43  
44  
45  
46  
47  
48  
49  
50  
51  
52  
53  
54  
55  
56  
57  
58  
59  
60

For peer review only

## Discussion

Our study found that six to nine months after the Eyjafjallajökull eruption ended the participants from exposed areas reported increased wheezing, cough and phlegm, recent eye and skin irritation. Participants from medium and high exposure regions experienced significantly higher rates of upper respiratory, skin and eye irritation symptoms than those from the low exposure region. This suggests a dose-dependent relationship of the Eyjafjallajökull ash exposure on respiratory health, however, respiratory function was not investigated in this study. Many of the recent physical and mental symptoms were only marginally more prevalent in the high than the medium exposure area, indicating that there is a threshold beyond which additional exposure does not result in increased morbidity. Reporting two or more key respiratory symptoms was more common in the exposed population. Compared to the non-exposed, the exposed population reported only marginally higher prevalence of psychological morbidity. However, psychological morbidity was reported to be much higher in the subgroup reporting two or more symptoms, indicating that those with many symptoms represent a more sensitive subgroup within the population which should be especially targeted in preventive actions.

The main strengths of this study, our ability to identify the whole population experiencing a volcanic eruption as well as the high participation rate, both minimize the risk of selection bias. In addition, the internal response rate (answers to specific items) was high. The exposed and non-exposed populations were demographically similar and adjustment for age, gender and education further reduces the risk of confounding.

Regarding the limitations of the study, we have no information on the health status of the two populations before the eruption nor the health status of non-respondents, and cannot exclude the possibility that the groups may have differed before the eruption. Although the study benefits overall from high response rate, we have limited information on non-responders and therefore it remains uncertain to what extent, if at all, attrition affects our comparison across exposure areas.

1  
2 Another limitation of the study is that all symptoms are self-reported which may confer  
3  
4 misclassification of symptoms. However, it is unlikely that this bias differs across exposure  
5  
6 categories. Classification of exposure areas (low, medium, high), which was based on estimated ash  
7  
8 fall, may be imprecise and actual ash exposure may also vary within the exposure areas due to local  
9  
10 weather conditions, terrain, or housing quality. Yet, if our classification is unclear or erroneous, this  
11  
12 would reasonably result in compromised dose-dependent effects seen in our study and rather  
13  
14 decrease the measured effects. It is also possible that exposures other than ash fall, e.g. noise,  
15  
16 visibility, or living in lowlands exposed to lava and glacial outburst floods, are significant  
17  
18 contributors to the psychological morbidity which we observed in this study.  
19  
20

21  
22 The exposed region is varied with respect to population density and occupation; the high exposure  
23  
24 area has a higher proportion of farmers, who spend more time outside, which may exaggerate the  
25  
26 observed difference between the medium- and low exposure areas. On the other hand, residents of  
27  
28 the high exposure area may have been more vigilant in avoiding exposure, which would reduce the  
29  
30 difference between the exposure areas. Data collection for the exposed group went on in November-  
31  
32 December, and January-February for the non-exposed group, which may induce bias with respect to  
33  
34 respiratory symptoms which may be more common in January-February. However, this would  
35  
36 attenuate the observed difference in respiratory symptoms.  
37  
38

39  
40 Before the eruption of Eyjafjallajökull, dust storms frequently compromised air quality in the  
41  
42 exposed area,<sup>22,23,24</sup> but during and after the eruption, air quality severely deteriorated.<sup>4,5</sup> Our  
43  
44 findings of high rates of cough and eye irritation following exposure to volcanic ash are consistent  
45  
46 with other studies, for example the Mount St. Helens eruption, where the number of emergency  
47  
48 room visits for respiratory conditions increased three to five-fold.<sup>25</sup> Eye irritation was also more  
49  
50 common in loggers exposed to Mount St. Helens ash, and the amount of eye mucus seemed to be  
51  
52 dose-dependent on the ash density.<sup>26</sup>  
53  
54

55  
56  
57 Dose response and threshold effects of urban-type airborne particles on health have been explored  
58  
59  
60

1  
2 in epidemiological studies,<sup>27</sup> but rarely in humans exposed to volcanic ash. A Japanese study of  
3  
4 asthma treatment and volcanic ash exposure found worsening of symptoms in asthmatics in areas  
5  
6 with more than 100 g/m<sup>2</sup> ash, but not in areas with less ash fall.<sup>28</sup> Dose response effects have been  
7  
8 found in a study of rats exposed to high doses of volcanic ash from Mount St. Helens for up to two  
9  
10 years developed lung lesions, but only minimal effects were found in those exposed to lower  
11  
12 doses.<sup>29</sup> Other animal studies with shorter follow up or other ash types did not show the same  
13  
14 results highlighting the need for long follow up and recognition of the variability in morbidity-  
15  
16 inducing properties of volcanic ash.<sup>8</sup>

17  
18  
19  
20 The psychological morbidity rates found in this study (20-26%) were lower than in the survey of the  
21  
22 most exposed area at the eruptions' end (39%).<sup>6</sup> This may indicate some adaptation in the residents  
23  
24 following the eruption. Although a disaster with more dramatic consequences, a similar trend was  
25  
26 found in a Japanese study of evacuees from a volcanic area where 66.1% showed signs of  
27  
28 psychological morbidity (GHQ-30) half a year after evacuation, while four years later the rate had  
29  
30 fallen to 45.6%.<sup>13</sup> In our study, psychological morbidity was most common in the high exposure  
31  
32 group, as was regular intake of medicines for depression, anxiety, sleep problems or other mental  
33  
34 symptoms. Dose-response trends were found between psychological morbidity and exposure to the  
35  
36 Mount St. Helens eruption,<sup>12</sup> indicating possible long-term risk of further psychological morbidity  
37  
38 in the high exposure group.

39  
40  
41  
42 The results from this study has implications for planners and authorities, as it indicates risk groups  
43  
44 particularly susceptible to adverse reactions after exposure to volcanic ash. Also, the study design  
45  
46 and registration of the participants enables that the exposed group may be followed up, both directly  
47  
48 in a new questionnaire study, as well as in hospital, medicines and mortality registers.

## 58 **Conclusions**

1  
2 In this population-based study we documented high prevalences of respiratory symptoms six to nine  
3  
4 months following the Eyjafjallajökull eruption, especially among those most exposed. These  
5  
6 findings lend important evidence for lasting health effects among those exposed to volcanic  
7  
8 eruptions and give incentive for further studies, e.g. on predictive factors for morbidity, health of  
9  
10 children and long-term follow-up. Important knowledge might be gained from such studies,  
11  
12 enabling better options for decreasing morbidity among those who experiencing volcanic eruptions  
13  
14 and increase their long-term well-being.  
15  
16  
17  
18  
19  
20  
21  
22  
23  
24  
25  
26  
27  
28  
29  
30  
31  
32  
33  
34  
35  
36  
37  
38  
39  
40  
41  
42  
43  
44  
45  
46  
47  
48  
49  
50  
51  
52  
53  
54  
55  
56  
57  
58  
59  
60



## References

1. Guha-Sapir D, Vos F, Below R. Annual disaster statistical review: Numbers and trends 2010. Louvain-la-Neuve (Belgium): Centre for Research on the Epidemiology of Disasters (CRED): 2011 p. 50. Report No. 280. [2012 March 27]  
[http://www.cred.be/sites/default/files/ADSR\\_2010.pdf](http://www.cred.be/sites/default/files/ADSR_2010.pdf)
2. Lancet. Natural disasters—taking a longer term view. *Lancet*. 2011; 377(9764):439.
3. Stohl A, Prata AJ, Eckhardt S, Clarisse L, Durant A, Henne S, et al. Determination of time- and height-resolved volcanic ash emissions for quantitative ash dispersion modeling: The 2010 Eyjafjallajökull eruption. *Atmos Chem Phys Discuss*. 2011;11(2):5541-5588.
4. Thorsteinsson T, Jóhannsson T, Stohl A, Kristiansen NI. High levels of particulate matter in Iceland due to direct ash emissions by the Eyjafjallajökull eruption and resuspension of deposited ash. *J Geophys Res*. 2012;117:B00C05. 9PP.
5. Gislason SR, Hassenkam T, Nedel S, Bovet N, Eiriksdottir ES, Alfredsson HA, et al. Characterization of Eyjafjallajökull volcanic ash particles and a protocol for rapid risk assessment. *P Natl Acad Sci USA*. 2011;108(18):7307-7312.
6. Carlsen H, Gíslason T, Benediktsdottir B, Kolbeinsson T, Hauksdottir A, Thorsteinsson T, et al. A survey of early health effects of the Eyjafjallajökull 2010 eruption in Iceland – a population-based study. *BMJ Open*. 2012; 2.
7. Small C, Naumann T. The global distribution of human population and recent volcanism. *Glob*

- 1  
2  
3  
4  
5  
6  
7  
8  
9  
10  
11  
12  
13  
14  
15  
16  
17  
18  
19  
20  
21  
22  
23  
24  
25  
26  
27  
28  
29  
30  
31  
32  
33  
34  
35  
36  
37  
38  
39  
40  
41  
42  
43  
44  
45  
46  
47  
48  
49  
50  
51  
52  
53  
54  
55  
56  
57  
58  
59  
60
- Environ Chang - Part B: Environmental Hazards*. 2003;3(3-4):93-109.
8. Horwell C, Baxter P. The respiratory health hazards of volcanic ash: a review for volcanic risk mitigation. *B Volcanol*. 2006;69(1):1-24.
9. Hansell AL, Horwell CJ, Oppenheimer C. The health hazards of volcanoes and geothermal areas. *Occup Environ Med*. 2006; 63(2):149-156.
10. Longo BM, Rossignol A, Green JB. Cardiorespiratory health effects associated with sulphurous volcanic air pollution. *Public Health*. 2008;122(8):809-820.
11. Durand M, Wilson JG. Spatial analysis of respiratory disease on an urbanized geothermal field. *Envir Res*. 2006;101(2):238-245.
12. Shore JH, Tatum EL, Vollmer WM. Evaluation of mental effects of disaster, Mount St. Helens eruption. *Am J Public Health*. 1986;76(Suppl):76-83.
13. Ohta Y, Araki K, Kawasaki N, Nakane Y, Honda S, Mine M. Psychological distress among evacuees of a volcanic eruption in Japan: A follow-up study. *Psychiatry Clin Neurosci*. 2003;57(1):105-111.
14. Thordarson T, Larsen G. Volcanism in Iceland in historical time: Volcano types, eruption styles and eruptive history. *J Geodyn*. 2007;43(1):118-152.
15. Larsen G, Höskuldsson Á. Ash layer from Eyjafjallajökull April 17 2010. Reykjavík, Iceland: Institute of Earth Sciences; 2010. [cited 2011 Nov 1]  
[http://jardvis.hi.is/Apps/WebObjects/HI.woa/swdocument/1015817/2010-04-17\\_GLARE+%C3%B6skulag\\_Eyjafj%C3%B6ll.pdf](http://jardvis.hi.is/Apps/WebObjects/HI.woa/swdocument/1015817/2010-04-17_GLARE+%C3%B6skulag_Eyjafj%C3%B6ll.pdf)
16. Statistics Iceland. *Hagstofa Íslands - Talnaefni » Mannfjöldi » PX*. [cited 2011 Sep 1]  
<http://hagstofa.is/Hagtolar/Mannfjoldi/Byggdakjarnar,-postnumer,-hverfi>

- 1  
2  
3  
4  
5  
6  
7  
8  
9  
10  
11  
12  
13  
14  
15  
16  
17  
18  
19  
20  
21  
22  
23  
24  
25  
26  
27  
28  
29  
30  
31  
32  
33  
34  
35  
36  
37  
38  
39  
40  
41  
42  
43  
44  
45  
46  
47  
48  
49  
50  
51  
52  
53  
54  
55  
56  
57  
58  
59  
60
17. Burney PG, Luczynska C, Chinn S, Jarvis D. The European Community Respiratory Health Survey. *Eur Respir J*. 1994;7(5):954-960.
18. Goldberg D, Williams P. *A User's Guide to the General Health Questionnaire*. Oxford: NFER-Nelson Publishing Company Ltd; 1988.
19. Goldberg DP, Gater R, Sartorius N, Ustun TB, Piccinelli M, Guree O, et al. The Validity of Two Versions of the GHQ in the WHO Study of Mental Illness in General Health Care. *Psychol Med*. 1997;27(01):191-197.
20. Schmitz C, et al. *LimeSurvey*. Germany: Carsten Schmitz; 2010.
21. IBM. *IBM SPSS statistics version 19*. New York: IBM; 2010.
22. Arnalds, Ó. Dust sources and deposition of aeolian materials in Iceland. *Iceland Agricultural Science*. 2010; 23:3-29.
23. Prospero, JH, Bullard, JE, Hodgkins, R. High-Latitude Dust Over the North Atlantic: Inputs from Icelandic Proglacial Dust Storms. *Science*. 2012;334:1078-1082.
24. Bernstein R, Baxter P, Falk H, Roy I, Foster L, Frost F. Immediate public health concerns and actions in volcanic eruptions: lessons from the Mount St. Helens eruptions, May 18-October 18, 1980. *Am J Public Health*. 1986;76(Suppl):25-38.
25. Thorsteinsson T, Gísladóttir G, Bullard J, McTainsh G. Dust storm contributions to airborne particulate matter in Reykjavík, Iceland. *Atmos Environ*. 2011;45:5924-5933
26. Buist AS, Bernstein RS, Johnson LR, Vollmer WM. Evaluation of physical health effects due to volcanic hazards: human studies. *Am J Public Health*. 1986;76(Suppl):66-75.
27. Daniels MJ, Dominici F, Samet JM, Zeger SL. Estimating Particulate Matter-Mortality Dose-Response Curves and Threshold Levels: An Analysis of Daily Time-Series for the 20 Largest

1 US Cities. *Am J Epidemiol.* 2000;152(5):397-406.

- 2  
3  
4  
5 28. Shimizu Y, Dobashi K, Hisada T, Ono A, Todokoro M, Iijima H, et al. Acute impact of  
6 volcanic ash on asthma symptoms and treatment. *Int J Immunopathol Pharmacol.*  
7  
8 2007;20(2)(Suppl):9-14.  
9  
10  
11  
12 29. Wehner AP, Dagle GE, Clark ML, Buschbom RL. Lung changes in rats following inhalation  
13 exposure to volcanic ash for two years. *Envir Res.* 1986;40(2):499-517.  
14  
15  
16  
17  
18  
19  
20  
21  
22  
23  
24  
25  
26  
27  
28  
29  
30  
31  
32  
33  
34  
35  
36  
37  
38  
39  
40  
41  
42  
43  
44  
45  
46  
47  
48  
49  
50  
51  
52  
53  
54  
55  
56  
57  
58  
59  
60

1  
2  
3  
4  
5  
6  
7  
8  
9  
10  
11  
12  
13  
14  
15  
16  
17  
18  
19  
20  
21  
22  
23  
24  
25  
26  
27  
28  
29  
30  
31  
32  
33  
34  
35  
36  
37  
38  
39  
40  
41  
42  
43  
44  
45  
46  
47  
48  
49  
50  
51  
52  
53  
54  
55  
56  
57  
58  
59  
60

For peer review only

**Table 1 Participation and demographic characteristics of the exposed (South Iceland) and non-exposed (North Iceland) populations.**

|                                                                     | <b>Exposed</b>         | <b>Non-exposed</b>   |                       |
|---------------------------------------------------------------------|------------------------|----------------------|-----------------------|
|                                                                     | <b>% (n/N)</b>         | <b>% (n/N)</b>       | <b><i>p-value</i></b> |
| <b>Target population (identified in total population registers)</b> | <b>1811</b>            | <b>751</b>           |                       |
| Could not be found or reached                                       | 10.8% (196/1811)       | 7.2% (54/751)        | 0.01                  |
| <b>Study population</b>                                             | <b>1615</b>            | <b>697</b>           |                       |
| Refused to participate                                              | 17.8% (286/1615)       | 14.6% (102/697)      | 0.07                  |
| <b>Originally agreed to participate</b>                             | <b>1329</b>            | <b>595</b>           |                       |
| Explained non-participation *                                       | 7.0% (93/1329)         | 6.1% (36/595)        | 0.44                  |
| Un-explained non-participation **                                   | 6.6% (88/1329)         | 8.2% (49/595)        | 0.20                  |
| <b>Response rate (participants/study population)</b>                | <b>71% (1148/1615)</b> | <b>73% (510/697)</b> | 0.31                  |
| <b>Demographic characteristics</b>                                  |                        |                      |                       |
| Male                                                                | 49.0% (562)            | 51.4% (262)          | 0.36                  |
| Female                                                              | 51.0 (586)             | 48.6% (248)          | 0.36                  |
| <b>Age categories</b>                                               |                        |                      |                       |
| 18-23                                                               | 11.1% (128/1148)       | 8.2% (42/510)        | 0.07                  |
| 24-30                                                               | 8.6% (99/1148)         | 9.0% 46/510)         | 0.79                  |

|    |                                      |                  |                 |      |
|----|--------------------------------------|------------------|-----------------|------|
| 1  |                                      |                  |                 |      |
| 2  | 31-40                                | 15.2% (175/1148) | 14.3% (73/510)  | 0.55 |
| 3  |                                      |                  |                 |      |
| 4  | 41-50                                | 20.3% (233/1148) | 21.4% (109/510) | 0.62 |
| 5  |                                      |                  |                 |      |
| 6  |                                      |                  |                 |      |
| 7  | 51-60                                | 19.3% (222/1148) | 22.2% (113/510) | 0.19 |
| 8  |                                      |                  |                 |      |
| 9  |                                      |                  |                 |      |
| 10 | 61-70                                | 15.9% (183/1148) | 16.5% (84/510)  | 0.79 |
| 11 |                                      |                  |                 |      |
| 12 | 71- 80                               | 9.4% (108/1148)  | 8.4% (43/510)   | 0.52 |
| 13 |                                      |                  |                 |      |
| 14 |                                      |                  |                 |      |
| 15 | <b>Education</b>                     |                  |                 |      |
| 16 |                                      |                  |                 |      |
| 17 |                                      |                  |                 |      |
| 18 | No formal education                  | 5.4% (61/1134)   | 4.8% (24/501)   | 0.62 |
| 19 |                                      |                  |                 |      |
| 20 | Primary education                    | 35.9% (407/1134) | 30.9% (155/501) | 0.05 |
| 21 |                                      |                  |                 |      |
| 22 | Secondary education                  | 33.4% (379/1134) | 37.7% (189/501) | 0.09 |
| 23 |                                      |                  |                 |      |
| 24 |                                      |                  |                 |      |
| 25 | Professional or university education | 20.6% (234/1134) | 23.8% (119/501) | 0.16 |
| 26 |                                      |                  |                 |      |
| 27 |                                      |                  |                 |      |
| 28 | Other education*                     | 4.7% (53/1134)   | 2.8% (14/501)   | 0.08 |
| 29 |                                      |                  |                 |      |
| 30 |                                      |                  |                 |      |
| 31 | <b>Marital status</b>                |                  |                 |      |
| 32 |                                      |                  |                 |      |
| 33 |                                      |                  |                 |      |
| 34 | Married or cohabitating              | 72.4% (831/1148) | 76.6% (391/510) | 0.07 |
| 35 |                                      |                  |                 |      |
| 36 | Single or divorced                   | 18.3% (210/1148) | 15.5% (79/510)  | 0.17 |
| 37 |                                      |                  |                 |      |
| 38 |                                      |                  |                 |      |
| 39 | Relationship – no cohabitation       | 6.8% (78/1148)   | 4.7% (24/510)   | 0.10 |
| 40 |                                      |                  |                 |      |
| 41 |                                      |                  |                 |      |
| 42 | Widow or widower                     | 2.5% (29/1148)   | 3.1% (16/510)   | 0.48 |
| 43 |                                      |                  |                 |      |
| 44 |                                      |                  |                 |      |
| 45 |                                      |                  |                 |      |
| 46 |                                      |                  |                 |      |
| 47 |                                      |                  |                 |      |
| 48 |                                      |                  |                 |      |
| 49 |                                      |                  |                 |      |
| 50 |                                      |                  |                 |      |
| 51 |                                      |                  |                 |      |
| 52 |                                      |                  |                 |      |
| 53 |                                      |                  |                 |      |
| 54 |                                      |                  |                 |      |
| 55 |                                      |                  |                 |      |
| 56 |                                      |                  |                 |      |
| 57 |                                      |                  |                 |      |
| 58 |                                      |                  |                 |      |
| 59 |                                      |                  |                 |      |
| 60 |                                      |                  |                 |      |

**Table 1 Participation and demographic characteristics of the exposed (South Iceland) and non-exposed (North Iceland) populations (continued)**

|                                    |                  |                 |      |
|------------------------------------|------------------|-----------------|------|
| <b>Household size</b>              |                  |                 |      |
| 1 adult                            | 13.8% (151/1096) | 15.4% (76/494)  | 0.40 |
| 2 adults                           | 51.4% (563/1096) | 56.1% (277/494) | 0.40 |
| 3 adults                           | 21.3% (233/1096) | 18.0% (89/494)  | 0.14 |
| ≥4 adults                          | 13.6% (149/1096) | 10.5 (52/494)   | 0.09 |
| <b>Occupational status</b>         |                  |                 |      |
| Full time job                      | 60.4% (683/1130) | 61.0% (310/507) | 0.79 |
| Part time job                      | 9.1% (103/1130)  | 11.6% (59/507)  | 0.11 |
| Unemployed                         | 3.5% (40/1130)   | 1.2% (6/507)    | 0.01 |
| Student                            | 6.9% (78/1130)   | 5.7% (28/507)   | 0.29 |
| Homemaker or<br>maternity leave    | 9.4% (99/1130)   | 7.8% (40/507)   | 0.56 |
| Retired                            | 6.1% (69/1130)   | 6.3% (32/507)   | 0.87 |
| On disability or sick<br>leave     | 5.1% (58/1130)   | 6.3% (32/507)   | 0.33 |
| <b>Financial situation</b>         |                  |                 |      |
| Very good                          | 4.6% (52/1136)   | 4.3% (22/510)   | 0.81 |
| Good                               | 23.9% (271/1136) | 26.3% (134/510) | 0.92 |
| Acceptable (“making<br>ends meet”) | 55.6% (632/1136) | 56.1% (286/510) | 0.87 |



|    |                     |                  |                |      |  |
|----|---------------------|------------------|----------------|------|--|
| 1  | Bad                 | 13.5% (153/1136) | 12.0% (61/510) | 0.40 |  |
| 2  |                     |                  |                |      |  |
| 3  |                     |                  |                |      |  |
| 4  | Very bad “(indebted | 2.5% (28/1136)   | 1.4% (7/510)   | 0.16 |  |
| 5  | or bankruptcy”)     |                  |                |      |  |
| 6  |                     |                  |                |      |  |
| 7  |                     |                  |                |      |  |
| 8  |                     |                  |                |      |  |
| 9  |                     |                  |                |      |  |
| 10 |                     |                  |                |      |  |
| 11 |                     |                  |                |      |  |
| 12 |                     |                  |                |      |  |
| 13 |                     |                  |                |      |  |
| 14 |                     |                  |                |      |  |
| 15 |                     |                  |                |      |  |
| 16 |                     |                  |                |      |  |
| 17 |                     |                  |                |      |  |
| 18 |                     |                  |                |      |  |
| 19 |                     |                  |                |      |  |
| 20 |                     |                  |                |      |  |
| 21 |                     |                  |                |      |  |
| 22 |                     |                  |                |      |  |
| 23 |                     |                  |                |      |  |
| 24 |                     |                  |                |      |  |
| 25 |                     |                  |                |      |  |
| 26 |                     |                  |                |      |  |
| 27 |                     |                  |                |      |  |
| 28 |                     |                  |                |      |  |
| 29 |                     |                  |                |      |  |
| 30 |                     |                  |                |      |  |
| 31 |                     |                  |                |      |  |
| 32 |                     |                  |                |      |  |
| 33 |                     |                  |                |      |  |
| 34 |                     |                  |                |      |  |
| 35 |                     |                  |                |      |  |
| 36 |                     |                  |                |      |  |
| 37 |                     |                  |                |      |  |
| 38 |                     |                  |                |      |  |
| 39 |                     |                  |                |      |  |
| 40 |                     |                  |                |      |  |
| 41 |                     |                  |                |      |  |
| 42 |                     |                  |                |      |  |
| 43 |                     |                  |                |      |  |
| 44 |                     |                  |                |      |  |
| 45 |                     |                  |                |      |  |
| 46 |                     |                  |                |      |  |
| 47 |                     |                  |                |      |  |
| 48 |                     |                  |                |      |  |
| 49 |                     |                  |                |      |  |
| 50 |                     |                  |                |      |  |
| 51 |                     |                  |                |      |  |
| 52 |                     |                  |                |      |  |
| 53 |                     |                  |                |      |  |
| 54 |                     |                  |                |      |  |
| 55 |                     |                  |                |      |  |
| 56 |                     |                  |                |      |  |
| 57 |                     |                  |                |      |  |
| 58 |                     |                  |                |      |  |
| 59 |                     |                  |                |      |  |
| 60 |                     |                  |                |      |  |

\* Dropped out because of the nature of the questions, because they did not think the study applied to them, or because of illness or old age.

\*\* Did not reply, could not be reached for reminders, did not respond to reminders or returned empty questionnaires.

\*\*\* The exposed area was divided into three areas by levels of exposure with regard to magnitude of ash fall, see Supplement A. The p-value is based on comparison between the non-exposed and the sum of the exposed area.

1  
2  
3  
4  
5  
6  
7  
8  
9  
10  
11  
12  
13  
14  
15  
16  
17  
18  
19  
20  
21  
22  
23  
24  
25  
26  
27  
28  
29  
30  
31  
32  
33  
34  
35  
36  
37  
38  
39  
40  
41  
42  
43  
44  
45  
46  
47  
48  
49

For peer review only

Table 2 Risk of respiratory symptoms (ECHRS) in a population exposed to the Eyjafjallajökull volcanic eruption compared to a non-exposed population

|                                            | Non-exposed    | Exposed          | OR            |          |
|--------------------------------------------|----------------|------------------|---------------|----------|
|                                            | % (n/N)        | % (n/N)          | (95%CI)*      | <i>p</i> |
| Wheezing (last 12 months)                  | 10.2% (51/498) | 15.9% (177/1110) | 1.8 (1.3-2.5) | 0.001    |
| If yes, breathlessness at the same time    | 56.3% (27/48)  | 57.0% (94/165)   | 1.2 (0.6-2.4) | 0.56     |
| If yes, do you wheeze without a cold       | 66.0% (31/47)  | 70.7% (118/167)  | 1.2 (0.6-2.5) | 0.59     |
| Nocturnal chest tightness (last 12 months) | 6.6 (33/500)   | 12.1% (135/1115) | 2.0 (1.3-3.0) | 0.003    |
| Breathlessness at rest                     | 5.4% (27/500)  | 7.7% (85/1103)   | 1.4 (0.9-2.3) | 0.13     |
| Coughing without a cold                    | 15.9% (80/502) | 28.2% (314/1114) | 2.2 (1.6-2.9) | <0.001   |
| Nocturnal cough (last 12 months)           | 18.8% (95/504) | 23.2% (258/1110) | 1.3 (1.0-1.7) | 0.06     |
| Morning winter cough                       | 11.6% (60/504) | 12.0% (133/1111) | 1.0 (0.7-1.4) | 0.99     |
| Nocturnal or daytime winter cough          | 9.2% (46/498)  | 11.0% (121/1105) | 1.3 (0.9-1.8) | 0.23     |
| If yes, is it chronic**                    | 75.0% (30/40)  | 67.2% (78/116)   | 0.5 (0.2-1.4) | 0.19     |
| Morning winter phlegm                      | 10.2% (51/500) | 14.4% (159/1104) | 1.5 (1.1-2.1) | 0.02     |
| Nocturnal or daytime winter phlegm         | 5.8% (29/497)  | 8.1% (89/1097)   | 1.5 (1.0-2.4) | 0.08     |

1  
2  
3  
4  
5  
6  
7  
8  
9  
10  
11  
12  
13  
14  
15  
16  
17  
18  
19  
20  
21  
22  
23  
24  
25  
26  
27  
28  
29  
30  
31  
32  
33  
34  
35  
36  
37  
38  
39  
40  
41  
42  
43  
44  
45  
46  
47  
48  
49

|                                                 |                 |                  |                |       |
|-------------------------------------------------|-----------------|------------------|----------------|-------|
| If yes, is it chronic**                         | 96.4% (27/28)   | 86.9% (73/84)    | 0.3 (0.0-2.4)  | 0.25  |
| Dyspnea                                         | 7.8% (39/498)   | 11.8% (131/1106) | 1.6 (1.1-2.3)  | 0.02  |
| Nasal allergy and hay fever                     | 19.1% (96/502)  | 19.1% (213/1116) | 1.1 (0.8-1.4)  | 0.73  |
| Allergic rhinitis                               | 23.0% (115/501) | 29.5% (327/1109) | 1.4 (1.1-1.8)  | 0.007 |
| <b>Physician diagnosed conditions***</b>        |                 |                  |                |       |
| Asthma                                          | 14.3% (71/498)  | 11.9% (132/1111) | 0.8 (0.6-1.1)  | 0.17  |
| MD confirmed asthma diagnosis                   | 85.5% (59/69)   | 95.9% (117/122)  | 3.9 (1.2-12.5) | 0.03  |
| Heart disease                                   | 6.2% (31/503)   | 8.0% (89/1115)   | 1.4 (0.9-2.2)  | 0.15  |
| Chronic bronchitis                              | 4.2% (21/503)   | 7.0% (78/1107)   | 1.9 (1.1-3.1)  | 0.02  |
| Emphysema                                       | 2.0% (10/502)   | 1.9% (21/1109)   | 1.0 (0.5-2.3)  | 0.96  |
| Chronic obstructive pulmonary disease<br>(COPD) | 0.8% (4/500)    | 1.3% (14/1105)   | 1.7 (0.5-5.2)  | 0.36  |

\* Odds ratios from multivariate logistic regression adjusted for age category, sex, education, and smoking status.

\*\* Chronic: more than 3 months per year

\*\*\* Answering “Yes” to ”Has a physician ever told that you had (the disease)?“

Table 3 Risk of recent symptoms (physical and psychological), reported diseases and drug use of the exposed and un-exposed region

|                                   | Non-exposed % (n/N) | Exposed % (n/N)  | OR (95% CI)*  | <i>p</i> |
|-----------------------------------|---------------------|------------------|---------------|----------|
| <b>Respiratory symptoms**</b>     |                     |                  |               |          |
| Shortness of breath               | 3.5% (17/488)       | 6.7% (72/1074)   | 2.1 (1.2-3.6) | 0.011    |
| Feeling of tightness in chest     | 1.8% (9/491)        | 3.6% (38 /1070)  | 2.5 (1.1-5.8) | 0.03     |
| <b>Cough and phlegm**</b>         |                     |                  |               |          |
| Cough                             | 6.4% (31/488)       | 15.3% (166/1085) | 2.6 (1.7-3.9) | <0.001   |
| Phlegm                            | 5.5% (27 /488)      | 11.3% (122/1079) | 2.1 (1.3-3.2) | <0.001   |
| <b>Irritation symptoms**</b>      |                     |                  |               |          |
| Dry throat                        | 3.4% (17/494)       | 10.1% (110/1089) | 3.1 (1.8-5.3) | <0.001   |
| Eye irritation and itch           | 8.6% (42/487)       | 20.6% (224/1085) | 2.9 (2.0-4.1) | <0.001   |
| Skin rash/eczema                  | 5.1% (25/487)       | 6.2% (67/1075)   | 1.2 (0.8-1.9) | 0.39     |
| <b>Musculoskeletal symptoms**</b> |                     |                  |               |          |
| Back pain                         | 23% (116/494)       | 18.2% (196/1075) | 0.7 (0.5-0.9) | 0.012    |
| Myalgia                           | 24.2% (120/496)     | 20.1% (216/1073) | 0.7 (0.6-1.0) | 0.024    |
| <b>Sleep** and mental health</b>  |                     |                  |               |          |

1  
2  
3  
4  
5  
6  
7  
8  
9  
10  
11  
12  
13  
14  
15  
16  
17  
18  
19  
20  
21  
22  
23  
24  
25  
26  
27  
28  
29  
30  
31  
32  
33  
34  
35  
36  
37  
38  
39  
40  
41  
42  
43  
44  
45  
46  
47  
48  
49

|                                                                                                                                                                             |                 |                  |               |      |
|-----------------------------------------------------------------------------------------------------------------------------------------------------------------------------|-----------------|------------------|---------------|------|
| Insomnia                                                                                                                                                                    | 16.9% (84/497)  | 13.7% (148/1078) | 0.8 (0.6-1.0) | 0.08 |
| Psychological morbidity***                                                                                                                                                  | 19.0% (95/500)  | 24.6% (278/1129) | 1.3 (1.0-1.7) | 0.05 |
| <b>Regular drugs use (at least once per week)</b>                                                                                                                           |                 |                  |               |      |
| Asthma medication                                                                                                                                                           | 4.7% (24/510)   | 3.4% (39/1147)   | 0.7 (0.4-1.1) | 0.12 |
| Analgesics                                                                                                                                                                  | 11.4 % (58/510) | 8.7% (100/1147)  | 0.7 (0.5-1.0) | 0.04 |
| Any drug for depression, anxiety, sleeping and other mental symptoms                                                                                                        | 14.9% (76/510)  | 12.5% (144/1148) | 0.8 (0.6-1.1) | 0.12 |
| Blood pressure-lowering medication                                                                                                                                          | 19.6% (100/510) | 22.6 (259/1148)  | 1.3 (1.0-1.7) | 0.10 |
| * Odds ratios and 95% Confidence interval (CI) from multivariate logistic regression adjusted for age category, gender, education and smoking status.                       |                 |                  |               |      |
| **Answers “Yes, to a moderate extent” or “Yes, to much extent” to the question “Have any of the following symptoms disturbed your daily activities during the last month?”. |                 |                  |               |      |
| *** Psychological morbidity was derived from GHQ-12 referring to “the previous weeks”, using a binary cut-off score of >2.                                                  |                 |                  |               |      |

1  
2  
3  
4 Table 4 Risk of respiratory symptoms (ECHRS) in a population exposed to Eyjafjallajökull volcanic eruption by exposure level at the residence.  
5  
6  
7  
8  
9  
10  
11  
12  
13  
14  
15  
16  
17  
18  
19  
20  
21  
22  
23  
24  
25  
26  
27  
28  
29  
30  
31  
32  
33  
34  
35  
36  
37  
38  
39  
40  
41  
42  
43  
44  
45  
46  
47  
48  
49

For peer review only

|                                           | Low exposure* |                | Medium exposure* |                 | High exposure* |                 |
|-------------------------------------------|---------------|----------------|------------------|-----------------|----------------|-----------------|
|                                           | OR            | % (n/N)        | OR (95%CI)**     | % (n/N)         | OR (95%CI)**   | % (n/N)         |
| Wheezing (last 12 months                  | 1 (ref)       | 14.3% (21/147) | 1.1 (0.6-1.8)    | 14.6% (91/623)  | 1.4 (0.8-2.3)  | 19.1% (65/340)  |
| If yes, breathlessness at the same        | 1 (ref)       | 47.6% (10/21)  | 1.2 (0.4-3.2)    | 54.5% (48/88)   | 1.8 (0.6-5.4)  | 64.3% (36/56)   |
| time                                      |               |                |                  |                 |                |                 |
| If yes, do you wheeze without             | 1 (ref)       | 71.4% (15/21)  | 0.8 (0.2- 2.5)   | 67.4% (5/607)   | 1.1 (0.3-3.9)  | 75.4% (64/335)  |
| having a cold                             |               |                |                  |                 |                |                 |
| Nocturnal chest tightness (last 12 mo)    | 1 (ref)       | 6.0% (9/149)   | 2.1 (1.0-4.2)    | 11.4% (71/624)  | 3.1 (1.5-6.6)  | 16.1% (55/342)  |
| Breathlessness at rest                    | 1 (ref)       | 2.7% (4/146)   | 3.3 (1.2-9.3)    | 8.2% (51/619)   | 3.3 (1.1-9.7)  | 8.9% (30/338)   |
| Coughing without having                   | 1 (ref)       | 19.5% (29/149) | 2.0 (1.3-3.1)    | 31.1% (194/623) | 1.6 (1.0-2.6)  | 26.6% (91/342)  |
| Nocturnal cough (last 12 months           | 1 (ref)       | 13.6% (20/147) | 2.1 (1.3-3.5)    | 25.0% (155/619) | 2.0 (1.2-3.2)  | 24.1% (83/344)  |
| Cough in the morning in winter            | 1 (ref)       | 6.7 % (10/149) | 2.2 (1.1-4.3)    | 13.7% (85/620)  | 1.6 (0.8-3.3)  | 11.1% (38/342)  |
| Cough during the day or night in          | 1 (ref)       | 7.5% (11/147)  | 1.7 (0.9-3.4)    | 12.1% (75/619)  | 1.3 (0.6-2.7)  | 10.2% (35/342)  |
| winter                                    |               |                |                  |                 |                |                 |
| If yes, it is chronic***                  | 1 (ref)       | 70.0% (7/10)   | 0.6 (0.1-3.6)    | 63.9% (46/72)   | 1.1 (0.2-6.9)  | 70.6% (24/34)   |
| Morning winter phlegm                     | 1 (ref)       | 8.3% (12/145)  | 1.7 (0.9-3.2))   | 13.7% (85/620)  | 2.3 (1.2-4.4)  | 18.3% (62/339)  |
| Nocturnal or daytime winter phlegm        | 1 (ref)       | 4.9% (7/144)   | 1.5 (0.6-3.3)    | 6.9% (42/613)   | 2.4 (1.0-5.5)  | 11.8% (40/340)  |
| If yes, is it chronic***                  | 1 (ref)       | 85.7% (6/7)    | 0.7 (0.0-20.8)   | 92.5 (37/40)    | 0.5 (0.2-15.7) | 81.1 (30/37)    |
| Dyspnea                                   | 1 (ref)       | 6.7% (10/144)  | 1.9 (1.0-3.7)    | 6.9% (42/613)   | 2.4 (1.2-4.9)  | 11.8% (40/340)  |
| Nasal allergy and hay fever               | 1 (ref)       | 17.2% (25/145) | 1.2 (0.7-1.9)    | 19.4% (122/628) | 1.1 (0.7-1.9)  | 19.2% (66/345)  |
| Allergic rhinitis                         | 1 (ref)       | 22.8% (33/145) | 1.5 (0.9-2.2)    | 29.5% (184/624) | 1.7 (1.1-2.7)  | 32.4% (110/340) |
| <b>Physician diagnosed conditions****</b> |               |                |                  |                 |                |                 |
| Asthma                                    | 1 (ref)       | 17.2% (25/145) | 0.6 (0.4-0.1)    | 10.5% (65/622)  | 0.7 (0.4-1.2)  | 12.3% (42/342)  |
| MD confirmed asthma diagnosis             | 1 (ref)       | 95.5% (21/22)  | 0.3 (0.0-3.2)    | 93.7% (59/63)   | Na*****        | 100% (37/37)    |
| Heart disease                             | 1 (ref)       | 10.1% (15/149) | 0.8 (0.4-1.4)    | 7.2% (45/628)   | 0.8 (0.4-1.7)  | 8.6% (29/338)   |
| Chronic bronchitis                        | 1 (ref)       | 6.1% (9/147)   | 1.3 (0.6-2.7)    | 6.8% (42/620)   | 1.3 (0.6-3.0)  | 7.9% (27/340)   |
| Emphysema                                 | 1 (ref)       | 1.4% (2/146)   | 1.6 (0.3-7.5)    | 1.8% (11/623)   | 1.4 (0.3-7.1)  | 2.4% (8/340)    |



---

|                                              |         |              |                |              |                |              |
|----------------------------------------------|---------|--------------|----------------|--------------|----------------|--------------|
| Chronic obstructive pulmonary disease (COPD) | 1 (ref) | 0.7% (1/146) | 2.5 (0.3-20.2) | 1.5% (9/619) | 1.7 (0.2-14.2) | 1.2% (4/340) |
|----------------------------------------------|---------|--------------|----------------|--------------|----------------|--------------|

---

\* Regions are seen in figure 1.

\*\* Odds ratios from multivariate logistic regression adjusted for age category, gender, education, and smoking status.

\*\*\* Chronic: more than 3 months per year

\*\*\*\* Answering “Yes” to “Has a physician ever told that you had (the disease)?“

\*\*\*\*\* Cannot divide with 0.

er review only

Table 5 Risk of recent symptoms (physical and psychological), reported diseases and drug use within regions of the exposed area

|                                    | Low exposure* |                | Medium exposure* |                 | High exposure*  |                |
|------------------------------------|---------------|----------------|------------------|-----------------|-----------------|----------------|
|                                    | OR (95%CI)**  | %              | OR (95%CI)**     | %               | OR (95%CI)**    | %              |
| <b>Respiratory symptoms***</b>     |               |                |                  |                 |                 |                |
| Shortness of breath                | 1 (ref)       | 2.8% (4/144)   | 2.9 (1.0 - 8.5)  | 6.8% (41/600)   | 3.3 (1.1 - 9.9) | 8.2% (27/330)  |
| Feeling of tightness in chest      | 1 (ref)       | 1.4% (2/145)   | 3.4 (0.8 - 15.1) | 3.9% (23/597)   | 3.1 (0.7-14.5)  | 4.0% (13/328)  |
| <b>Cough and phlegm***</b>         |               |                |                  |                 |                 |                |
| Cough                              | 1 (ref)       | 4.9% (7/143)   | 3.6 (1.6- 8.1)   | 15.7% (95/607)  | 4.5 (2.0- 10.2) | 19.1% (64/335) |
| Phlegm                             | 1 (ref)       | 2.8% (4/142)   | 4.2 (1.5-11.8)   | 10.8% (65/603)  | 6.0 (2.1-17.1)  | 15.9% (53/334) |
| <b>Irritation symptoms***</b>      |               |                |                  |                 |                 |                |
| Dry throat                         | 1 (ref)       | 2.1% (3/145)   | 6.7 (2.0-21.6)   | 11.2% (68/608)  | 6.7 (2.0-22.2)  | 11.6% (39/336) |
| Eye irritation and itch            | 1 (ref)       | 8.3% (12/144)  | 3.4 (1.8-6.5)    | 21.5% (130/606) | 3.6 (1.9-7.0)   | 24.5% (82/335) |
| Skin rash or eczema                | 1 (ref)       | 2.1% (3/146)   | 3.0 (0.9-10.1)   | 6.0% (36/600)   | 4.3 (1.3-14.3)  | 8.5% (28/329)  |
| <b>Musculoskeletal symptoms***</b> |               |                |                  |                 |                 |                |
| Back pain                          | 1 (ref)       | 15.4% (22/143) | 1.3 (0.8-2.1)    | 18.0% (108/599) | 1.2 (0.7-2.1)   | 19.8% (66/333) |
| Myalgia                            | 1 (ref)       | 16.6% (24/145) | 1.3 (0.8-2.1)    | 20.0% (120/600) | 1.3 (0.8-2.3)   | 22.0% (72/328) |
| <b>Sleep and mental health</b>     |               |                |                  |                 |                 |                |

|                                                                      |         |                |               |                 |               |                |
|----------------------------------------------------------------------|---------|----------------|---------------|-----------------|---------------|----------------|
| Insomnia***                                                          | 1 (ref) | 6.3% (9/143)   | 2.4 (1.2-5.0) | 13.8% (83/601)  | 2.8 (1.3-5.9) | 16.8 (56/334)  |
| Psychological morbidity*****                                         | 1 (ref) | 20.0% (30/150) | 1.2 (0.8-1.9) | 24.8% (157/634) | 1.3 (0.8-2.1) | 26.4% (91/345) |
| <b>Regular drugs use (at least once per week)</b>                    |         |                |               |                 |               |                |
| Asthma medication                                                    | 1 (ref) | 3.9% (6/152)   | 0.7 (0.3-1.9) | 2.5% (16/644)   | 1.2 (0.4-3.2) | 4.8% (17/352)  |
| Analgesics                                                           | 1 (ref) | 7.2% (11/152)  | 1.5 (0.7-2.9) | 9.0% (58/644)   | 1.2 (0.6-2.6) | 8.8% (31/352)  |
| Any drug for depression, anxiety, sleeping and other mental symptoms | 1 (ref) | 5.3% (8/152)   | 3.6 (1.7-7.8) | 13.7% (88/644)  | 2.8 (1.3-6.3) | 13.6% (48/352) |
| Blood pressure-lowering medication                                   | 1 (ref) | 19.7% (30/152) | 1.7 (1.1-2.8) | 22.8% (147/644) | 1.4 (0.8-2.4) | 23.3% (82/352) |

\* Regions are seen in figure 1.

\*\* Odds ratios and 95% Confidence interval (CI) from multivariate logistic regression adjusted for age category, gender, education and smoking status.

\*\*\* Answering “Yes, to a moderate extent” or “Yes, to much extent” to the question “Have any of the following symptoms disturbed your daily activities during the last month?”.

\*\*\*\* Psychological morbidity was derived from GHQ-12 referring to “the previous weeks”, using a binary cut-off score of >2.

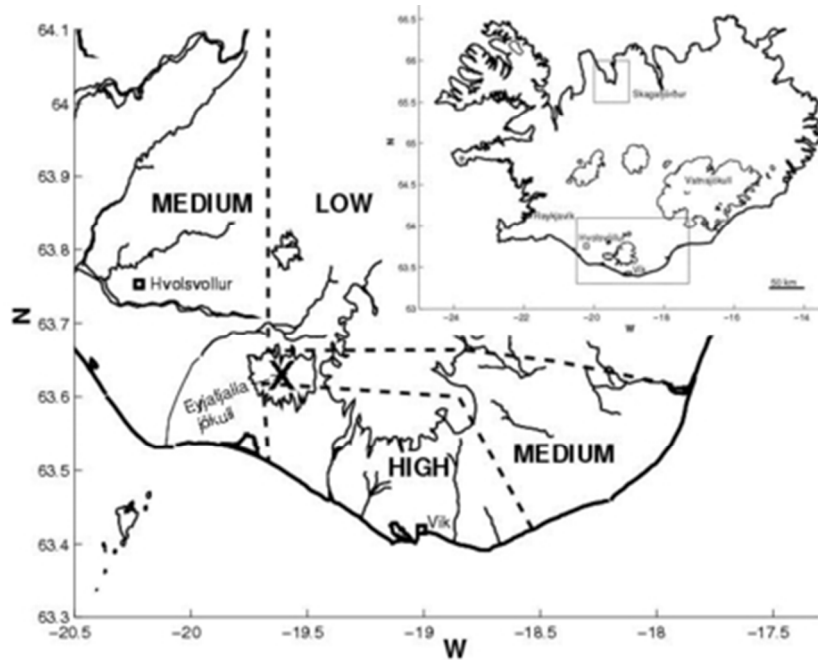

nserted map of Iceland shows the location of Skagafjörður (non-exposed, control area) in the north and of the exposed area in South Iceland. The larger map of the exposed area shows Eyjafjallajökull (marked with X) and the low, medium and high ash exposure areas.

17x13mm (600 x 600 DPI)

1  
2  
3  
4  
5  
6  
7  
8  
9  
10  
11  
12  
13  
14  
15  
16  
17  
18  
19  
20  
21  
22  
23  
24  
25  
26  
27  
28  
29  
30  
31  
32  
33  
34  
35  
36  
37  
38  
39  
40  
41  
42  
43  
44  
45  
46  
47  
48  
49  
50  
51  
52  
53  
54  
55  
56  
57  
58  
59  
60

## Venn-diagram

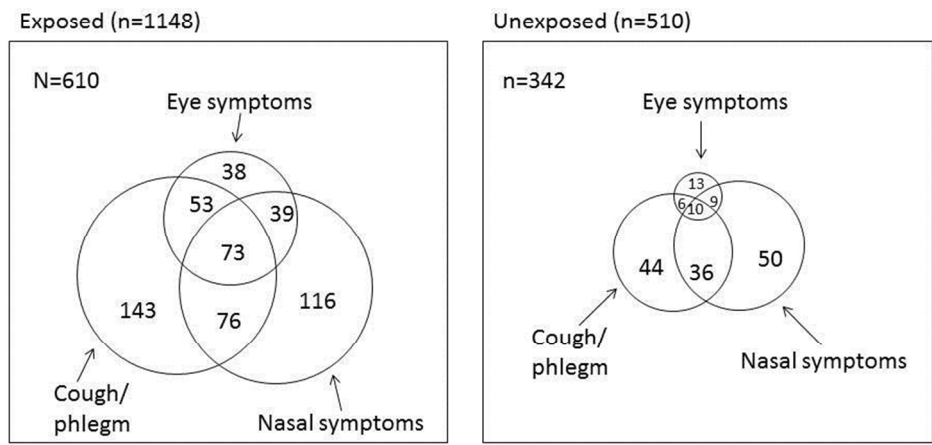

Venn diagram of exposed and non-exposed participants reporting one or more key symptom six to nine months after the Eyjafjallajökull eruption.  
254x190mm (96 x 96 DPI)

ew only

STROBE Statement—for Volcano-Health study....page numbers pertain to the submitted manuscript file.

|                           | Item No | Recommendation                                                                                                                                                                                                                                                                                                         |                                                                      |
|---------------------------|---------|------------------------------------------------------------------------------------------------------------------------------------------------------------------------------------------------------------------------------------------------------------------------------------------------------------------------|----------------------------------------------------------------------|
| <b>Title and abstract</b> | 1       | (a) Indicate the study's design with a commonly used term in the title or the abstract<br>(b) Provide in the abstract an informative and balanced summary of what was done and what was found                                                                                                                          | Page 1<br>Abstract page3                                             |
| <b>Introduction</b>       |         |                                                                                                                                                                                                                                                                                                                        |                                                                      |
| Background/rationale      | 2       | Explain the scientific background and rationale for the investigation being reported                                                                                                                                                                                                                                   | P 5                                                                  |
| Objectives                | 3       | State specific objectives, including any prespecified hypotheses                                                                                                                                                                                                                                                       | P 7                                                                  |
| <b>Methods</b>            |         |                                                                                                                                                                                                                                                                                                                        |                                                                      |
| Study design              | 4       | Present key elements of study design early in the paper                                                                                                                                                                                                                                                                | Page 6(intro)                                                        |
| Setting                   | 5       | Describe the setting, locations, and relevant dates, including periods of recruitment, exposure, follow-up, and data collection                                                                                                                                                                                        | Page 8, data collection                                              |
| Participants              | 6       | (a) Give the eligibility criteria, and the sources and methods of selection of participants. Describe methods of follow-up<br>(b) For matched studies, give matching criteria and number of exposed and unexposed                                                                                                      | Page 9, data collection.<br>Page 8, study population                 |
| Variables                 | 7       | Clearly define all outcomes, exposures, predictors, potential confounders, and effect modifiers. Give diagnostic criteria, if applicable                                                                                                                                                                               | Page 9, questionnaire, coding.                                       |
| Data sources/measurement  | 8*      | For each variable of interest, give sources of data and details of methods of assessment (measurement). Describe comparability of assessment methods if there is more than one group                                                                                                                                   | Page 9 (same)<br>Page 8 study population                             |
| Bias                      | 9       | Describe any efforts to address potential sources of bias                                                                                                                                                                                                                                                              | population P9                                                        |
| Study size                | 10      | Explain how the study size was arrived at                                                                                                                                                                                                                                                                              | datacollection/p10                                                   |
| Quantitative variables    | 11      | Explain how quantitative variables were handled in the analyses. If applicable, describe which groupings were chosen and why                                                                                                                                                                                           | results                                                              |
| Statistical methods       | 12      | (a) Describe all statistical methods, including those used to control for confounding<br>(b) Describe any methods used to examine subgroups and interactions<br>(c) Explain how missing data were addressed<br>(d) If applicable, explain how loss to follow-up was addressed<br>(e) Describe any sensitivity analyses | -<br>P10<br>statistical analysis<br>Page 10, Stat. analys.<br>-<br>- |
| <b>Results</b>            |         |                                                                                                                                                                                                                                                                                                                        |                                                                      |

|                                                                                                                                        |                          |     |                                                                                                                                                                                                                                                                                                                                                                                                                           |                                                  |
|----------------------------------------------------------------------------------------------------------------------------------------|--------------------------|-----|---------------------------------------------------------------------------------------------------------------------------------------------------------------------------------------------------------------------------------------------------------------------------------------------------------------------------------------------------------------------------------------------------------------------------|--------------------------------------------------|
| 1<br>2<br>3<br>4<br>5<br>6<br>7<br>8<br>9<br>10                                                                                        | Participants             | 13* | (a) Report numbers of individuals at each stage of study—eg numbers potentially eligible, examined for eligibility, confirmed eligible, included in the study, completing follow-up, and analysed<br><hr/> (b) Give reasons for non-participation at each stage<br><hr/> (c) Consider use of a flow diagram                                                                                                               | P1<br>Results/table 1<br><br>Table 1<br><br>-    |
| 11<br>12<br>13<br>14<br>15<br>16<br>17<br>18<br>19<br>20<br>21<br>22<br>23<br>24<br>25<br>26<br>27<br>28<br>29<br>30<br>31<br>32<br>33 | Descriptive data         | 14* | (a) Give characteristics of study participants (eg demographic, clinical, social) and information on exposures and potential confounders<br><hr/> (b) Indicate number of participants with missing data for each variable of interest<br><hr/> (c) Summarise follow-up time (eg, average and total amount)                                                                                                                | Table 1 and others<br><br>Ok<br><br>-            |
| 34<br>35<br>36<br>37                                                                                                                   | Outcome data             | 15* | Report numbers of outcome events or summary measures over time                                                                                                                                                                                                                                                                                                                                                            | Tables.                                          |
| 38<br>39<br>40<br>41<br>42<br>43<br>44<br>45<br>46<br>47<br>48<br>49<br>50<br>51<br>52<br>53                                           | Main results             | 16  | (a) Give unadjusted estimates and, if applicable, confounder-adjusted estimates and their precision (eg, 95% confidence interval). Make clear which confounders were adjusted for and why they were included<br><hr/> (b) Report category boundaries when continuous variables were categorized<br><hr/> (c) If relevant, consider translating estimates of relative risk into absolute risk for a meaningful time period | Tables.<br>P10<br>stat.methods<br><br>-<br><br>- |
| 54<br>55<br>56<br>57<br>58<br>59<br>60                                                                                                 | Other analyses           | 17  | Report other analyses done—eg analyses of subgroups and interactions, and sensitivity analyses                                                                                                                                                                                                                                                                                                                            | P 10 Stat methods/p 12                           |
|                                                                                                                                        | <b>Discussion</b>        |     |                                                                                                                                                                                                                                                                                                                                                                                                                           |                                                  |
|                                                                                                                                        | Key results              | 18  | Summarise key results with reference to study objectives                                                                                                                                                                                                                                                                                                                                                                  | P13                                              |
|                                                                                                                                        | Limitations              | 19  | Discuss limitations of the study, taking into account sources of potential bias or imprecision. Discuss both direction and magnitude of any potential bias                                                                                                                                                                                                                                                                | P13-14                                           |
|                                                                                                                                        | Interpretation           | 20  | Give a cautious overall interpretation of results considering objectives, limitations, multiplicity of analyses, results from similar studies, and other relevant evidence                                                                                                                                                                                                                                                | P14-15.                                          |
|                                                                                                                                        | Generalisability         | 21  | Discuss the generalisability (external validity) of the study results                                                                                                                                                                                                                                                                                                                                                     | P15                                              |
|                                                                                                                                        | <b>Other information</b> |     |                                                                                                                                                                                                                                                                                                                                                                                                                           |                                                  |
|                                                                                                                                        | Funding                  | 22  | Give the source of funding and the role of the funders for the present study and, if applicable, for the original study on which the present article is based                                                                                                                                                                                                                                                             | Page 2.<br><br>-                                 |

\*Give information separately for exposed and unexposed groups.

**Note:** An Explanation and Elaboration article discusses each checklist item and gives methodological background and published examples of transparent reporting. The STROBE checklist is best used in conjunction with this article (freely available on the Web sites of PLoS Medicine at <http://www.plosmedicine.org/>, Annals of Internal Medicine at <http://www.annals.org/>, and Epidemiology at <http://www.epidem.com/>). Information on the STROBE Initiative is available at <http://www.strobe-statement.org>.

For peer review only





## Health effects following the Eyjafjallajökull volcanic eruption – a population-based study

|                                 |                                                                                                                                                                                                                                                                                                                                                                                                                                                                                                                                                                                                                                                                                                                                                                                                                                                                                                                                                                                                                                                                                                                                                                                        |
|---------------------------------|----------------------------------------------------------------------------------------------------------------------------------------------------------------------------------------------------------------------------------------------------------------------------------------------------------------------------------------------------------------------------------------------------------------------------------------------------------------------------------------------------------------------------------------------------------------------------------------------------------------------------------------------------------------------------------------------------------------------------------------------------------------------------------------------------------------------------------------------------------------------------------------------------------------------------------------------------------------------------------------------------------------------------------------------------------------------------------------------------------------------------------------------------------------------------------------|
| Journal:                        | <i>BMJ Open</i>                                                                                                                                                                                                                                                                                                                                                                                                                                                                                                                                                                                                                                                                                                                                                                                                                                                                                                                                                                                                                                                                                                                                                                        |
| Manuscript ID:                  | bmjopen-2012-001851.R1                                                                                                                                                                                                                                                                                                                                                                                                                                                                                                                                                                                                                                                                                                                                                                                                                                                                                                                                                                                                                                                                                                                                                                 |
| Article Type:                   | Research                                                                                                                                                                                                                                                                                                                                                                                                                                                                                                                                                                                                                                                                                                                                                                                                                                                                                                                                                                                                                                                                                                                                                                               |
| Date Submitted by the Author:   | 21-Sep-2012                                                                                                                                                                                                                                                                                                                                                                                                                                                                                                                                                                                                                                                                                                                                                                                                                                                                                                                                                                                                                                                                                                                                                                            |
| Complete List of Authors:       | <p>Carlsen, Hanne Krage; University of Iceland, Centre of Public Health; Umeå University , Occupational and Environmental Health</p> <p>Hauksdóttir, Arna; University of Iceland, Centre of Public Health Sciences</p> <p>Valdimarsdttir, Unnur; University of Iceland, Centre of Public Health Sciences</p> <p>Gislason, Thorarinn; National University Hospital of Iceland, Department of Respiratory Medicine and Sleep; University of Iceland, Faculty of Medicine</p> <p>Einardsóttir, Gunnlaug; Environmental Agency of Iceland, Runólfsson, Halldór; MAST – Icelandic Food and Veterinary Authority, Briem, Haraldur; Directorate of Health, Centre for Health Security and Communicable Disease Control</p> <p>Finnbjörnsdóttir, Ragnhildur; University of Iceland, Centre of Public Health Sciences</p> <p>Guðmundsson, Sigurður; University of Iceland, School of Health Sciences</p> <p>Kolbeinsson, Thórir; The Health Care Institution of South Iceland, Thorsteinsson, Throstur; University of Iceland, Environment and Natural Resources &amp; Institute of Earth Sciences</p> <p>Pétursdóttir, Guðrún; University of Iceland, Institute for Sustainability Studies</p> |
| <b>Primary Subject Heading</b>: | Public health                                                                                                                                                                                                                                                                                                                                                                                                                                                                                                                                                                                                                                                                                                                                                                                                                                                                                                                                                                                                                                                                                                                                                                          |
| Secondary Subject Heading:      | Epidemiology, Occupational and environmental medicine                                                                                                                                                                                                                                                                                                                                                                                                                                                                                                                                                                                                                                                                                                                                                                                                                                                                                                                                                                                                                                                                                                                                  |
| Keywords:                       | EPIDEMIOLOGY, PUBLIC HEALTH, Epidemiology < THORACIC MEDICINE                                                                                                                                                                                                                                                                                                                                                                                                                                                                                                                                                                                                                                                                                                                                                                                                                                                                                                                                                                                                                                                                                                                          |
|                                 |                                                                                                                                                                                                                                                                                                                                                                                                                                                                                                                                                                                                                                                                                                                                                                                                                                                                                                                                                                                                                                                                                                                                                                                        |

SCHOLARONE™  
Manuscripts

# Health effects following the Eyjafjallajökull volcanic eruption– a population-based study

Hanne Krage Carlsen\*, Arna Hauksdóttir\*, Unnur Anna Valdimarsdóttir, Þórarinn Gíslason, Gunnlaug Einarsdóttir, Halldór Runólfsson, Haraldur Briem, Ragnhildur Finnbjörnsdóttir, Sigurður Guðmundsson, Þórir Björn Kolbeinsson, Þröstur Þorsteinsson and Guðrún **Pétursdóttir**

*\*Hanne Krage Carlsen and Arna Hauksdóttir share responsibility as first authors*

Centre of Public Health Sciences, University of Iceland, 101 Reykjavík, Iceland & Department of Occupational and Environmental Medicine, University of Umeå, Sweden, 901 87 Umeå, Sweden

**Hanne Krage Carlsen\*** PhD candidate Centre of Public Health Sciences, University of Iceland, 101 Reykjavík, Iceland **Arna Hauksdóttir \*** assistant professor Centre of Public Health Sciences, University of Iceland, 101 Reykjavík, Iceland **Unnur Anna Valdimarsdóttir** associate professor Faculty of Medicine, School of Health Sciences, University of Iceland, 102 Reykjavík, Iceland **Þórarinn (Thorarinn) Gíslason** professor, MD The Environment Agency of Iceland, 108 Reykjavík, Iceland **Gunnlaug Einarsdóttir** director MAST – Icelandic Food and Veterinary Authority, 800 Selfoss, Iceland **Halldór Runólfsson** Chief veterinarian The Directorate of Health, 101 Reykjavík, Iceland **Haraldur Briem** Chief Epidemiologist Centre of Public Health Sciences, University of Iceland, 101 Reykjavík, Iceland **Ragnhildur Finnbjörnsdóttir** PhD candidate School of Health Sciences, University of Iceland, Vatnsmyrarvegur 16, 102 Reykjavík, Iceland **Sigurður Guðmundsson** professor Dean The Health Care Institution of South Iceland, 800 Selfoss, Iceland **Þórir (Thorir) Björn Kolbeinsson** MD Head physician Environment and Natural Resources & Institute of Earth Sciences, University of Iceland, 101 Reykjavík, Iceland **Þröstur (Throstur) Þorsteinsson (Thorsteinsson)** associate professor Institute for Sustainability Studies, University of Iceland, 101 Reykjavík, Iceland **Guðrún Pétursdóttir** associate professor, Director

1  
2  
3  
4  
5  
6 Correspondence to:

7 G Pétursdóttir [guðrun@hi.is](mailto:guðrun@hi.is)

8 Institute for Sustainability Studies, University of Iceland,

9 Gimli v/Sæmundargötu,

10 101 Reykjavík, Iceland

11 Telephone number: +354 4724

12 Cell: +354 820 05 75

13 Fax: +354 552 13 31

14  
15  
16  
17  
18  
19  
20 *Statements*

21 “The Corresponding Author has the right to grant on behalf of all authors and does grant on behalf  
22 of all authors, a worldwide licence to the Publishers and its licensees in perpetuity, in all forms,  
23 formats and media (whether known now or created in the future), to i) publish, reproduce,  
24 distribute, display and store the Contribution, ii) translate the Contribution into other languages,  
25 create adaptations, reprints, include within collections and create summaries, extracts and/or,  
26 abstracts of the Contribution, iii) create any other derivative work(s) based on the Contribution, iv)  
27 to exploit all subsidiary rights in the Contribution, v) the inclusion of electronic links from the  
28 Contribution to third party material where-ever it may be located; and, vi) licence any third party to  
29 do any or all of the above.”

30  
31  
32  
33  
34  
35  
36  
37  
38 All the authors conceived and designed the study and had full access to the data. AH, UAV, ÞBK, and GP  
39 gathered the data and HKC, AH, UAV, and GP did the statistical analyses. ÞÞ provided estimates of ash  
40 fall density. HKC and AH drafted the article, which was critically revised by all the authors, who also  
41 approved the final report. GP (guarantor) supervised the study, had full access to all the data in the study  
42 and carries the final responsibility for deciding to submit it for publication, and takes responsibility for  
43 the integrity of the data and the accuracy of the data analysis.

44  
45  
46  
47  
48  
49  
50 The participants of this study gave informed consent before participating in the study. The consent  
51 includes future follow-up, by questionnaire or in registers.

52  
53 None of the authors have conflicts of interests or competing interests to declare.

54  
55 The study was approved by The Icelandic Data Protection Authority (nr. S4878/2010) and The  
56 Science Bioethics Committee (nr. VSNb2010080002/03.7).

57  
58 The study and article was funded through a grant from the Icelandic Government, the funding source had  
59  
60

1 no influence on the design, analysis or reporting of this study.

2 We do not wish to share the data used in this study.

3 We thank Hildur Friðriksdóttir, M.A. (University of Iceland) for administrative support.

4 Last but not least, we thank the participants for their cooperation.

### 5 **Data Sharing**

6 Professor Pétursdóttir holds all the data used in this study. The data set holds additional information  
7 about health of children and mental health, which the authors seek to publish later. The data is  
8 anonymised, but could hold identifiable details, thus we do not wish to share the data.

## Abstract

**Objectives** The study aimed to determine whether exposure to a volcanic eruption was associated with increased prevalence of physical and/or mental symptoms.

**Design** Cohort, with non-exposed control group.

**Setting** Natural disasters like volcanic eruptions constitute a major public health threat. The Icelandic volcano Eyjafjallajökull exposed residents in southern Iceland to continuous ash fall for more than 5 weeks in spring 2010. This study was conducted November 2010-March 2011, six to nine months after the Eyjafjallajökull eruption.

**Participants** Adult (18-80 years of age) eruption-exposed South Icelanders (n=1,148) and a control population of residents of Skagafjörður, North Iceland (n=510). The participation rate was 72%.

**Main Outcome Measures** Physical symptoms in the previous year (chronic), in the previous month (recent), General Health Questionnaire (GHQ-12) measured psychological morbidity.

**Results** The likelihood of having symptoms during the last month was higher in the exposed population, such as; tightness in the chest (odds ratio (OR) 2.5; 95% CI, 1.1-5.8), cough (OR, 2.6; 95% CI, 1.7-3.9), phlegm (OR, 2.1; 95% CI, 1.3-3.2), eye irritation (OR, 2.9; 95% CI, 2.0-4.1), and psychological morbidity symptoms (OR, 1.3; 95% CI, 1.0-1.7). Respiratory symptoms during the last 12 months were also more common in the exposed population; cough (OR, 2.2; 95% CI, 1.6-2.9), dyspnea (OR, 1.6; 95% CI, 1.1-2.3), although the prevalence of underlying asthma and heart disease was similar. Twice as many in the exposed population had two or more symptoms from nose, eyes, or upper-respiratory tract (24% vs. 13%,  $p < 0.001$ ); these individuals were also more likely to experience psychological morbidity (OR, 4.69; 95% CI, 3.39-6.50) compared to individuals with no symptoms. Most symptoms exhibited a dose-response pattern within the exposed population, corresponding to low, medium, and high exposure to the eruption.

**Conclusions** Six to nine months after the Eyjafjallajökull eruption, residents living in the exposed area, particularly those closest to the volcano, had markedly increased prevalence of various physical symptoms. A portion of the exposed population reported multiple symptoms and may be at

1 risk for long-term physical and psychological morbidity. Studies of long-term consequences are  
2  
3 therefore warranted.  
4  
5  
6  
7  
8

9  
10 **What this paper adds:**

11 What is already known:

12 Natural disasters like volcanic eruptions constitute a major public health threat. Exposure to  
13 volcanic ash may affect respiratory health.  
14  
15

16 What this paper adds:

17 A larger population-based cohort with a control group was assessed with questionnaires and  
18 increased rates of respiratory and mental health symptoms were found some six months after  
19 exposure to a volcanic eruption, indicating that health effects may be long-lasting.  
20  
21  
22  
23  
24  
25  
26  
27  
28  
29  
30  
31  
32  
33  
34  
35  
36  
37  
38  
39  
40  
41  
42  
43  
44  
45  
46  
47  
48  
49  
50  
51  
52  
53  
54  
55  
56  
57  
58  
59  
60

## Introduction

Throughout history, human societies have been exposed to natural disasters like volcanic eruptions and earthquakes. In 2010, 300 000 individuals were killed worldwide in natural disasters.<sup>1</sup> Accurate information on mortality and long-term health consequences of natural disasters is instrumental to strengthen risk management and decrease their negative health impact.<sup>2</sup>

The eruption of the Eyjafjallajökull volcano in Iceland, which lasted from April 14<sup>th</sup> to May 20<sup>th</sup> 2010, made headlines worldwide, not least because of extensive effects on international flight traffic. Direct ash fall from the eruption was estimated at around 250 million tons, the rural regions in Iceland south and south-east of the volcano were most severely affected.<sup>3,4</sup> Ash fall was continuous for about 6 weeks, and following the eruption the ash was frequently resuspended in the area.<sup>4,5</sup> The surface of the fresh ash particles contained reactive salts and as much as 20% of the particles (by mass) were less than 10 µm in aerodynamic diameter and could enter the lower respiratory tract.<sup>6</sup> A study of local residents (N=207) was conducted immediately after the eruption ended. Participants were examined by a physician and to ascertain respiratory health, standardized spirometry was performed before and after bronchodilator usage. Adult participants also answered questionnaires about mental and physical health. Ash exposure was associated with high prevalence of eye- and upper airway irritation (25% and 50% respectively), and exacerbation of pre-existing asthma but did not contribute to serious health problems or impair respiratory function compared to controls. 39% showed symptoms of psychological morbidity as measured by the General Health Questionnaire (GHQ).<sup>7</sup> Residents from the region east of Eyjafjallajökull have expressed a need for more detailed information concerning ash fall during the eruption as the health effects were not known.<sup>8</sup> Meanwhile, the impact on long-term health of the residents remains to be explored. Previous studies on volcanic ash exposure and health have shown increased respiratory morbidity and asthma attacks,<sup>9,10</sup> and increased hospital visits for respiratory illness in association with some eruptions<sup>11</sup> but not in others.<sup>12</sup> Also, increased irritation of the respiratory tract from short-term exposure to volcanic gases and ash.<sup>13</sup> Long-term exposure to sulphuric gases (often emitted in

1 volcanic eruptions) were found to be associated with increased prevalence of chronic bronchitis and  
2  
3 cardio-respiratory symptoms in some studies.<sup>14,15</sup> In addition to direct physical health hazards,  
4  
5 experiencing floods, lahars, as well as being exposed to prolonged ash suspension can be a threat to  
6  
7 mental health. Stress levels may increase dramatically and have been shown to contribute to  
8  
9 psychological morbidity such as post traumatic stress syndrome or depression.<sup>16,17</sup>  
10  
11 Health effects of long-term exposure to a volcanic eruption are important both from a scientific and  
12  
13 health care standpoint.<sup>18</sup> Iceland's population-based registries and strong infrastructure present an  
14  
15 important opportunity to study such health impacts, particularly in terms of long-term follow-up.  
16  
17 Utilizing the Icelandic population-based registers to identify all residents living in the vicinity of  
18  
19 Eyjafjallajökull, the aim of this study was to investigate their self-reported physical and mental  
20  
21 health six to nine months after the volcanic eruption. We hypothesized that residents of the  
22  
23 Eyjafjallajökull area, particularly those most exposed, would be at increased risk of physical and  
24  
25 psychological symptoms compared to a non-exposed population in North Iceland.  
26  
27  
28  
29  
30  
31  
32  
33  
34  
35  
36  
37  
38  
39  
40  
41  
42  
43  
44  
45  
46  
47  
48  
49  
50  
51  
52  
53  
54  
55  
56  
57  
58  
59  
60



## Methods

### Study area

The exposed area in South Iceland is mostly farmland with a few villages. It has several active volcanoes<sup>19</sup> which along with sand plains and river beds are a source of dust storms.<sup>20, 21</sup> Apart from traffic on the national highway and agricultural activities, there are no major sources of anthropogenic particles in the area.

Almost from the onset of the eruption, the Environment Agency of Iceland monitored concentrations of inhalable particulate matter (PM<sub>10</sub>) in up to three locations in the study area. The official health limit for PM<sub>10</sub>, 50 µg/m<sup>3</sup> daily averages, was surpassed more than half of the days between May 7<sup>th</sup> and June 6<sup>th</sup> 2010, when air quality was continuously monitored in the most severely affected areas.<sup>4</sup> Monitoring continued after the eruption ended and until the end of our study period (Ultimo March 2011), ash was repeatedly resuspended and the mean 24-hour concentration of PM<sub>10</sub> particles was 41 µg/m<sup>3</sup>. The official health limit of 50 µg/m<sup>3</sup> daily average was exceeded 25 times, mostly during summer and fall of 2010. From November 2010 onwards the number of exceedences declined rapidly.<sup>5</sup>

In addition to a non-exposed control area in North Iceland, the study area was divided into a low, medium and high exposure regions in South Iceland (Figure 1) based on satellite images of the eruption plume (coarse time resolution), information about the emission intensity<sup>3</sup> and observations of ash deposits on the ground.<sup>4,22</sup> Models calculated with FLEXPART show similar ash deposits, ranging from approximately 1000 g/m<sup>2</sup> in the region just south of the volcano, down to about 200 g/m<sup>2</sup> near Vík some 50 km further east.<sup>4</sup>

During the eruption, the prevailing wind was from the north-west, causing the heaviest ash fall south and east of the volcano. While ash deposition was relatively low in the western part of the medium exposure region, the volcano was in full view there and thus these residents were more visually exposed to the volcano than in other regions. The lowland regions south and west of the glacier are prone to flooding and many residents were evacuated because of glacial outburst floods

1  
2 in the first days of the eruption.  
3  
4

5  
6 Study population  
7

8 The study population consisted of all residents in the municipalities closest to Eyjafjallajökull  
9 volcano (pre-defined by postal codes), identified in the population-based registry (Registers  
10 Iceland). Most live in farmlands (n=1207) and the rest in small townships (N=859).<sup>23</sup> By these  
11 means we identified 1,615 inhabitants who were 18-80 years of age, resided in the exposed area  
12 during the eruption, could be reached and spoke Icelandic fluently. In addition, a sample of 697  
13 demographically matched (age, gender, urban/rural habitation) residents from a non-exposed area in  
14 Northern Iceland was included as control group. Sheep and dairy farming are predominant in both  
15 areas.  
16  
17  
18  
19  
20  
21  
22  
23  
24  
25  
26  
27

28 Data collection  
29

30 Initially, all participants in the exposed group received a letter including information about the study  
31 and an invitation to participate. Some days after the letters were sent the recipients were contacted  
32 by telephone and asked whether they were willing to take part, and if so, whether they preferred to  
33 reply on paper or online. Subsequently, questionnaires or email invitations were sent and a week  
34 later a combined thank-you/reminder card was sent by post or e-mail. If needed, the participants  
35 were reminded again by phone. A similar protocol was used for the control group, with the  
36 exception that the introductory letter stated that a questionnaire would be sent a few days later,  
37 unless participation was declined.  
38  
39  
40  
41  
42  
43  
44  
45  
46  
47

48 Questionnaires were sent to the exposed population between November 19<sup>th</sup> and December 28<sup>th</sup>  
49 2010 (six to seven months after the eruption ended) and the last replies were received in March  
50 2011. The control group received questionnaires between January 26<sup>th</sup> and February 4<sup>th</sup> 2011, the  
51 last replies were received in April 2011.  
52  
53  
54  
55

56 The questionnaires contained no information that revealed the identity of the respondent, instead,  
57  
58  
59  
60

1 they had a running number which could be linked to the person's ID number through a list which  
2 was kept separately and securely to enable later follow-up. A few of the returned questionnaires  
3  
4 was kept separately and securely to enable later follow-up. A few of the returned questionnaires  
5  
6 lacked most of the required information and were excluded from the analysis (n=13).  
7  
8  
9

### 10 Questionnaires

11  
12 The questionnaires contained questions concerning demographic background and current well-  
13 being, including various physical and psychological symptoms. We used standard questions from  
14 the screening part of the European Community Respiratory Health questionnaire<sup>24</sup> and assessed  
15 underlying disease by asking "Has a medical doctor ever told you that you had the following  
16 diseases: asthma, heart disease, emphysema, chronic bronchitis or chronic obstructive pulmonary  
17 disease (COPD)" with the response alternatives "Yes" or "No" by each option. To assess recent  
18 symptoms, we asked "Have the following symptoms disrupted your daily activities during the  
19 previous month?" followed by a list of various symptoms from e.g. the respiratory system, skin or  
20 eyes, or relating to pain. We also asked about smoking "Have you ever smoked", "Yes" or "No",  
21 and "Have you smoked during the last month", "Yes" or "No". Questions on regular use of  
22 medication were "Do you take medication regularly, that is, once per week or more often?"  
23 followed by listing asthma medication, analgesics, blood-pressure-lowering medication and sleep  
24 medication/anti-depressants/tranquillizers/medication for other mental health problems. Current  
25 psychological morbidity was evaluated from the General Health Questionnaire-12-item version  
26 (GHQ-12),<sup>25,26</sup> a non-specific screening tool for psychological morbidity which measures anxiety,  
27 loss of self-confidence and social dysfunction.<sup>27</sup> We used a binary cut-off score of >2.  
28  
29  
30  
31  
32  
33  
34  
35  
36  
37  
38  
39  
40  
41  
42  
43  
44  
45  
46  
47  
48  
49

### 50 Database & coding

51  
52 The online survey was built with LimeSurvey.<sup>28</sup> Participants replying online accessed the survey  
53 using a unique identifier sent to them by email. Questionnaire replies on paper were entered into  
54 LimeSurvey according to uniform guidelines set by the researchers.  
55  
56  
57  
58  
59  
60

### Statistical analysis

We first calculated descriptive statistics, contrasting background characteristics in the exposed and non-exposed population using  $\chi^2$  – tests ( $p$  applies to all categories within demographic characteristics). Logistic regression was used to determine odds ratios (ORs) associated with residence in a) the exposed and non-exposed regions and b) the low, medium, or high exposure areas within the exposed region. All models were adjusted for a priori selected variables: age, gender, smoking status (never, former and current), and education level, odds ratios and 95% confidence intervals (CI) were calculated from the outputs. A CI not including 1.0 or a  $p$ -value of 0.05 or less was considered statistically significant. A Venn diagram was drawn to show the interrelationship between key nasal, eye, or upper respiratory symptoms (cough and/or phlegm without having a cold, eye irritation or itch, and sneeze, stuffed, or runny nose). Demographic characteristics, risk factors and comorbidities of those reporting multiple symptoms were explored using  $\chi^2$  – tests and logistic regression.

IBM SPSS 19<sup>29</sup> was used for data analysis. Individuals who had not replied to all relevant questions were excluded from the regression models.

The study was approved by The Icelandic Data Protection Authority (nr. S4878/2010) and The Science Bioethics Committee (nr. VSNb2010080002/03.7), all participants gave informed consent.

## Results

Valid questionnaires were obtained from 1,148 of 1,615 from the exposed population (71%) and 510 of 697 (73%) from the non-exposed population. A higher proportion of the exposed population could not be reached or found (10.8% vs. 7.2%;  $P=0.005$ ), and more refused to participate (17.8% vs. 14.6%;  $P=0.069$ ). The exposed and non-exposed participants were similar with respect to demographic characteristics; age, education levels, and occupational, marital, and financial status (Table 1).

### Analysis 1: Exposed vs. non-exposed

Respiratory symptoms such as waking up with a feeling of tightness in the chest, breathlessness, cough, and phlegm in the last 12 months were more prevalent in the exposed population. After adjusting for sex, age, education, and smoking status, the exposed population was more likely to report symptoms like tightness in chest (OR, 2.0; 95% CI, 1.3-3.0), coughing without a cold (OR, 2.2, CI, 1.6-2.9), and having chronic bronchitis, OR, 1.9 (95% CI, 1.1-3.1) (Table 2). In addition, bothersome physical symptoms during the last month were more common in the exposed population; these were shortness of breath, OR, 2.1 (95% CI, 1.2-3.6), cough (OR, 2.6; 95% 1.7-3.9), phlegm (OR, 2.1; 95% CI, 1.3-3.2), and eye irritation (OR, 2.9; 95% CI, 2.0-4.1). Back pain, myalgia, and insomnia were less prevalent in the exposed population. Psychological morbidity was marginally more common in the exposed population (OR, 1.3; 95% CI, 1.0-1.7), as was the use of blood pressure lowering medication (1.3, 95% CI, 1.0-1.7), while use of analgesics was less common (OR, 0.7; 95% CI, 0.5-1.0) (Table 3).

### Analysis 2: Low, medium, and high exposure

The prevalence of most respiratory symptoms during the last year increased with ash exposure. Adjusting for gender, age, education, and smoking, the likelihood of waking up with a feeling of tightness in the chest was higher in the medium- and high exposure regions, OR, 2.1 (95% CI, 1.0-

1  
2 4.2) and OR, 3.1 (95% CI, 1.5-6.6), respectively. Chronic morning phlegm was only increased in  
3  
4 the high exposure region, OR, 2.3 (95% CI, 1.2-4.4) (Table 4).

5  
6 The experience of recent symptoms increased with exposure; cough (medium exposure OR, 3.6;  
7  
8 95% CI, 1.6-8.1; high exposure OR, 4.5; 95% CI, 2.0-10.2), phlegm (medium exposure OR, 4.2;  
9  
10 95% CI, 1.5-11.8, high exposure OR, 6.0; 95% CI, 2.1-17.1), and insomnia (medium exposure 2.4,  
11  
12 95% CI, 1.2-5.0, high exposure OR, 2.8, 95% CI, 1.3-5.9), (Table 5). No significant associations  
13  
14 were observed between level of exposure and feeling of tightness in the chest, psychological  
15  
16 morbidity, use of analgesic- and blood-pressure lowering drugs, or physician-diagnosed disease,  
17  
18 though a non-significant trend was observed with some outcomes. ORs not adjusted for age, gender,  
19  
20 education or smoking were similar to the adjusted ones.  
21  
22  
23  
24  
25  
26

### 27 **Analysis 3: Multiple symptoms**

28  
29 A subgroup within both populations reported multiple symptoms from nose, eyes, or upper  
30  
31 respiratory organs. The proportion reporting two or more symptoms was larger in the exposed  
32  
33 population than the non-exposed (23.8% vs. 12.9%, data not shown), and there was a significant  
34  
35 overlap in reporting one or more symptoms, see Venn diagram (figure 2). Within the exposed  
36  
37 population the proportion was 13.3% in the low-exposure area, 24.7% in the medium exposure area,  
38  
39 and 26.7% in the high-exposure area. In the exposed area, those who reported multiple key  
40  
41 symptoms were more likely to be female (58.1% female vs. 41.9% male,  $P<0.015$ ), and have  
42  
43 asthma, compared to those with no symptoms (26.9% asthma vs. 3.4% asthma,  $P<0.001$ ).  
44  
45  
46

47 Analyzing the association between exposure and psychological morbidity and adjusting for multiple  
48  
49 symptoms, we found that having multiple symptoms was associated with psychological  
50  
51 morbidity, OR, 4.69 (95% CI, 3.39-6.50), irrespective of exposure level.  
52  
53  
54  
55  
56  
57  
58  
59  
60

## Discussion

Our study found that six to nine months after the Eyjafjallajökull eruption ended the participants from exposed areas reported increased wheezing, cough and phlegm, as well as recent eye and skin irritation. Participants from medium and high exposure regions experienced significantly higher rates of upper respiratory, skin, and eye irritation symptoms than those from the low exposure region. This suggests a dose-dependent relationship of the Eyjafjallajökull ash exposure on physical symptoms.

Many of the recent physical and mental symptoms were only marginally more prevalent in the high than the medium exposure area, indicating that there is a threshold beyond which additional exposure does not result in increased morbidity. Reporting two or more key respiratory symptoms was more common in the exposed population. Compared to the non-exposed, the exposed population reported only marginally higher prevalence of psychological morbidity. However, psychological morbidity was reported to be much higher in the subgroup reporting two or more symptoms, indicating that those with many symptoms represent a more sensitive subgroup within the population which should be especially targeted in preventive actions.

The main strengths of this study, our ability to identify the whole population experiencing a volcanic eruption as well as the high participation rate, both minimize the risk of selection bias. In addition, the internal response rate (answers to specific items) was high. The exposed and non-exposed populations were demographically similar and adjustment for age, gender and education further reduces the risk of confounding. Chronic illness prevalences in this study are comparable between the two areas, suggesting that the environment and occupational exposures are not dissimilar in the two areas, who are both characterized by sheep and dairy farming.

Regarding the limitations of the study, we have no information on the health status of the two populations before the eruption or the health status of non-respondents, and cannot exclude the possibility that the groups may have differed before the eruption. Although the study benefits

1 overall from the high response rate, we have limited information on non-responders and therefore it  
2 remains uncertain to what extent, if at all, attrition affects our comparison across exposure areas.  
3

4 Another limitation of the study is that all symptoms are self-reported which may confer  
5 misclassification of symptoms. However, it is unlikely that this bias differs across exposure  
6 categories.  
7

8 Classification of exposure areas (low, medium, high), which was based on estimated ash fall, may  
9 be imprecise and actual ash exposure may also vary within the exposure areas due to local weather  
10 conditions, terrain, or housing quality. Yet, if our classification is unclear or erroneous, this would  
11 reasonably result in compromised dose-dependent effects seen in our study and rather decrease the  
12 measured effects. It is also possible that exposures other than ash fall, e.g. noise, visibility, or living  
13 in lowlands exposed to glacial outburst floods, are significant contributors to the psychological  
14 morbidity which we observed in this study.  
15

16 The exposed region is varied with respect to population density and occupation; the high exposure  
17 area has a higher proportion of farmers, who spend more time outside, which may exaggerate the  
18 observed difference between the medium- and low exposure areas. On the other hand, residents of  
19 the high exposure area may have been more vigilant in avoiding exposure, which would reduce the  
20 difference between the exposure areas. Data collection for the exposed group went on in November-  
21 December, and January-February for the non-exposed group, which may induce bias with respect to  
22 respiratory symptoms, as the seasonal influenza peaked during February and March in 2011.<sup>30</sup>  
23

24 However, this would attenuate the observed difference seen in respiratory symptoms.  
25

26 Before the eruption of Eyjafjallajökull, dust storms frequently compromised air quality in the  
27 exposed area,<sup>20,21</sup> however, a study from 2004 on Icelandic farmers found no difference in  
28 respiratory symptoms between controls sampled from the national population and farmers, or  
29 among farmers in different regions of Iceland.<sup>31</sup> Chronic disease prevalence is similar in the  
30 exposed and non-exposed areas, further suggesting that the dust storms occurring before the  
31



1 eruption have no lasting effect on people's health. Also, the dose-response character of symptoms  
2 with respect to exposure to the volcano suggests that the symptoms are associated with the eruption.  
3  
4 Our findings of high rates of cough and eye irritation after the eruption are consistent with other  
5  
6 studies, for example the Mount St. Helens eruption, where the number of emergency room visits,  
7  
8 especially for respiratory conditions in those with underlying illness increased three to five-fold in  
9  
10 the weeks following the eruption. Eye irritation was also more common in loggers exposed to  
11  
12 Mount St. Helens ash, and the amount of eye mucus seemed to be dose-dependent on the ash  
13  
14 density.<sup>32</sup>

15  
16  
17  
18  
19  
20 Dose response and threshold effects of urban-type airborne particles on health have been explored  
21  
22 in epidemiological studies,<sup>33</sup> but rarely in humans exposed to volcanic ash. A Japanese study of  
23  
24 asthma treatment and volcanic ash exposure found worsening of symptoms in asthmatics in areas  
25  
26 with more than 100 g/m<sup>2</sup> ash, but not in areas with less ash fall.<sup>34</sup> The psychological morbidity  
27  
28 found in the current study (20-26%) were lower than that found in the survey of the most exposed  
29  
30 area right after the Eyjafjallajökull eruption ended (39%).<sup>7</sup> This may indicate that residents have  
31  
32 somewhat adapted to the strain following the eruption. Although a disaster with more dramatic  
33  
34 consequences, a similar trend was found in a Japanese study of evacuees from a volcanic area  
35  
36 where 66.1% showed signs of psychological morbidity (GHQ-30) six months after evacuation,  
37  
38 while four years later the rate had fallen to 45.6%.<sup>17</sup> In our study, psychological morbidity and  
39  
40 insomnia was most common in the high exposure group, as was the regular intake of medicines for  
41  
42 depression, anxiety, sleep problems, or other mental symptoms. Dose-response trends were found  
43  
44 between psychological morbidity and exposure to the Mount St. Helens eruption,<sup>16</sup> indicating  
45  
46 possible long-term risk of further psychological morbidity in the high exposure group.  
47  
48

49  
50  
51 At this point, we cannot speculate about the effect of financial loss because of damages to property,  
52  
53 this will be addressed in future studies.  
54

55  
56  
57 The results from this study has implications for planners and authorities, as it indicates risk groups  
58  
59 particularly susceptible to adverse reactions after exposure to volcanic ash. Also, the study design  
60

1 and registration of the participants enables follow-up of the exposed group, both directly in a new  
2  
3 study, as well as in hospital, medicines and mortality registers.  
4  
5  
6  
7  
8  
9

## 10 **Conclusions**

11  
12 In this population-based study we documented a high prevalence of respiratory symptoms six to  
13  
14 nine months following the volcanic eruption in Eyjafjallajökull, especially among those most  
15  
16 exposed. Also, subgroups who reported more than one physical symptom were more prone to  
17  
18 experience psychological difficulties. The study reveals that the adverse health effects of a volcanic  
19  
20 eruption may last for many months beyond the eruption and the immediate disaster relief services  
21  
22 provided. This is important for health authorities to bear in mind.  
23  
24

25 These findings give incentive for further studies, e.g. on predictive factors for morbidity, the health  
26  
27 of children, and long-term follow-up. Important knowledge may be gained from such studies to help  
28  
29 develop mitigation measures at future eruptions.  
30  
31  
32  
33  
34  
35  
36  
37  
38  
39  
40  
41  
42  
43  
44  
45  
46  
47  
48  
49  
50  
51  
52  
53  
54  
55  
56  
57  
58  
59  
60

## References

1. Guha-Sapir D, Vos F, Below R. Annual disaster statistical review: Numbers and trends 2010. Louvain-la-Neuve (Belgium): Centre for Research on the Epidemiology of Disasters (CRED); 2011 p. 50. Report No. 280. [2012 March 27]  
[http://www.cred.be/sites/default/files/ADSR\\_2010.pdf](http://www.cred.be/sites/default/files/ADSR_2010.pdf)
2. Lancet. Natural disasters—taking a longer term view. *Lancet*.2011; **377**(9764):439.
3. Stohl A, Prata AJ, Eckhardt S, et al. Determination of time- and height-resolved volcanic ash emissions for quantitative ash dispersion modeling: The 2010 Eyjafjallajökull eruption. *AtmosChemPhys Discuss*. 2011;**11**(2):5541-5588.
4. Thorsteinsson T, Jóhannsson T, Stohl A, et al. High levels of particulate matter in Iceland due to direct ash emissions by the Eyjafjallajökull eruption and resuspension of deposited ash.*J Geophys Res*. 2012;**117**:B00C05. 9PP.
5. Jóhannsson T. Internal Report 2011. Reykjavík, Iceland: Environmental Agency of Iceland; 2012.
6. Gislason SR, Hassenkam T, Nedel S, et al. Characterization of Eyjafjallajökull volcanic ash particles and a protocol for rapid risk assessment.*P Natl Acad Sci USA*. 2011;**108**(18):7307-7312.
7. Carlsen H, Gíslason T, Benediktsdóttir B, et al. A survey of early health effects of the Eyjafjallajökull 2010 eruption in Iceland – a population-based study. *BMJ Open*.2012; **2**.

- 1  
2  
3  
4  
5  
6  
7  
8  
9  
10  
11  
12  
13  
14  
15  
16  
17  
18  
19  
20  
21  
22  
23  
24  
25  
26  
27  
28  
29  
30  
31  
32  
33  
34  
35  
36  
37  
38  
39  
40  
41  
42  
43  
44  
45  
46  
47  
48  
49  
50  
51  
52  
53  
54  
55  
56  
57  
58  
59  
60
8. Bird D, Gísladóttir G. Residents' attitudes and behaviour before and after the 2010 Eyjafjallajökull eruptions—a case study from southern Iceland. *Bulletin of Volcanology*. 2012;**74**(6):1263–79.
9. Horwell C, Baxter P. The respiratory health hazards of volcanic ash: a review for volcanic risk mitigation. *B Volcanol*. 2006;**69**(1):1-24.
10. Yano E, Yokoyama Y, Nishii S. Chronic Pulmonary Effects of Volcanic Ash: An Epidemiologic Study. *Archives of Environmental Health: An International Journal*. 1986;**41**(2):94–9.
11. Buist AS, Bernstein RS, Johnson LR, et al. Evaluation of physical health effects due to volcanic hazards: human studies. *Am J Public Health*. 1986;**76**(Suppl):66-75.
12. Hickling J, Clements M, Weinstein P, et al. Acute health effects of the Mount Ruapehu (New Zealand) volcanic eruption of June 1996. *International Journal of Environmental Health Research*. 1999;**9**(2):97–107.
13. Hansell AL, Horwell CJ, Oppenheimer C. The health hazards of volcanoes and geothermal areas. *Occup Environ Med*. 2006; **63**(2):149-156.
14. Longo BM, Rossignol A, Green JB. Cardiorespiratory health effects associated with sulphurous volcanic air pollution. *Public Health*. 2008;**122**(8):809-820.
15. Durand M, Wilson JG. Spatial analysis of respiratory disease on an urbanized geothermal field. *Envir Res*. 2006;**101**(2):238-245.
16. Shore JH, Tatum EL, Vollmer WM. Evaluation of mental effects of disaster, Mount St. Helens eruption. *Am J Public Health*. 1986;**76**(Suppl):76-83.
17. Ohta Y, Araki K, Kawasaki N, et al. Psychological distress among evacuees of a volcanic eruption in Japan: A follow-up study. *Psychiatry ClinNeurosci*. 2003;**57**(1):105-111.

- 1  
2  
3  
4  
5  
6  
7  
8  
9  
10  
11  
12  
13  
14  
15  
16  
17  
18  
19  
20  
21  
22  
23  
24  
25  
26  
27  
28  
29  
30  
31  
32  
33  
34  
35  
36  
37  
38  
39  
40  
41  
42  
43  
44  
45  
46  
47  
48  
49  
50  
51  
52  
53  
54  
55  
56  
57  
58  
59  
60
18. Small C, Naumann T. The global distribution of human population and recent volcanism. *Glob Environ Chang - Part B: Environmental Hazards*. 2003;**3**(3-4):93-109.
19. Thordarson T, Larsen G. Volcanism in Iceland in historical time: Volcano types, eruption styles and eruptive history. *J Geodyn*. 2007;**43**(1):118-152.
20. Arnalds, Ó. Dust sources and deposition of aeolian materials in Iceland. *Iceland Agricultural Science*. 2010; **23**:3-29.
21. Prospero, JH, Bullard, JE, Hodgkins, R. High-Latitude Dust Over the North Atlantic: Inputs from Icelandic Proglacial Dust Storms. *Science*. 2012;**334**:1078-1082.
22. Larsen G, Höskuldsson Á. Ash layer from Eyjafjallajökull April 17 2010. Reykjavík, Iceland: Institute of Earth Sciences; 2010. [cited 2011 Nov 1]  
[http://jardvis.hi.is/Apps/WebObjects/HI.woa/swdocument/1015817/2010-04-17\\_GLARE+%C3%B6skulag\\_Eyjafj%C3%B6ll.pdf](http://jardvis.hi.is/Apps/WebObjects/HI.woa/swdocument/1015817/2010-04-17_GLARE+%C3%B6skulag_Eyjafj%C3%B6ll.pdf)
23. Statistics Iceland. *Hagstofa Íslands - Talnaefni » Mannfjöldi » PX*. [cited 2011 Sep 1]  
<http://hagstofa.is/Hagtolar/Mannfjoldi/Byggdakjarnar,-postnumer,-hverfi>
24. Burney PG, Luczynska C, Chinn S, et al. The European Community Respiratory Health Survey. *Eur Respir J*. 1994;**7**(5):954-960.
25. Goldberg D, Williams P. *A User's Guide to the General Health Questionnaire*. Oxford: NFER-Nelson Publishing Company Ltd; 1988.
26. Goldberg DP, Gater R, Sartorius N, et al. The Validity of Two Versions of the GHQ in the WHO Study of Mental Illness in General Health Care. *Psychol Med*. 1997;**27**(01):191-197.
27. Hankins M. The reliability of the twelve-item general health questionnaire (GHQ-12) under realistic assumptions. *BMC Public Health*. 2008;**14**(8):355.

- 1  
2  
3  
4  
5  
6  
7  
8  
9  
10  
11  
12  
13  
14  
15  
16  
17  
18  
19  
20  
21  
22  
23  
24  
25  
26  
27  
28  
29  
30  
31  
32  
33  
34  
35  
36  
37  
38  
39  
40  
41  
42  
43  
44  
45  
46  
47  
48  
49  
50  
51  
52  
53  
54  
55  
56  
57  
58  
59  
60
28. Schmitz C, et al. *LimeSurvey*. Germany: Carsten Schmitz; 2010.
  29. IBM. *IBM SPSS statistics version 19*. New York: IBM; 2010.
  30. Gudnason G, Gudnason T. Influenza-like illness this winter. EPI – ICE January-March 2011. 7th ed. Reykjavík, Iceland; 2011 Mar;p2–3.
  31. Sigurdarson ST, Gudmundsson G, Sigurvinsdottir L, et al. Respiratory disorders are not more common in farmers. Results from a study on Icelandic animal farmers. *Respir Med*. 2008 Dec;102(12):1839–43.
  32. Bernstein R, Baxter P, Falk H, et al. Immediate public health concerns and actions in volcanic eruptions: lessons from the Mount St. Helens eruptions, May 18-October 18, 1980. *Am J Public Health*. 1986;76(Suppl):25-38.
  33. Daniels MJ, Dominici F, Samet JM, et al. Estimating Particulate Matter-Mortality Dose-Response Curves and Threshold Levels: An Analysis of Daily Time-Series for the 20 Largest US Cities. *Am J Epidemiol*. 2000;152(5):397-406.
  34. Shimizu Y, Dobashi K, Hisada T, et al. Acute impact of volcanic ash on asthma symptoms and treatment. *Int J ImmunopatholPharmacol*. 2007;20(2)(Suppl):9-14.

1  
2  
3  
4  
5  
6  
7  
8  
9  
10  
11  
12  
13  
14  
15  
16  
17  
18  
19  
20  
21  
22  
23  
24  
25  
26  
27  
28  
29  
30  
31  
32  
33  
34  
35  
36  
37  
38  
39  
40  
41  
42  
43  
44  
45  
46  
47  
48  
49  
50  
51  
52  
53  
54  
55  
56  
57  
58  
59  
60

Figure 1. Map of Iceland and the study areas.

Inserted map of Iceland shows the location of Skagafjörður (non-exposed, control area) in the north and of the exposed area in South Iceland. The larger map of the exposed area shows Eyjafjallajökull (marked with X) and the low, medium and high ash exposure areas.

Figure 2 Venn diagram of exposed and non-exposed participants reporting one or more key symptom six to nine months after the Eyjafjallajökull eruption.

Legend: Eye symptoms; Irritation, itch or other discomfort, Nasal symptoms; Sneeze or runny nose without having a cough, Cough and /or phlegm; Often cough without having a cold, and/or phlegm during winter. The numbers do not add up due to rounding.

**Table 1 Participation and demographic characteristics of the exposed (South Iceland) and non-exposed (North Iceland) populations.**

|                                                                     | <b>Exposed</b><br>% (n/N) | <b>Non-exposed</b><br>% (n/N) | <i>p-value</i> |
|---------------------------------------------------------------------|---------------------------|-------------------------------|----------------|
| <b>Target population (identified in total population registers)</b> | <b>1811</b>               | <b>751</b>                    |                |
| Could not be found or reached                                       | 10.8% (196/1811)          | 7.2% (54/751)                 | 0.01           |
| <b>Study population</b>                                             | <b>1615</b>               | <b>697</b>                    |                |
| Refused to participate                                              | 17.8% (286/1615)          | 14.6% (102/697)               | 0.07           |
| <b>Originally agreed to participate</b>                             | <b>1329</b>               | <b>595</b>                    |                |
| Explained non-participation *                                       | 7.0% (93/1329)            | 6.1% (36/595)                 | 0.44           |
| Un-explained non-participation **                                   | 6.6% (88/1329)            | 8.2% (49/595)                 | 0.20           |
| <b>Response rate (participants/study population)</b>                | <b>71% (1148/1615)</b>    | <b>73% (510/697)</b>          | 0.31           |
| <b>Demographic characteristics</b>                                  |                           |                               |                |
| Male                                                                | 49.0% (562)               | 51.4% (262)                   | 0.36           |
| Female                                                              | 51.0 (586)                | 48.6% (248)                   | 0.36           |
| <b>Age categories</b>                                               |                           |                               |                |
| 18-23                                                               | 11.1% (128/1148)          | 8.2% (42/510)                 | 0.07           |
| 24-30                                                               | 8.6% (99/1148)            | 9.0% 46/510)                  | 0.79           |
| 31-40                                                               | 15.2% (175/1148)          | 14.3% (73/510)                | 0.55           |
| 41-50                                                               | 20.3% (233/1148)          | 21.4% (109/510)               | 0.62           |
| 51-60                                                               | 19.3% (222/1148)          | 22.2% (113/510)               | 0.19           |
| 61-70                                                               | 15.9% (183/1148)          | 16.5% (84/510)                | 0.79           |
| 71- 80                                                              | 9.4% (108/1148)           | 8.4% (43/510)                 | 0.52           |
| <b>Education</b>                                                    |                           |                               |                |
| No formal education                                                 | 5.4% (61/1134)            | 4.8% (24/501)                 | 0.62           |
| Primary education                                                   | 35.9% (407/1134)          | 30.9% (155/501)               | 0.05           |
| Secondary education                                                 | 33.4% (379/1134)          | 37.7% (189/501)               | 0.09           |
| Professional or university education                                | 20.6% (234/1134)          | 23.8% (119/501)               | 0.16           |
| Other education*                                                    | 4.7% (53/1134)            | 2.8% (14/501)                 | 0.08           |
| <b>Marital status</b>                                               |                           |                               |                |
| Married or cohabitating                                             | 72.4% (831/1148)          | 76.6% (391/510)               | 0.07           |
| Single or divorced                                                  | 18.3% (210/1148)          | 15.5% (79/510)                | 0.17           |
| Relationship – no cohabitation                                      | 6.8% (78/1148)            | 4.7% (24/510)                 | 0.10           |
| Widow or widower                                                    | 2.5% (29/1148)            | 3.1% (16/510)                 | 0.48           |



**Table 1 Participation and demographic characteristics of the exposed (South Iceland) and non-exposed (North Iceland) populations (continued)**

|                                     |                   |                    |                          |                         |      |
|-------------------------------------|-------------------|--------------------|--------------------------|-------------------------|------|
| <b>Household size</b>               |                   |                    |                          |                         |      |
| 1 adult                             | 13.8% (151/1096)  |                    |                          | 15.4% (76/494)          | 0.40 |
| 2 adults                            | 51.4% (563/1096)  |                    |                          | 56.1% (277/494)         | 0.40 |
| 3 adults                            | 21.3% (233/1096)  |                    |                          | 18.0% (89/494)          | 0.14 |
| ≥4 adults                           | 13.6% (149/1096)  |                    |                          | 10.5 (52/494)           | 0.09 |
| <b>Occupational status</b>          |                   |                    |                          |                         |      |
| Full time job                       | 60.4% (683/1130)  |                    |                          | 61.0% (310/507)         | 0.79 |
| Part time job                       | 9.1% (103/1130)   |                    |                          | 11.6% (59/507)          | 0.11 |
| Unemployed                          | 3.5% (40/1130)    |                    |                          | 1.2% (6/507)            | 0.01 |
| Student                             | 6.9% (78/1130)    |                    |                          | 5.7% (28/507)           | 0.29 |
| Homemaker or maternity leave        | 9.4% (99/1130)    |                    |                          | 7.8% (40/507)           | 0.56 |
| Retired                             | 6.1% (69/1130)    |                    |                          | 6.3% (32/507)           | 0.87 |
| On disability or sick leave         | 5.1% (58/1130)    |                    |                          | 6.3% (32/507)           | 0.33 |
| <b>Financial situation</b>          |                   |                    |                          |                         |      |
| Very good                           | 4.6% (52/1136)    |                    |                          | 4.3% (22/510)           | 0.81 |
| Good                                | 23.9% (271/1136)  |                    |                          | 26.3% (134/510)         | 0.92 |
| Acceptable (“making ends meet”)     | 55.6% (632/1136)  |                    |                          | 56.1% (286/510)         | 0.87 |
| Bad                                 | 13.5% (153/1136)  |                    |                          | 12.0% (61/510)          | 0.40 |
| Very bad (“indebted or bankruptcy”) | 2.5% (28/1136)    |                    |                          | 1.4% (7/510)            | 0.16 |
|                                     |                   |                    | <b>Exposure areas***</b> | <b>Non-exposed area</b> |      |
| <b>Smoking status</b>               | Low               | Medium             | High                     |                         |      |
| Never smoker                        | 57.2%<br>(87/152) | 58.5%<br>(377/644) | 54.0%<br>(190/352)       | 54.3% (277/510)         | 0.31 |
| Former smoker                       | 28.9%<br>(44/152) | 24.5%<br>(158/644) | 26.1%<br>(92/352)        | 26.3% (134/510)         | 0.69 |
| Current smoker                      | 13.8%<br>(21/152) | 16.9%<br>(109/644) | 19.9%<br>(70/352)        | 19.4% (99/510)          | 0.33 |

\* Dropped out because of the nature of the questions, because they did not think the study applied to them, or because of illness or old age.

\*\* Did not reply, could not be reached for reminders, did not respond to reminders or returned empty questionnaires.

\*\*\* The exposed area was divided into three areas by levels of exposure with regard to magnitude of ash fall, see figure 1. The p-value is based on comparison between the non-exposed and the sum of the exposed area.

Remaining tables are in a separate file as they look better in Landscape format.

See Tables\_Health\_effects\_following\_the\_Eyjafjallajökull\_eruption.docx

Table 2 Risk of respiratory symptoms (ECHRS) in a population exposed to the Eyjafjallajökull volcanic eruption compared to a non-exposed population

|                                            | Non-exposed     | Exposed          | OR             | <i>p</i> |
|--------------------------------------------|-----------------|------------------|----------------|----------|
|                                            | % (n/N)         | % (n/N)          | (95%CI)*       |          |
| Wheezing (last 12 months)                  | 10.2% (51/498)  | 15.9% (177/1110) | 1.8 (1.3-2.5)  | 0.001    |
| If yes, breathlessness at the same time    | 56.3% (27/48)   | 57.0% (94/165)   | 1.2 (0.6-2.4)  | 0.56     |
| If yes, do you wheeze without a cold       | 66.0% (31/47)   | 70.7% (118/167)  | 1.2 (0.6-2.5)  | 0.59     |
| Nocturnal chest tightness (last 12 months) | 6.6 (33/500)    | 12.1% (135/1115) | 2.0 (1.3-3.0)  | 0.003    |
| Breathlessness at rest                     | 5.4% (27/500)   | 7.7% (85/1103)   | 1.4 (0.9-2.3)  | 0.13     |
| Coughing without a cold                    | 15.9% (80/502)  | 28.2% (314/1114) | 2.2 (1.6-2.9)  | <0.001   |
| Nocturnal cough (last 12 months)           | 18.8% (95/504)  | 23.2% (258/1110) | 1.3 (1.0-1.7)  | 0.06     |
| Morning winter cough                       | 11.6% (60/504)  | 12.0% (133/1111) | 1.0 (0.7-1.4)  | 0.99     |
| Nocturnal or daytime winter cough          | 9.2% (46/498)   | 11.0% (121/1105) | 1.3 (0.9-1.8)  | 0.23     |
| If yes, is it chronic**                    | 75.0% (30/40)   | 67.2% (78/116)   | 0.5 (0.2-1.4)  | 0.19     |
| Morning winter phlegm                      | 10.2% (51/500)  | 14.4% (159/1104) | 1.5 (1.1-2.1)  | 0.02     |
| Nocturnal or daytime winter phlegm         | 5.8% (29/497)   | 8.1% (89/1097)   | 1.5 (1.0-2.4)  | 0.08     |
| If yes, is it chronic**                    | 96.4% (27/28)   | 86.9% (73/84)    | 0.3 (0.0-2.4)  | 0.25     |
| Dyspnea                                    | 7.8% (39/498)   | 11.8% (131/1106) | 1.6 (1.1-2.3)  | 0.02     |
| Nasal allergy and hay fever                | 19.1% (96/502)  | 19.1% (213/1116) | 1.1 (0.8-1.4)  | 0.73     |
| Allergic rhinitis                          | 23.0% (115/501) | 29.5% (327/1109) | 1.4 (1.1-1.8)  | 0.007    |
| <b>Physician diagnosed conditions***</b>   |                 |                  |                |          |
| Asthma                                     | 14.3% (71/498)  | 11.9% (132/1111) | 0.8 (0.6-1.1)  | 0.17     |
| Asthma diagnosis was confirmed by an MD    | 85.5% (59/69)   | 95.9% (117/122)  | 3.9 (1.2-12.5) | 0.03     |

|                                              |               |                |               |      |
|----------------------------------------------|---------------|----------------|---------------|------|
| Heart disease                                | 6.2% (31/503) | 8.0% (89/1115) | 1.4 (0.9-2.2) | 0.15 |
| Chronic bronchitis                           | 4.2% (21/503) | 7.0% (78/1107) | 1.9 (1.1-3.1) | 0.02 |
| Emphysema                                    | 2.0% (10/502) | 1.9% (21/1109) | 1.0 (0.5-2.3) | 0.96 |
| Chronic obstructive pulmonary disease (COPD) | 0.8% (4/500)  | 1.3% (14/1105) | 1.7 (0.5-5.2) | 0.36 |

\* Odds ratios (OR) and 95% Confidence interval (CI) from multivariate logistic regression adjusted for age category, sex, education, and smoking status.

\*\* Chronic: more than 3 months per year

\*\*\* Answering "Yes" to "Has a physician ever told that you had (the disease)?"

Table 3 Risk of recent symptoms (physical and psychological), reported diseases and drug use of the exposed and un-exposed region

|                                                   | Non-exposed<br>% (n/N) | Exposed<br>% (n/N) | OR (95% CI)*  | <i>p</i> |
|---------------------------------------------------|------------------------|--------------------|---------------|----------|
| <b>Respiratory symptoms**</b>                     |                        |                    |               |          |
| Shortness of breath                               | 3.5% (17/488)          | 6.7% (72/1074)     | 2.1 (1.2-3.6) | 0.011    |
| Feeling of tightness in chest                     | 1.8% (9/491)           | 3.6% (38 /1070)    | 2.5 (1.1-5.8) | 0.03     |
| <b>Cough and phlegm**</b>                         |                        |                    |               |          |
| Cough                                             | 6.4% (31/488)          | 15.3% (166/1085)   | 2.6 (1.7-3.9) | <0.001   |
| Phlegm                                            | 5.5% (27 /488)         | 11.3% (122/1079)   | 2.1 (1.3-3.2) | <0.001   |
| <b>Irritation symptoms**</b>                      |                        |                    |               |          |
| Dry throat                                        | 3.4% (17/494)          | 10.1% (110/1089)   | 3.1 (1.8-5.3) | <0.001   |
| Eye irritation and itch                           | 8.6% (42/487)          | 20.6% (224/1085)   | 2.9 (2.0-4.1) | <0.001   |
| Skin rash/eczema                                  | 5.1% (25/487)          | 6.2% (67/1075)     | 1.2 (0.8-1.9) | 0.39     |
| <b>Musculoskeletal symptoms**</b>                 |                        |                    |               |          |
| Back pain                                         | 23% (116/494)          | 18.2% (196/1075)   | 0.7 (0.5-0.9) | 0.012    |
| Myalgia                                           | 24.2% (120/496)        | 20.1% (216/1073)   | 0.7 (0.6-1.0) | 0.024    |
| <b>Sleep** and mental health</b>                  |                        |                    |               |          |
| Insomnia                                          | 16.9% (84/497)         | 13.7% (148/1078)   | 0.8 (0.6-1.0) | 0.08     |
| Psychological morbidity***                        | 19.0% (95/500)         | 24.6% (278/1129)   | 1.3 (1.0-1.7) | 0.05     |
| <b>Regular drugs use (at least once per week)</b> |                        |                    |               |          |
| Asthma medication                                 | 4.7% (24/510)          | 3.4% (39/1147)     | 0.7 (0.4-1.1) | 0.12     |
| Analgesics                                        | 11.4 % (58/510)        | 8.7% (100/1147)    | 0.7 (0.5-1.0) | 0.04     |

|                                                                      |                 |                  |               |      |
|----------------------------------------------------------------------|-----------------|------------------|---------------|------|
| Any drug for depression, anxiety, sleeping and other mental symptoms | 14.9% (76/510)  | 12.5% (144/1148) | 0.8 (0.6-1.1) | 0.12 |
| Blood pressure-lowering medication                                   | 19.6% (100/510) | 22.6 (259/1148)  | 1.3 (1.0-1.7) | 0.10 |

\* Odds ratios (OR) and 95% Confidence interval (CI) from multivariate logistic regression adjusted for age category, gender, education and smoking status.

\*\*Answers “Yes, to a moderate extent” or “Yes, to much extent” to the question “Have any of the following symptoms disturbed your daily activities during the last month?”.

\*\*\* Psychological morbidity was derived from GHQ-12 referring to “the previous weeks”, using a binary cut-off score of >2.

Table 4 Risk of respiratory symptoms (ECHRS) in a population exposed to Eyjafjallajökull volcanic eruption by exposure level at the residence.

|                                           | Low exposure* |                | Medium exposure* |                 | High exposure* |                 |
|-------------------------------------------|---------------|----------------|------------------|-----------------|----------------|-----------------|
|                                           | OR            | %              | OR (95%CI)**     | %               | OR (95%CI)**   | %               |
| Wheezing (last 12 months)                 | 1 (ref)       | 14.3% (21/147) | 1.1 (0.6-1.8)    | 14.6% (91/623)  | 1.4 (0.8-2.3)  | 19.1% (65/340)  |
| If yes, breathlessness at the same time   | 1 (ref)       | 47.6% (10/21)  | 1.2 (0.4-3.2)    | 54.5% (48/88)   | 1.8 (0.6-5.4)  | 64.3% (36/56)   |
| If yes, do you wheeze without having a    | 1 (ref)       | 71.4% (15/21)  | 0.8 (0.2- 2.5)   | 67.4% (60/89)   | 1.1 (0.3-3.9)  | 75.4% (43/57)   |
| Nocturnal chest tightness in (last 12 mo) | 1 (ref)       | 6.0% (9/149)   | 2.1 (1.0-4.2)    | 11.4% (71/624)  | 3.1 (1.5-6.6)  | 16.1% (55/342)  |
| Breathlessness at rest                    | 1 (ref)       | 2.7% (4/146)   | 3.3 (1.2-9.3)    | 8.2% (51/619)   | 3.3 (1.1-9.7)  | 8.9% (30/338)   |
| Coughing without having a cold            | 1 (ref)       | 19.5% (29/149) | 2.0 (1.3-3.1)    | 31.1% (194/623) | 1.6 (1.0-2.6)  | 26.6% (91/342)  |
| Nocturnal cough (last 12 months)          | 1 (ref)       | 13.6% (20/147) | 2.1 (1.3-3.5)    | 25.0% (155/619) | 2.0 (1.2-3.4)  | 24.1% (83/344)  |
| Cough in the morning in winter            | 1 (ref)       | 6.7 % (10/149) | 2.2 (1.1-4.3)    | 13.7% (85/620)  | 1.6 (0.8-3.3)  | 11.1% (38/342)  |
| Cough during the day or night in winter   | 1 (ref)       | 7.5% (11/147)  | 1.7 (0.9-3.4)    | 12.1% (75/619)  | 1.3 (0.6-2.7)  | 10.2% (35/342)  |
| If yes, it is chronic***                  | 1 (ref)       | 70.0% (7/10)   | 0.6 (0.1-3.6)    | 63.9% (46/72)   | 1.1 (0.2-6.9)  | 70.6% (24/34)   |
| Morning winter phlegm                     | 1 (ref)       | 8.3% (12/145)  | 1.7 (0.9-3.2))   | 13.7% (85/620)  | 2.3 (1.2-4.4)  | 18.3% (62/339)  |
| Nocturnal or daytime winter phlegm        | 1 (ref)       | 4.9% (7/144)   | 1.5 (0.6-3.3)    | 6.9% (42/613)   | 2.4 (1.0-5.5)  | 11.8% (40/340)  |
| If yes, is it chronic***                  | 1 (ref)       | 85.7% (6/7)    | 0.7 (0.0-20.8)   | 92.5 (37/40)    | 0.5 (0.2-15.7) | 81.1 (30/37)    |
| Dyspnea                                   | 1 (ref)       | 6.7% (10/144)  | 1.9 (1.0-3.7)    | 6.9% (42/613)   | 2.4 (1.2-4.9)  | 11.8% (40/340)  |
| Nasal allergy and hay fever               | 1 (ref)       | 17.2% (25/145) | 1.2 (0.7-1.9)    | 19.4% (122/628) | 1.1 (0.7-1.9)  | 19.2% (66/345)  |
| Allergic rhinitis                         | 1 (ref)       | 22.8% (33/145) | 1.5 (0.9-2.2)    | 29.5% (184/624) | 1.7 (1.1-2.7)  | 32.4% (110/340) |
| <b>Physician diagnosed conditions****</b> |               |                |                  |                 |                |                 |
| Asthma                                    | 1 (ref)       | 17.2% (25/145) | 0.6 (0.4-1.0)    | 10.5% (65/622)  | 0.7 (0.4-1.2)  | 12.3% (42/342)  |

|                                         |         |                |                |               |                |               |
|-----------------------------------------|---------|----------------|----------------|---------------|----------------|---------------|
| Asthma diagnosis was confirmed by an MD | 1 (ref) | 95.5% (21/22)  | 0.3 (0.0-3.2)  | 93.7% (59/63) | Na*****        | 100% (37/37)  |
| Heart disease                           | 1 (ref) | 10.1% (15/149) | 0.8 (0.4-1.4)  | 7.2% (45/628) | 0.8 (0.4-1.7)  | 8.6% (29/338) |
| Chronic bronchitis                      | 1 (ref) | 6.1% (9/147)   | 1.3 (0.6-2.7)  | 6.8% (42/620) | 1.3 (0.6-3.0)  | 7.9% (27/340) |
| Emphysema                               | 1 (ref) | 1.4% (2/146)   | 1.6 (0.3-7.5)  | 1.8% (11/623) | 1.4 (0.3-7.1)  | 2.4% (8/340)  |
| Chronic obstructive pulmonary disease   | 1 (ref) | 0.7% (1/146)   | 2.5 (0.3-20.2) | 1.5% (9/619)  | 1.7 (0.2-14.2) | 1.2% (4/340)  |

\* Regions are seen in figure 1.

\*\* Odds ratios (OR) and 95% Confidence interval (CI) from multivariate logistic regression adjusted for age category, gender, education, and smoking status.

\*\*\* Chronic: more than 3 months per year

\*\*\*\* Answering “Yes” to ”Has a physician ever told that you had (the disease)?“

\*\*\*\*\* Cannot divide with 0.

Table 5 Risk of recent symptoms (physical and psychological), reported diseases and drug use within regions of the exposed area

|                                                   | Low exposure* |                | Medium exposure* |                 | High exposure*  |                |
|---------------------------------------------------|---------------|----------------|------------------|-----------------|-----------------|----------------|
|                                                   | OR (95%CI)**  | %              | OR (95%CI)**     | %               | OR (95%CI)**    | %              |
| <b>Respiratory symptoms***</b>                    |               |                |                  |                 |                 |                |
| Shortness of breath                               | 1 (ref)       | 2.8% (4/144)   | 2.9 (1.0 - 8.5)  | 6.8% (41/600)   | 3.3 (1.1 - 9.9) | 8.2% (27/330)  |
| Feeling of tightness in chest                     | 1 (ref)       | 1.4% (2/145)   | 3.4 (0.8 - 15.1) | 3.9% (23/597)   | 3.1 (0.7-14.5)  | 4.0% (13/328)  |
| <b>Cough and phlegm***</b>                        |               |                |                  |                 |                 |                |
| Cough                                             | 1 (ref)       | 4.9% (7/143)   | 3.6 (1.6- 8.1)   | 15.7% (95/607)  | 4.5 (2.0- 10.2) | 19.1% (64/335) |
| Phlegm                                            | 1 (ref)       | 2.8% (4/142)   | 4.2 (1.5-11.8)   | 10.8% (65/603)  | 6.0 (2.1-17.1)  | 15.9% (53/334) |
| <b>Irritation symptoms***</b>                     |               |                |                  |                 |                 |                |
| Dry throat                                        | 1 (ref)       | 2.1% (3/145)   | 6.7 (2.0-21.6)   | 11.2% (68/608)  | 6.7 (2.0-22.2)  | 11.6% (39/336) |
| Eye irritation and itch                           | 1 (ref)       | 8.3% (12/144)  | 3.4 (1.8-6.5)    | 21.5% (130/606) | 3.6 (1.9-7.0)   | 24.5% (82/335) |
| Skin rash or eczema                               | 1 (ref)       | 2.1% (3/146)   | 3.0 (0.9-10.1)   | 6.0% (36/600)   | 4.3 (1.3-14.3)  | 8.5% (28/329)  |
| <b>Musculoskeletal symptoms***</b>                |               |                |                  |                 |                 |                |
| Back pain                                         | 1 (ref)       | 15.4% (22/143) | 1.3 (0.8-2.1)    | 18.0% (108/599) | 1.2 (0.7-2.1)   | 19.8% (66/333) |
| Myalgia                                           | 1 (ref)       | 16.6% (24/145) | 1.3 (0.8-2.1)    | 20.0% (120/600) | 1.3 (0.8-2.3)   | 22.0% (72/328) |
| <b>Sleep and mental health</b>                    |               |                |                  |                 |                 |                |
| Insomnia***                                       | 1 (ref)       | 6.3% (9/143)   | 2.4 (1.2-5.0)    | 13.8% (83/601)  | 2.8 (1.3-5.9)   | 16.8 (56/334)  |
| Psychological morbidity*****                      | 1 (ref)       | 20.0% (30/150) | 1.2 (0.8-1.9)    | 24.8% (157/634) | 1.3 (0.8-2.1)   | 26.4% (91/345) |
| <b>Regular drugs use (at least once per week)</b> |               |                |                  |                 |                 |                |



|    |                             |         |                |               |                 |               |                |
|----|-----------------------------|---------|----------------|---------------|-----------------|---------------|----------------|
| 1  |                             |         |                |               |                 |               |                |
| 2  |                             |         |                |               |                 |               |                |
| 3  |                             |         |                |               |                 |               |                |
| 4  | Asthma medication           | 1 (ref) | 3.9% (6/152)   | 0.7 (0.3-1.9) | 2.5% (16/644)   | 1.2 (0.4-3.2) | 4.8% (17/352)  |
| 5  |                             |         |                |               |                 |               |                |
| 6  | Analgesics                  | 1 (ref) | 7.2% (11/152)  | 1.5 (0.7-2.9) | 9.0% (58/644)   | 1.2 (0.6-2.6) | 8.8% (31/352)  |
| 7  |                             |         |                |               |                 |               |                |
| 8  | Any drug for depression,    |         |                |               |                 |               |                |
| 9  | anxiety, sleeping and other | 1 (ref) | 5.3% (8/152)   | 3.6 (1.7-7.8) | 13.7% (88/644)  | 2.8 (1.3-6.3) | 13.6% (48/352) |
| 10 | mental symptoms             |         |                |               |                 |               |                |
| 11 |                             |         |                |               |                 |               |                |
| 12 | Blood pressure-lowering     | 1 (ref) | 19.7% (30/152) | 1.7 (1.1-2.8) | 22.8% (147/644) | 1.4 (0.8-2.4) | 23.3% (82/352) |
| 13 | medication                  |         |                |               |                 |               |                |
| 14 |                             |         |                |               |                 |               |                |

15 \* Regions are seen in figure 1.

16 \*\* Odds ratios (OR) and 95% Confidence interval (CI) from multivariate logistic regression adjusted for age category, gender, education and smoking status.

17 \*\*\* Answering “Yes, to a moderate extent” or “Yes, to much extent” to the question “Have any of the following symptoms disturbed your daily activities during the last  
18 month?”.

19 \*\*\*\* Psychological morbidity was derived from GHQ-12 referring to “the previous weeks”, using a binary cut-off score of >2.

# Health effects following the Eyjafjallajökull volcanic eruption– a population-based study

Hanne Krage Carlsen\*, Arna Hauksdóttir\*, Unnur Anna Valdimarsdóttir, Þórarinn Gíslason, Gunnlaug Einarsdóttir, Halldór Runólfsson, Haraldur Briem, Ragnhildur Finnbjörnsdóttir, Sigurður Guðmundsson, Þórir Björn Kolbeinsson, Þröstur Þorsteinsson and Guðrún **Pétursdóttir**

*\*Hanne Krage Carlsen and Arna Hauksdóttir share responsibility as first authors*

Centre of Public Health Sciences, University of Iceland, 101 Reykjavík, Iceland & Department of Occupational and Environmental Medicine, University of Umeå, Sweden, 901 87 Umeå, Sweden

**Hanne Krage Carlsen\*** PhD candidate Centre of Public Health Sciences, University of Iceland, 101 Reykjavík, Iceland **Arna Hauksdóttir \*** assistant professor Centre of Public Health Sciences, University of Iceland, 101 Reykjavík, Iceland **Unnur Anna Valdimarsdóttir** associate professor Faculty of Medicine, School of Health Sciences, University of Iceland, 102 Reykjavík, Iceland **Þórarinn (Thorarinn) Gíslason** professor, MD The Environment Agency of Iceland, 108 Reykjavík, Iceland **Gunnlaug Einarsdóttir** director MAST – Icelandic Food and Veterinary Authority, 800 Selfoss, Iceland **Halldór Runólfsson** Chief veterinarian The Directorate of Health, 101 Reykjavík, Iceland **Haraldur Briem** Chief Epidemiologist Centre of Public Health Sciences, University of Iceland, 101 Reykjavík, Iceland **Ragnhildur Finnbjörnsdóttir** PhD candidate School of Health Sciences, University of Iceland, Vatnsmyrarvegur 16, 102 Reykjavík, Iceland **Sigurður Guðmundsson** professor Dean The Health Care Institution of South Iceland, 800 Selfoss, Iceland **Þórir (Thorir) Björn Kolbeinsson** MD Head physician Environment and Natural Resources & Institute of Earth Sciences, University of Iceland, 101 Reykjavík, Iceland **Þröstur (Throstur) Þorsteinsson (Thorsteinsson)** associate professor Institute for Sustainability Studies, University of Iceland, 101 Reykjavík, Iceland **Guðrún Pétursdóttir** associate professor, Director

1  
2  
3  
4  
5  
6 Correspondence to:

7 G Pétursdóttir [gudrun@hi.is](mailto:gudrun@hi.is)

8 Institute for Sustainability Studies, University of Iceland,

9 Gimli v/Sæmundargötu,

10 101 Reykjavík, Iceland

11 Telephone number: +354 4724

12 Cell: +354 820 05 75

13 Fax: +354 552 13 31

14  
15  
16  
17  
18  
19  
20 *Statements*

21 “The Corresponding Author has the right to grant on behalf of all authors and does grant on behalf  
22 of all authors, a worldwide licence to the Publishers and its licensees in perpetuity, in all forms,  
23 formats and media (whether known now or created in the future), to i) publish, reproduce,  
24 distribute, display and store the Contribution, ii) translate the Contribution into other languages,  
25 create adaptations, reprints, include within collections and create summaries, extracts and/or,  
26 abstracts of the Contribution, iii) create any other derivative work(s) based on the Contribution, iv)  
27 to exploit all subsidiary rights in the Contribution, v) the inclusion of electronic links from the  
28 Contribution to third party material where-ever it may be located; and, vi) licence any third party to  
29 do any or all of the above.”

30  
31  
32  
33  
34  
35  
36  
37  
38 All the authors conceived and designed the study and had full access to the data. AH, UAV, ÞBK, and GP  
39 gathered the data and HKC, AH, UAV, and GP did the statistical analyses. ÞÞ provided estimates of ash  
40 fall density. HKC and AH drafted the article, which was critically revised by all the authors, who also  
41 approved the final report. GP (guarantor) supervised the study, had full access to all the data in the study  
42 and carries the final responsibility for deciding to submit it for publication, and takes responsibility for  
43 the integrity of the data and the accuracy of the data analysis.

44  
45  
46  
47  
48  
49  
50 The participants of this study gave informed consent before participating in the study. The consent  
51 includes future follow-up, by questionnaire or in registers.

52  
53 None of the authors have conflicts of interests or competing interests to declare.

54  
55 The study was approved by The Icelandic Data Protection Authority (nr. S4878/2010) and The  
56 Science Bioethics Committee (nr. VSNb2010080002/03.7).

57  
58 The study and article was funded through a grant from the Icelandic Government, the funding source had  
59

1 no influence on the design, analysis or reporting of this study.

2 We do not wish to share the data used in this study.

3 We thank Hildur Friðriksdóttir, M.A. (University of Iceland) for administrative support.

4 Last but not least, we thank the participants for their cooperation.

5  
6  
7  
8  
9  
10  
11  
12  
13  
14  
15  
16  
17  
18  
19  
20  
21  
22  
23  
24  
25  
26  
27  
28  
29  
30  
31  
32  
33  
34  
35  
36  
37  
38  
39  
40  
41  
42  
43  
44  
45  
46  
47  
48  
49  
50  
51  
52  
53  
54  
55  
56  
57  
58  
59  
60

For peer review only

## Abstract

**Objectives** The study aimed to determine whether exposure to a volcanic eruption was associated with increased rates of physical and/or mental symptoms.

**Design** Cohort, with non-exposed control group.

**Setting** Natural disasters like volcanic eruptions constitute a major public health threat. The Icelandic volcano Eyjafjallajökull exposed residents in southern Iceland to continuous ash fall for more than 5 weeks in spring 2010. This study was conducted November 2010-March 2011, six to nine months after the Eyjafjallajökull eruption.

**Participants** Adult (18-80 years of age) eruption-exposed South Icelanders (n=1,148) and a control population of residents of Skagafjörður, North Iceland (n=510). The participation rate was 72%.

**Main Outcome Measures** Physical symptoms in the previous year (chronic), in the previous month (recent), General Health Questionnaire (GHQ-12) measured psychological morbidity.

**Results** The likelihood of having symptoms during the last month was higher in the exposed population, such as; tightness in the chest (odds ratio (OR) 2.5; 95% CI, 1.1-5.8), cough (OR, 2.6; 95% CI, 1.7-3.9), phlegm (OR, 2.1; 95% CI, 1.3-3.2), eye irritation (OR, 2.9; 95% CI, 2.0-4.1), and psychological morbidity symptoms (OR, 1.3; 95% CI, 1.0-1.7). Respiratory symptoms during the last 12 months were also more common in the exposed population; cough (OR, 2.2; 95% CI, 1.6-2.9), dyspnea (OR, 1.6; 95% CI, 1.1-2.3), although the prevalence of underlying asthma and heart disease was similar. Twice as many in the exposed population had two or more symptoms from nose, eyes, or upper-respiratory tract (24% vs. 13%,  $p < 0.001$ ); these individuals were also more likely to experience psychological morbidity (OR, 4.69; 95% CI, 3.39-6.50) compared to individuals with no symptoms. Most symptoms exhibited a dose-response pattern within the exposed population, corresponding to low, medium, and high exposure to the eruption.

**Conclusions** Six to nine months after the Eyjafjallajökull eruption, residents living in the exposed area, particularly those closest to the volcano, had markedly increased prevalence of various physical symptoms. A portion of the exposed population reported multiple symptoms and may be at

1 risk for long-term physical and psychological morbidity. Studies of long-term consequences are  
2  
3 therefore warranted.  
4  
5  
6  
7  
8

9  
10 **What this paper adds:**

11 What is already known:

12 Natural disasters like volcanic eruptions constitute a major public health threat. Exposure to  
13 volcanic ash may affect respiratory health.  
14  
15

16 What this paper adds:

17 A larger population-based cohort with a control group was assessed with questionnaires and  
18 increased rates of respiratory and mental health symptoms were found some six months after  
19 exposure to a volcanic eruption, indicating that health effects may be long-lasting.  
20  
21  
22  
23  
24  
25  
26  
27  
28  
29  
30  
31  
32  
33  
34  
35  
36  
37  
38  
39  
40  
41  
42  
43  
44  
45  
46  
47  
48  
49  
50  
51  
52  
53  
54  
55  
56  
57  
58  
59  
60

## Introduction

Throughout history, human societies have been exposed to natural disasters like volcanic eruptions and earthquakes. In 2010, 300 000 individuals were killed worldwide in natural disasters.<sup>1</sup> Accurate information on mortality and long-term health consequences of natural disasters is instrumental to strengthen risk management and decrease their negative health impact.<sup>2</sup>

The eruption of the Eyjafjallajökull volcano in Iceland, which lasted from April 14<sup>th</sup> to May 20<sup>th</sup> 2010, made headlines worldwide, not least because of extensive effects on international flight traffic. Direct ash fall from the eruption was estimated at around 250 million tons, the rural regions in Iceland south and south-east of the volcano were most severely affected.<sup>3,4</sup> Ash fall was continuous for about 6 weeks, and following the eruption the ash was frequently resuspended in the area.<sup>4,5</sup> The surface of the fresh ash particles contained reactive salts and as much as 20% of the particles (by mass) were less than 10 µm in aerodynamic diameter and could enter the lower respiratory tract.<sup>6</sup> A study of local residents (N=207) was conducted immediately after the eruption ended. Participants were examined by a physician and to ascertain respiratory health, standardized spirometry was performed before and after bronchodilator usage. Adult participants also answered questionnaires about mental and physical health. Ash exposure was associated with high prevalence of eye- and upper airway irritation (25% and 50% respectively), and exacerbation of pre-existing asthma but did not contribute to serious health problems or impair respiratory function compared to controls. 39% showed symptoms of psychological morbidity as measured by the General Health Questionnaire (GHQ).<sup>7</sup> Residents from the region east of Eyjafjallajökull have expressed a need for more detailed information concerning ash fall during the eruption as the health effects were not known.<sup>8</sup> Meanwhile, the impact on long-term health of the residents remains to be explored. Previous studies on volcanic ash exposure and health have shown increased respiratory morbidity and asthma attacks,<sup>9,10</sup> and increased hospital visits for respiratory illness in association with some eruptions<sup>11</sup> but not in others.<sup>12</sup> Also, increased irritation of the respiratory tract from short-term exposure to volcanic gases and ash.<sup>13</sup> Long-term exposure to sulphuric gases (often emitted in

1 volcanic eruptions) were found to be associated with increased prevalence of chronic bronchitis and  
2  
3 cardio-respiratory symptoms in some studies.<sup>14,15</sup> In addition to direct physical health hazards,  
4  
5 experiencing floods, lahars, as well as being exposed to prolonged ash suspension can be a threat to  
6  
7 mental health. Stress levels may increase dramatically and have been shown to contribute to  
8  
9 psychological morbidity such as post traumatic stress syndrome or depression.<sup>16,17</sup>  
10  
11 Health effects of long-term exposure to a volcanic eruption are important both from a scientific and  
12  
13 health care standpoint.<sup>18</sup> Iceland's population-based registries and strong infrastructure present an  
14  
15 important opportunity to study such health impacts, particularly in terms of long-term follow-up.  
16  
17 Utilizing the Icelandic population-based registers to identify all residents living in the vicinity of  
18  
19 Eyjafjallajökull, the aim of this study was to investigate their self-reported physical and mental  
20  
21 health six to nine months after the volcanic eruption. We hypothesized that residents of the  
22  
23 Eyjafjallajökull area, particularly those most exposed, would be at increased risk of physical and  
24  
25 psychological symptoms compared to a non-exposed population in North Iceland.  
26  
27  
28  
29  
30  
31  
32  
33  
34  
35  
36  
37  
38  
39  
40  
41  
42  
43  
44  
45  
46  
47  
48  
49  
50  
51  
52  
53  
54  
55  
56  
57  
58  
59  
60



## Methods

### Study area

The exposed area in South Iceland is mostly farmland with a few villages. It has several active volcanoes<sup>19</sup> which along with sand plains and river beds are a source of dust storms.<sup>20, 21</sup> Apart from traffic on the national highway and agricultural activities, there are no major sources of anthropogenic particles in the area.

Almost from the onset of the eruption, the Environment Agency of Iceland monitored concentrations of inhalable particulate matter (PM<sub>10</sub>) in up to three locations in the study area. The official health limit for PM<sub>10</sub>, 50 µg/m<sup>3</sup> daily averages, was surpassed more than half of the days between May 7<sup>th</sup> and June 6<sup>th</sup> 2010, when air quality was continuously monitored in the most severely affected areas.<sup>4</sup> Monitoring continued after the eruption ended and until the end of out study period (Ultimo March 2011), ash was repeatedly resuspended and the mean 24-hour concentration of PM<sub>10</sub> particles was 41 µg/m<sup>3</sup>. The official health limit of 50 µg/m<sup>3</sup> daily average was exceeded 25 times, mostly during summer and fall of 2010. From November 2010 onwards the number of exceedences declined rapidly.<sup>5</sup>

In addition to a non-exposed control area in North Iceland, the study area was divided into a low, medium and high exposure regions in South Iceland (Figure 1) based on satellite images of the eruption plume (coarse time resolution), information about the emission intensity<sup>3</sup> and observations of ash deposits on the ground.<sup>4,22</sup> Models calculated with FLEXPART show similar ash deposits, ranging from approximately 1000 g/m<sup>2</sup> in the region just south of the volcano, down to about 200 g/m<sup>2</sup> near Vík some 50 km further east.<sup>4</sup>

During the eruption, the prevailing wind was from the north-west, causing the heaviest ash fall south and east of the volcano. While ash deposition was relatively low in the western part of the medium exposure region, the volcano was in full view there and thus these residents were more visually exposed to the volcano than in other regions. The lowland regions south and west of the glacier are prone to flooding and many residents were evacuated because of glacial outburst floods

1  
2 in the first days of the eruption.  
3  
4

### 5 6 Study population 7

8 The study population consisted of all residents in the municipalities closest to Eyjafjallajökull  
9 volcano (pre-defined by postal codes), identified in the population-based registry (Registers  
10 Iceland). Most live in farmlands (n=1207) and the rest in small townships (N=859).<sup>23</sup> By these  
11 means we identified 1,615 inhabitants who were 18-80 years of age, resided in the exposed area  
12 during the eruption, could be reached and spoke Icelandic fluently. In addition, a sample of 697  
13 demographically matched (age, gender, urban/rural habitation) residents from a non-exposed area in  
14 Northern Iceland was included as control group. Sheep and dairy farming are predominant in both  
15 areas.  
16  
17  
18  
19  
20  
21  
22  
23  
24  
25  
26  
27

### 28 Data collection 29

30 Initially, all participants in the exposed group received a letter including information about the study  
31 and an invitation to participate. Some days after the letters were sent the recipients were contacted  
32 by telephone and asked whether they were willing to take part, and if so, whether they preferred to  
33 reply on paper or online. Subsequently, questionnaires or email invitations were sent and a week  
34 later a combined thank-you/reminder card was sent by post or e-mail. If needed, the participants  
35 were reminded again by phone. A similar protocol was used for the control group, with the  
36 exception that the introductory letter stated that a questionnaire would be sent a few days later,  
37 unless participation was declined.  
38  
39  
40  
41  
42  
43  
44  
45  
46  
47

48 Questionnaires were sent to the exposed population between November 19<sup>th</sup> and December 28<sup>th</sup>  
49 2010 (six to seven months after the eruption ended) and the last replies were received in March  
50 2011. The control group received questionnaires between January 26<sup>th</sup> and February 4<sup>th</sup> 2011, the  
51 last replies were received in April 2011.  
52  
53  
54  
55

56 The questionnaires contained no information that revealed the identity of the respondent, instead,  
57  
58  
59  
60

1 they had a running number which could be linked to the person's ID number through a list which  
2 was kept separately and securely to enable later follow-up. A few of the returned questionnaires  
3  
4  
5  
6 lacked most of the required information and were excluded from the analysis (n=13).  
7  
8  
9

### 10 Questionnaires

11  
12 The questionnaires contained questions concerning demographic background and current well-  
13 being, including various physical and psychological symptoms. We used standard questions from  
14 the screening part of the European Community Respiratory Health questionnaire<sup>24</sup> and assessed  
15 underlying disease by asking "Has a medical doctor ever told you that you had the following  
16 diseases: asthma, heart disease, emphysema, chronic bronchitis or chronic obstructive pulmonary  
17 disease (COPD)" with the response alternatives "Yes" or "No" by each option. To assess recent  
18 symptoms, we asked "Have the following symptoms disrupted your daily activities during the  
19 previous month?" followed by a list of various symptoms from e.g. the respiratory system, skin or  
20 eyes, or relating to pain. We also asked about smoking "Have you ever smoked", "Yes" or "No",  
21 and "Have you smoked during the last month", "Yes" or "No". Questions on regular use of  
22 medication were "Do you take medication regularly, that is, once per week or more often?"  
23 followed by listing asthma medication, analgesics, blood-pressure-lowering medication and sleep  
24 medication/anti-depressants/tranquillizers/medication for other mental health problems. Current  
25 psychological morbidity was evaluated from the General Health Questionnaire-12-item version  
26 (GHQ-12),<sup>25,26</sup> a non-specific screening tool for psychological morbidity which measures anxiety,  
27 loss of self-confidence and social dysfunction.<sup>27</sup> We used a binary cut-off score of >2.  
28  
29  
30  
31  
32  
33  
34  
35  
36  
37  
38  
39  
40  
41  
42  
43  
44  
45  
46  
47  
48  
49

### 50 Database & coding

51  
52 The online survey was built with LimeSurvey.<sup>28</sup> Participants replying online accessed the survey  
53 using a unique identifier sent to them by email. Questionnaire replies on paper were entered into  
54 LimeSurvey according to uniform guidelines set by the researchers.  
55  
56  
57  
58  
59  
60

## Statistical analysis

We first calculated descriptive statistics, contrasting background characteristics in the exposed and non-exposed population using  $\chi^2$  – tests ( $p$  applies to all categories within demographic characteristics). Logistic regression was used to determine odds ratios (ORs) associated with residence in a) the exposed and non-exposed regions and b) the low, medium, or high exposure areas within the exposed region. All models were adjusted for **a priori selected variables**: age, gender, smoking status (never, former and current), and education level, odds ratios and 95% confidence intervals (CI) were calculated from the outputs. A CI not including 1.0 or a  $p$ -value of 0.05 or less was considered statistically significant. A Venn diagram was drawn to show the interrelationship between key nasal, eye, or upper respiratory symptoms (cough and/or phlegm without having a cold, eye irritation or itch, and sneeze, stuffed, or runny nose). Demographic characteristics, risk factors and comorbidities of those reporting multiple symptoms were explored using  $\chi^2$  – tests and logistic regression.

IBM SPSS 19<sup>29</sup> was used for data analysis. Individuals who had not replied to all relevant questions were excluded from the regression models.

**The study was approved by The Icelandic Data Protection Authority (nr. S4878/2010) and The Science Bioethics Committee (nr. VSNb2010080002/03.7), all participants gave informed consent.**

## Results

Valid questionnaires were obtained from 1,148 of 1,615 from the exposed population (71%) and 510 of 697 (73%) from the non-exposed population. A higher proportion of the exposed population could not be reached or found (10.8% vs. 7.2%;  $P=0.005$ ), and more refused to participate (17.8% vs. 14.6%;  $P=0.069$ ). The exposed and non-exposed participants were similar with respect to demographic characteristics; age, education levels, and occupational, marital, and financial status (Table 1).

### Analysis 1: Exposed vs. non-exposed

Respiratory symptoms such as waking up with a feeling of tightness in the chest, breathlessness, cough, and phlegm in the last 12 months were more prevalent in the exposed population. After adjusting for sex, age, education, and smoking status, the exposed population was more likely to report symptoms like tightness in chest (OR, 2.0; 95% CI, 1.3-3.0), coughing without a cold (OR, 2.2, CI, 1.6-2.9), and having chronic bronchitis, OR, 1.9 (95% CI, 1.1-3.1) (Table 2). In addition, bothersome physical symptoms during the last month were more common in the exposed population; these were shortness of breath, OR, 2.1 (95% CI, 1.2-3.6), cough (OR, 2.6; 95% 1.7-3.9), phlegm (OR, 2.1; 95% CI, 1.3-3.2), and eye irritation (OR, 2.9; 95% CI, 2.0-4.1). Back pain, myalgia, and insomnia were less prevalent in the exposed population. Psychological morbidity was marginally more common in the exposed population (OR, 1.3; 95% CI, 1.0-1.7), as was the use of blood pressure lowering medication (1.3, 95% CI, 1.0-1.7), while use of analgesics was less common (OR, 0.7; 95% CI, 0.5-1.0) (Table 3).

### Analysis 2: Low, medium, and high exposure

The prevalence of most respiratory symptoms during the last year increased with ash exposure. Adjusting for gender, age, education, and smoking, the likelihood of waking up with a feeling of tightness in the chest was higher in the medium- and high exposure regions, OR, 2.1 (95% CI, 1.0-

1  
2 4.2) and OR, 3.1 (95% CI, 1.5-6.6), respectively. Chronic morning phlegm was only increased in  
3  
4 the high exposure region, OR, 2.3 (95% CI, 1.2-4.4) (Table 4).

5  
6 The **experience of** recent symptoms increased with exposure; cough (medium exposure OR, 3.6;  
7  
8 95% CI, 1.6-8.1; high exposure OR, 4.5; 95% CI, 2.0-10.2), phlegm (medium exposure OR, 4.2;  
9  
10 95% CI, 1.5-11.8, high exposure OR, 6.0; 95% CI, 2.1-17.1), **and** insomnia (medium exposure 2.4,  
11  
12 95% CI, 1.2-5.0, high exposure OR, 2.8, 95% CI, 1.3-5.9), (Table 5). No significant associations  
13  
14 were observed between level of exposure and feeling of tightness in the chest, psychological  
15  
16 morbidity, use of analgesic- and blood-pressure lowering drugs, or physician-diagnosed disease,  
17  
18 though a non-significant trend was observed with some outcomes. **ORs not adjusted for age, gender,**  
19  
20 **education or smoking were similar to the adjusted ones.**  
21  
22  
23  
24  
25  
26

### 27 **Analysis 3: Multiple symptoms**

28  
29 A subgroup within both populations reported multiple symptoms from nose, eyes, or upper  
30  
31 respiratory organs. The proportion reporting two or more symptoms was larger in the exposed  
32  
33 population than the non-exposed (23.8% vs. 12.9%, data not shown), **and there was a significant**  
34  
35 **overlap in reporting one or more symptoms, see Venn diagram** (figure 2). Within the exposed  
36  
37 population the proportion was 13.3% in the low-exposure area, 24.7% in the medium exposure area,  
38  
39 and 26.7% in the high-exposure area. In the exposed area, those who reported multiple key  
40  
41 symptoms were more likely to be female (58.1% female vs. 41.9% male,  $P<0.015$ ), and have  
42  
43 asthma, compared to those with no symptoms (26.9% asthma vs. 3.4% asthma,  $P<0.001$ ).  
44  
45  
46

47  
48 Analyzing the association between exposure and psychological morbidity and adjusting for multiple  
49  
50 symptoms, we found that having multiple symptoms was associated with psychological  
51  
52 morbidity, OR, 4.69 (95% CI, 3.39-6.50), irrespective of exposure level.  
53  
54  
55  
56  
57  
58  
59  
60

## Discussion

Our study found that six to nine months after the Eyjafjallajökull eruption ended the participants from exposed areas reported increased wheezing, cough and phlegm, as well as recent eye and skin irritation. Participants from medium and high exposure regions experienced significantly higher rates of upper respiratory, skin, and eye irritation symptoms than those from the low exposure region. This suggests a dose-dependent relationship of the Eyjafjallajökull ash exposure on physical symptoms.

Many of the recent physical and mental symptoms were only marginally more prevalent in the high than the medium exposure area, indicating that there is a threshold beyond which additional exposure does not result in increased morbidity. Reporting two or more key respiratory symptoms was more common in the exposed population. Compared to the non-exposed, the exposed population reported only marginally higher prevalence of psychological morbidity. However, psychological morbidity was reported to be much higher in the subgroup reporting two or more symptoms, indicating that those with many symptoms represent a more sensitive subgroup within the population which should be especially targeted in preventive actions.

The main strengths of this study, our ability to identify the whole population experiencing a volcanic eruption as well as the high participation rate, both minimize the risk of selection bias. In addition, the internal response rate (answers to specific items) was high. The exposed and non-exposed populations were demographically similar and adjustment for age, gender and education further reduces the risk of confounding. Chronic illness prevalences in this study are comparable between the two areas, suggesting that the environment and occupational exposures are not dissimilar in the two areas, who are both characterized by sheep and dairy farming.

Regarding the limitations of the study, we have no information on the health status of the two populations before the eruption or the health status of non-respondents, and cannot exclude the possibility that the groups may have differed before the eruption. Although the study benefits

1 overall from the high response rate, we have limited information on non-responders and therefore it  
2 remains uncertain to what extent, if at all, attrition affects our comparison across exposure areas.  
3

4 Another limitation of the study is that all symptoms are self-reported which may confer  
5 misclassification of symptoms. However, it is unlikely that this bias differs across exposure  
6 categories.  
7

8 Classification of exposure areas (low, medium, high), which was based on estimated ash fall, may  
9 be imprecise and actual ash exposure may also vary within the exposure areas due to local weather  
10 conditions, terrain, or housing quality. Yet, if our classification is unclear or erroneous, this would  
11 reasonably result in compromised dose-dependent effects seen in our study and rather decrease the  
12 measured effects. It is also possible that exposures other than ash fall, e.g. noise, visibility, or living  
13 in lowlands exposed to glacial outburst floods, are significant contributors to the psychological  
14 morbidity which we observed in this study.  
15

16 The exposed region is varied with respect to population density and occupation; the high exposure  
17 area has a higher proportion of farmers, who spend more time outside, which may exaggerate the  
18 observed difference between the medium- and low exposure areas. On the other hand, residents of  
19 the high exposure area may have been more vigilant in avoiding exposure, which would reduce the  
20 difference between the exposure areas. Data collection for the exposed group went on in November-  
21 December, and January-February for the non-exposed group, which may induce bias with respect to  
22 respiratory symptoms, as the seasonal influenza peaked during February and March in 2011.<sup>30</sup>  
23

24 However, this would attenuate the observed difference seen in respiratory symptoms.  
25

26 Before the eruption of Eyjafjallajökull, dust storms frequently compromised air quality in the  
27 exposed area,<sup>20,21</sup> however, a study from 2004 on Icelandic farmers found no difference in  
28 respiratory symptoms between controls sampled from the national population and farmers, or  
29 among farmers in different regions of Iceland.<sup>31</sup> Chronic disease prevalence is similar in the  
30 exposed and non-exposed areas, further suggesting that the dust storms occurring before the  
31



1 eruption have no lasting effect on people's health. Also, the dose-response character of symptoms  
2  
3  
4 with respect to exposure to the volcano suggests that the symptoms are associated with the eruption.  
5  
6 Our findings of high rates of cough and eye irritation after the eruption are consistent with other  
7  
8 studies, for example the Mount St. Helens eruption, where the number of emergency room visits,  
9  
10 especially for respiratory conditions in those with underlying illness increased three to five-fold in  
11  
12 the weeks following the eruption. Eye irritation was also more common in loggers exposed to  
13  
14 Mount St. Helens ash, and the amount of eye mucus seemed to be dose-dependent on the ash  
15  
16 density.<sup>32</sup>

17  
18  
19  
20 Dose response and threshold effects of urban-type airborne particles on health have been explored  
21  
22 in epidemiological studies,<sup>33</sup> but rarely in humans exposed to volcanic ash. A Japanese study of  
23  
24 asthma treatment and volcanic ash exposure found worsening of symptoms in asthmatics in areas  
25  
26 with more than 100 g/m<sup>2</sup> ash, but not in areas with less ash fall.<sup>34</sup> The psychological morbidity  
27  
28 found in the current study (20-26%) were lower than that found in the survey of the most exposed  
29  
30 area right after the Eyjafjallajökull eruption ended (39%).<sup>7</sup> This may indicate that residents have  
31  
32 somewhat adapted to the strain following the eruption. Although a disaster with more dramatic  
33  
34 consequences, a similar trend was found in a Japanese study of evacuees from a volcanic area  
35  
36 where 66.1% showed signs of psychological morbidity (GHQ-30) six months after evacuation,  
37  
38 while four years later the rate had fallen to 45.6%.<sup>17</sup> In our study, psychological morbidity and  
39  
40 insomnia was most common in the high exposure group, as was the regular intake of medicines for  
41  
42 depression, anxiety, sleep problems, or other mental symptoms. Dose-response trends were found  
43  
44 between psychological morbidity and exposure to the Mount St. Helens eruption,<sup>16</sup> indicating  
45  
46 possible long-term risk of further psychological morbidity in the high exposure group.

47  
48  
49  
50  
51 At this point, we cannot speculate about the effect of financial loss because of damages to property,  
52  
53 this will be addressed in future studies.

54  
55  
56  
57 The results from this study has implications for planners and authorities, as it indicates risk groups  
58  
59 particularly susceptible to adverse reactions after exposure to volcanic ash. Also, the study design

1 and registration of the participants enables follow-up of the exposed group, both directly in a new  
2  
3 study, as well as in hospital, medicines and mortality registers.  
4  
5  
6  
7  
8  
9

## 10 **Conclusions**

11  
12 In this population-based study we documented a high prevalence of respiratory symptoms six to  
13  
14 nine months following the volcanic eruption in Eyjafjallajökull, especially among those most  
15  
16 exposed. Also, subgroups who reported more than one physical symptom were more prone to  
17  
18 experience psychological difficulties. The study reveals that the adverse health effects of a volcanic  
19  
20 eruption may last for many months beyond the eruption and the immediate disaster relief services  
21  
22 provided. This is important for health authorities to bear in mind.  
23  
24

25 These findings give incentive for further studies, e.g. on predictive factors for morbidity, the health  
26  
27 of children, and long-term follow-up. Important knowledge may be gained from such studies to help  
28  
29 develop mitigation measures at future eruptions.  
30  
31  
32  
33  
34  
35  
36  
37  
38  
39  
40  
41  
42  
43  
44  
45  
46  
47  
48  
49  
50  
51  
52  
53  
54  
55  
56  
57  
58  
59  
60

## References

1. Guha-Sapir D, Vos F, Below R. Annual disaster statistical review: Numbers and trends 2010. Louvain-la-Neuve (Belgium): Centre for Research on the Epidemiology of Disasters (CRED): 2011 p. 50. Report No. 280. [2012 March 27]  
[http://www.cred.be/sites/default/files/ADSR\\_2010.pdf](http://www.cred.be/sites/default/files/ADSR_2010.pdf)
2. Lancet. Natural disasters—taking a longer term view. *Lancet*.2011; **377**(9764):439.
3. Stohl A, Prata AJ, Eckhardt S, Clarisse L, Durant A, Henne S, et al. Determination of time- and height-resolved volcanic ash emissions for quantitative ash dispersion modeling: The 2010 Eyjafjallajökull eruption. *AtmosChemPhys Discuss*. 2011;**11**(2):5541-5588.
4. Thorsteinsson T, Jóhannsson T, Stohl A, Kristiansen NI. High levels of particulate matter in Iceland due to direct ash emissions by the Eyjafjallajökull eruption and resuspension of deposited ash. *J Geophys Res*. 2012;**117**:B00C05. 9PP.
5. Jóhannsson T. Internal Report 2011. Reykjavík, Iceland: Environmental Agency of Iceland; 2012.
6. Gislason SR, Hassenkam T, Nedel S, Bovet N, Eiriksdottir ES, Alfredsson HA, et al. Characterization of Eyjafjallajökull volcanic ash particles and a protocol for rapid risk assessment. *P Natl Acad Sci USA*. 2011;**108**(18):7307-7312.
7. Carlsen H, Gíslason T, Benediktsdottir B, Kolbeinsson T, Hauksdottir A, Thorsteinsson T, et al. A survey of early health effects of the Eyjafjallajökull 2010 eruption in Iceland – a population-based study. *BMJ Open*.2012; 2.

- 1  
2  
3  
4  
5  
6  
7  
8. Bird D, Gísladóttir G. Residents' attitudes and behaviour before and after the 2010 Eyjafjallajökull eruptions—a case study from southern Iceland. *Bulletin of Volcanology*. 2012;**74**(6):1263–79.
9. Horwell C, Baxter P. The respiratory health hazards of volcanic ash: a review for volcanic risk mitigation. *B Volcanol*. 2006;**69**(1):1-24.
10. Yano E, Yokoyama Y, Nishii S. Chronic Pulmonary Effects of Volcanic Ash: An Epidemiologic Study. *Archives of Environmental Health: An International Journal*. 1986;**41**(2):94–9.
11. Buist AS, Bernstein RS, Johnson LR, Vollmer WM. Evaluation of physical health effects due to volcanic hazards: human studies. *Am J Public Health*. 1986;**76**(Suppl):66-75.
12. Hickling J, Clements M, Weinstein P, Woodward A. Acute health effects of the Mount Ruapehu (New Zealand) volcanic eruption of June 1996. *International Journal of Environmental Health Research*. 1999;**9**(2):97–107.
13. Hansell AL, Horwell CJ, Oppenheimer C. The health hazards of volcanoes and geothermal areas. *Occup Environ Med*. 2006; **63**(2):149-156.
14. Longo BM, Rossignol A, Green JB. Cardiorespiratory health effects associated with sulphurous volcanic air pollution. *Public Health*. 2008;**122**(8):809-820.
15. Durand M, Wilson JG. Spatial analysis of respiratory disease on an urbanized geothermal field. *Envir Res*. 2006;**101**(2):238-245.
16. Shore JH, Tatum EL, Vollmer WM. Evaluation of mental effects of disaster, Mount St. Helens eruption. *Am J Public Health*. 1986;**76**(Suppl):76-83.
17. Ohta Y, Araki K, Kawasaki N, Nakane Y, Honda S, Mine M. Psychological distress among evacuees of a volcanic eruption in Japan: A follow-up study. *Psychiatry ClinNeurosci*. 2003;**57**(1):105-111.

- 1  
2  
3  
4  
5  
6  
7  
8  
9  
10  
11  
12  
13  
14  
15  
16  
17  
18  
19  
20  
21  
22  
23  
24  
25  
26  
27  
28  
29  
30  
31  
32  
33  
34  
35  
36  
37  
38  
39  
40  
41  
42  
43  
44  
45  
46  
47  
48  
49  
50  
51  
52  
53  
54  
55  
56  
57  
58  
59  
60
18. Small C, Naumann T. The global distribution of human population and recent volcanism. *Glob Environ Chang - Part B: Environmental Hazards*. 2003;**3**(3-4):93-109.
  19. Thordarson T, Larsen G. Volcanism in Iceland in historical time: Volcano types, eruption styles and eruptive history. *J Geodyn*. 2007;**43**(1):118-152.
  20. Arnalds, Ó. Dust sources and deposition of aeolian materials in Iceland. *Iceland Agricultural Science*.2010; **23**:3-29.
  21. Prospero, JH, Bullard, JE, Hodgkins, R. High-Latitude Dust Over the North Atlantic: Inputs from Icelandic Proglacial Dust Storms. *Science*. 2012;**334**:1078-1082.
  22. Larsen G, Höskuldsson Á. Ash layer from Eyjafjallajökull April 17 2010. Reykjavík, Iceland: Institute of Earth Sciences; 2010. [cited 2011 Nov 1]  
[http://jardvis.hi.is/Apps/WebObjects/HI.woa/swdocument/1015817/2010-04-17\\_GLARE+%C3%B6skulag\\_Eyjafj%C3%B6ll.pdf](http://jardvis.hi.is/Apps/WebObjects/HI.woa/swdocument/1015817/2010-04-17_GLARE+%C3%B6skulag_Eyjafj%C3%B6ll.pdf)
  23. Statistics Iceland. *Hagstofa Íslands - Talnaefni » Mannfjöldi » PX*. [cited 2011 Sep 1]  
<http://hagstofa.is/Hagtolar/Mannfjoldi/Byggdakjarnar,-postnumer,-hverfi>
  24. Burney PG, Luczynska C, Chinn S, Jarvis D. The European Community Respiratory Health Survey. *Eur Respir J*. 1994;**7**(5):954-960.
  25. Goldberg D, Williams P. *A User's Guide to the General Health Questionnaire*. Oxford: NFER-Nelson Publishing Company Ltd; 1988.
  26. Goldberg DP, Gater R, Sartorius N, Ustun TB, Piccinelli M, Guree O, et al. The Validity of Two Versions of the GHQ in the WHO Study of Mental Illness in General Health Care. *Psychol Med*. 1997;**27**(01):191-197.

- 1  
2  
3  
4  
5  
6  
7  
8  
9  
10  
11  
12  
13  
14  
15  
16  
17  
18  
19  
20  
21  
22  
23  
24  
25  
26  
27  
28  
29  
30  
31  
32  
33  
34  
35  
36  
37  
38  
39  
40  
41  
42  
43  
44  
45  
46  
47  
48  
49  
50  
51  
52  
53  
54  
55  
56  
57  
58  
59  
60
27. Hankins M. The reliability of the twelve-item general health questionnaire (GHQ-12) under realistic assumptions. *BMC Public Health*. 2008;**14**(8):355.
28. Schmitz C, et al. *LimeSurvey*. Germany: Carsten Schmitz; 2010.
29. IBM. *IBM SPSS statistics version 19*. New York: IBM; 2010.
30. Gudnason G, Gudnason T. Influenza-like illness this winter. EPI – ICE January-March 2011. 7th ed. Reykjavik, Iceland; 2011 Mar;p2–3.
31. Sigurdarson ST, Gudmundsson G, Sigurvinsdottir L, Kline JN, Tomasson K. Respiratory disorders are not more common in farmers. Results from a study on Icelandic animal farmers. *Respir Med*. 2008 Dec;**102**(12):1839–43.
32. Bernstein R, Baxter P, Falk H, Roy I, Foster L, Frost F. Immediate public health concerns and actions in volcanic eruptions: lessons from the Mount St. Helens eruptions, May 18-October 18, 1980. *Am J Public Health*. 1986;**76**(Suppl):25-38.
33. Daniels MJ, Dominici F, Samet JM, Zeger SL. Estimating Particulate Matter-Mortality Dose-Response Curves and Threshold Levels: An Analysis of Daily Time-Series for the 20 Largest US Cities. *Am J Epidemiol*. 2000;**152**(5):397-406.
34. Shimizu Y, Dobashi K, Hisada T, Ono A, Todokoro M, Iijima H, et al. Acute impact of volcanic ash on asthma symptoms and treatment. *Int J ImmunopatholPharmacol*. 2007;**20**(2)(Suppl):9-14.

1  
2  
3  
4  
5  
6  
7  
8  
9  
10  
11  
12  
13  
14  
15  
16  
17  
18  
19  
20  
21  
22  
23  
24  
25  
26  
27  
28  
29  
30  
31  
32  
33  
34  
35  
36  
37  
38  
39  
40  
41  
42  
43  
44  
45  
46  
47  
48  
49  
50  
51  
52  
53  
54  
55  
56  
57  
58  
59  
60

Figure 1. Map of Iceland and the study areas.

Inserted map of Iceland shows the location of Skagafjörður (non-exposed, control area) in the north and of the exposed area in South Iceland. The larger map of the exposed area shows Eyjafjallajökull (marked with X) and the low, medium and high ash exposure areas.

Figure 2 Venn diagram of exposed and non-exposed participants reporting one or more key symptom six to nine months after the Eyjafjallajökull eruption.

Legend: Eye symptoms; Irritation, itch or other discomfort, Nasal symptoms; Sneeze or runny nose without having a cough, Cough and /or phlegm; Often cough without having a cold, and/or phlegm during winter. The numbers do not add up due to rounding.

**Table 1 Participation and demographic characteristics of the exposed (South Iceland) and non-exposed (North Iceland) populations.**

|                                                                     | <b>Exposed</b><br>% (n/N) | <b>Non-exposed</b><br>% (n/N) | <i>p-value</i> |
|---------------------------------------------------------------------|---------------------------|-------------------------------|----------------|
| <b>Target population (identified in total population registers)</b> | <b>1811</b>               | <b>751</b>                    |                |
| Could not be found or reached                                       | 10.8% (196/1811)          | 7.2% (54/751)                 | 0.01           |
| <b>Study population</b>                                             | <b>1615</b>               | <b>697</b>                    |                |
| Refused to participate                                              | 17.8% (286/1615)          | 14.6% (102/697)               | 0.07           |
| <b>Originally agreed to participate</b>                             | <b>1329</b>               | <b>595</b>                    |                |
| Explained non-participation *                                       | 7.0% (93/1329)            | 6.1% (36/595)                 | 0.44           |
| Un-explained non-participation **                                   | 6.6% (88/1329)            | 8.2% (49/595)                 | 0.20           |
| <b>Response rate (participants/study population)</b>                | <b>71% (1148/1615)</b>    | <b>73% (510/697)</b>          | 0.31           |
| <b>Demographic characteristics</b>                                  |                           |                               |                |
| Male                                                                | 49.0% (562)               | 51.4% (262)                   | 0.36           |
| Female                                                              | 51.0 (586)                | 48.6% (248)                   | 0.36           |
| <b>Age categories</b>                                               |                           |                               |                |
| 18-23                                                               | 11.1% (128/1148)          | 8.2% (42/510)                 | 0.07           |
| 24-30                                                               | 8.6% (99/1148)            | 9.0% 46/510)                  | 0.79           |
| 31-40                                                               | 15.2% (175/1148)          | 14.3% (73/510)                | 0.55           |
| 41-50                                                               | 20.3% (233/1148)          | 21.4% (109/510)               | 0.62           |
| 51-60                                                               | 19.3% (222/1148)          | 22.2% (113/510)               | 0.19           |
| 61-70                                                               | 15.9% (183/1148)          | 16.5% (84/510)                | 0.79           |
| 71- 80                                                              | 9.4% (108/1148)           | 8.4% (43/510)                 | 0.52           |
| <b>Education</b>                                                    |                           |                               |                |
| No formal education                                                 | 5.4% (61/1134)            | 4.8% (24/501)                 | 0.62           |
| Primary education                                                   | 35.9% (407/1134)          | 30.9% (155/501)               | 0.05           |
| Secondary education                                                 | 33.4% (379/1134)          | 37.7% (189/501)               | 0.09           |
| Professional or university education                                | 20.6% (234/1134)          | 23.8% (119/501)               | 0.16           |
| Other education*                                                    | 4.7% (53/1134)            | 2.8% (14/501)                 | 0.08           |
| <b>Marital status</b>                                               |                           |                               |                |
| Married or cohabitating                                             | 72.4% (831/1148)          | 76.6% (391/510)               | 0.07           |
| Single or divorced                                                  | 18.3% (210/1148)          | 15.5% (79/510)                | 0.17           |
| Relationship – no cohabitation                                      | 6.8% (78/1148)            | 4.7% (24/510)                 | 0.10           |
| Widow or widower                                                    | 2.5% (29/1148)            | 3.1% (16/510)                 | 0.48           |



**Table 1 Participation and demographic characteristics of the exposed (South Iceland) and non-exposed (North Iceland) populations (continued)**

|                                     |                   |                    |                          |                         |      |
|-------------------------------------|-------------------|--------------------|--------------------------|-------------------------|------|
| <b>Household size</b>               |                   |                    |                          |                         |      |
| 1 adult                             | 13.8% (151/1096)  |                    |                          | 15.4% (76/494)          | 0.40 |
| 2 adults                            | 51.4% (563/1096)  |                    |                          | 56.1% (277/494)         | 0.40 |
| 3 adults                            | 21.3% (233/1096)  |                    |                          | 18.0% (89/494)          | 0.14 |
| ≥4 adults                           | 13.6% (149/1096)  |                    |                          | 10.5 (52/494)           | 0.09 |
| <b>Occupational status</b>          |                   |                    |                          |                         |      |
| Full time job                       | 60.4% (683/1130)  |                    |                          | 61.0% (310/507)         | 0.79 |
| Part time job                       | 9.1% (103/1130)   |                    |                          | 11.6% (59/507)          | 0.11 |
| Unemployed                          | 3.5% (40/1130)    |                    |                          | 1.2% (6/507)            | 0.01 |
| Student                             | 6.9% (78/1130)    |                    |                          | 5.7% (28/507)           | 0.29 |
| Homemaker or maternity leave        | 9.4% (99/1130)    |                    |                          | 7.8% (40/507)           | 0.56 |
| Retired                             | 6.1% (69/1130)    |                    |                          | 6.3% (32/507)           | 0.87 |
| On disability or sick leave         | 5.1% (58/1130)    |                    |                          | 6.3% (32/507)           | 0.33 |
| <b>Financial situation</b>          |                   |                    |                          |                         |      |
| Very good                           | 4.6% (52/1136)    |                    |                          | 4.3% (22/510)           | 0.81 |
| Good                                | 23.9% (271/1136)  |                    |                          | 26.3% (134/510)         | 0.92 |
| Acceptable (“making ends meet”)     | 55.6% (632/1136)  |                    |                          | 56.1% (286/510)         | 0.87 |
| Bad                                 | 13.5% (153/1136)  |                    |                          | 12.0% (61/510)          | 0.40 |
| Very bad “(indebted or bankruptcy)” | 2.5% (28/1136)    |                    |                          | 1.4% (7/510)            | 0.16 |
|                                     |                   |                    | <b>Exposure areas***</b> | <b>Non-exposed area</b> |      |
| <b>Smoking status</b>               | Low               | Medium             | High                     |                         |      |
| Never smoker                        | 57.2%<br>(87/152) | 58.5%<br>(377/644) | 54.0%<br>(190/352)       | 54.3% (277/510)         | 0.31 |
| Former smoker                       | 28.9%<br>(44/152) | 24.5%<br>(158/644) | 26.1%<br>(92/352)        | 26.3% (134/510)         | 0.69 |
| Current smoker                      | 13.8%<br>(21/152) | 16.9%<br>(109/644) | 19.9%<br>(70/352)        | 19.4% (99/510)          | 0.33 |

\* Dropped out because of the nature of the questions, because they did not think the study applied to them, or because of illness or old age.

\*\* Did not reply, could not be reached for reminders, did not respond to reminders or returned empty questionnaires.

\*\*\* The exposed area was divided into three areas by levels of exposure with regard to magnitude of ash fall, see figure 1. The p-value is based on comparison between the non-exposed and the sum of the exposed area.

Remaining tables are in a separate file as they look better in Landscape format.

See Tables\_Health\_effects\_following\_the\_Eyjafjallajökull\_eruption.docx

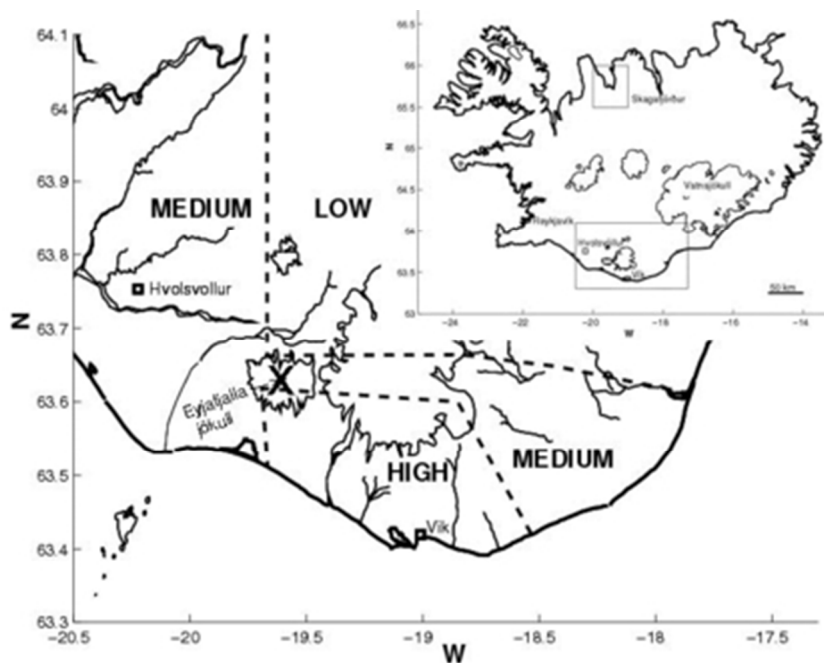

Inserted map of Iceland shows the location of Skagafjörður (non-exposed, control area) in the north and of the exposed area in South Iceland. The larger map of the exposed area shows Eyjafjallajökull (marked with X) and the low, medium and high ash exposure areas.

17x13mm (600 x 600 DPI)

1  
2  
3  
4  
5  
6  
7  
8  
9  
10  
11  
12  
13  
14  
15  
16  
17  
18  
19  
20  
21  
22  
23  
24  
25  
26  
27  
28  
29  
30  
31  
32  
33  
34  
35  
36  
37  
38  
39  
40  
41  
42  
43  
44  
45  
46  
47  
48  
49  
50  
51  
52  
53  
54  
55  
56  
57  
58  
59  
60

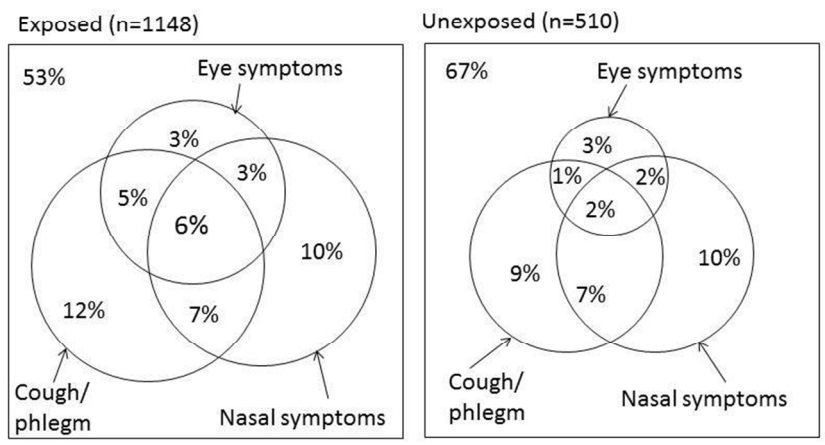

Venn diagram of exposed and non-exposed participants reporting one or more key symptom six to nine months after the Eyjafjallajökull eruption.

Legend: Eye symptoms; Irritation, itch or other discomfort, Nasal symptoms; Sneeze or runny nose without having a cough, Cough and /or phlegm; Often cough without having a cold, and/or phlegm during winter. The numbers do not add up due to rounding. 81x60mm (300 x 300 DPI)

only

STROBE Statement—for Volcano-Health study....page numbers pertain to the submitted manuscript file.

|                           | Item No | Recommendation                                                                                                                                                                                                                                                                                                         |                                                                   |
|---------------------------|---------|------------------------------------------------------------------------------------------------------------------------------------------------------------------------------------------------------------------------------------------------------------------------------------------------------------------------|-------------------------------------------------------------------|
| <b>Title and abstract</b> | 1       | (a) Indicate the study's design with a commonly used term in the title or the abstract<br>(b) Provide in the abstract an informative and balanced summary of what was done and what was found                                                                                                                          | Page 1<br>Abstract page3                                          |
| <b>Introduction</b>       |         |                                                                                                                                                                                                                                                                                                                        |                                                                   |
| Background/rationale      | 2       | Explain the scientific background and rationale for the investigation being reported                                                                                                                                                                                                                                   | P 5                                                               |
| Objectives                | 3       | State specific objectives, including any prespecified hypotheses                                                                                                                                                                                                                                                       | P 7                                                               |
| <b>Methods</b>            |         |                                                                                                                                                                                                                                                                                                                        |                                                                   |
| Study design              | 4       | Present key elements of study design early in the paper                                                                                                                                                                                                                                                                | Page 6(intro)                                                     |
| Setting                   | 5       | Describe the setting, locations, and relevant dates, including periods of recruitment, exposure, follow-up, and data collection                                                                                                                                                                                        | Page 8, data collection                                           |
| Participants              | 6       | (a) Give the eligibility criteria, and the sources and methods of selection of participants. Describe methods of follow-up<br>(b) For matched studies, give matching criteria and number of exposed and unexposed                                                                                                      | Page 9, data collection.<br>Page 8, study population              |
| Variables                 | 7       | Clearly define all outcomes, exposures, predictors, potential confounders, and effect modifiers. Give diagnostic criteria, if applicable                                                                                                                                                                               | Page 9, questionnaire, coding.                                    |
| Data sources/measurement  | 8*      | For each variable of interest, give sources of data and details of methods of assessment (measurement). Describe comparability of assessment methods if there is more than one group                                                                                                                                   | Page 9 (same)                                                     |
| Bias                      | 9       | Describe any efforts to address potential sources of bias                                                                                                                                                                                                                                                              | Page 8 study population                                           |
| Study size                | 10      | Explain how the study size was arrived at                                                                                                                                                                                                                                                                              | P9                                                                |
| Quantitative variables    | 11      | Explain how quantitative variables were handled in the analyses. If applicable, describe which groupings were chosen and why                                                                                                                                                                                           | datacollection/p10 results                                        |
| Statistical methods       | 12      | (a) Describe all statistical methods, including those used to control for confounding<br>(b) Describe any methods used to examine subgroups and interactions<br>(c) Explain how missing data were addressed<br>(d) If applicable, explain how loss to follow-up was addressed<br>(e) Describe any sensitivity analyses | -<br>P10 statistical analysis<br>Page 10, Stat. analys.<br>-<br>- |
| <b>Results</b>            |         |                                                                                                                                                                                                                                                                                                                        |                                                                   |

|                                                                                                                                        |                  |     |                                                                                                                                                                                                                                                                                                                                                                                                                           |                                                  |
|----------------------------------------------------------------------------------------------------------------------------------------|------------------|-----|---------------------------------------------------------------------------------------------------------------------------------------------------------------------------------------------------------------------------------------------------------------------------------------------------------------------------------------------------------------------------------------------------------------------------|--------------------------------------------------|
| 1<br>2<br>3<br>4<br>5<br>6<br>7<br>8<br>9<br>10                                                                                        | Participants     | 13* | (a) Report numbers of individuals at each stage of study—eg numbers potentially eligible, examined for eligibility, confirmed eligible, included in the study, completing follow-up, and analysed<br><hr/> (b) Give reasons for non-participation at each stage<br><hr/> (c) Consider use of a flow diagram                                                                                                               | P1<br>Results/table 1<br><br>Table 1<br><br>-    |
| 11<br>12<br>13<br>14<br>15<br>16<br>17<br>18<br>19<br>20<br>21<br>22<br>23<br>24<br>25<br>26<br>27<br>28<br>29<br>30<br>31<br>32<br>33 | Descriptive data | 14* | (a) Give characteristics of study participants (eg demographic, clinical, social) and information on exposures and potential confounders<br><hr/> (b) Indicate number of participants with missing data for each variable of interest<br><hr/> (c) Summarise follow-up time (eg, average and total amount)                                                                                                                | Table 1 and others<br><br>Ok<br><br>-            |
| 34<br>35<br>36<br>37                                                                                                                   | Outcome data     | 15* | Report numbers of outcome events or summary measures over time                                                                                                                                                                                                                                                                                                                                                            | Tables.                                          |
| 38<br>39<br>40<br>41<br>42<br>43<br>44<br>45<br>46<br>47<br>48<br>49<br>50<br>51<br>52<br>53                                           | Main results     | 16  | (a) Give unadjusted estimates and, if applicable, confounder-adjusted estimates and their precision (eg, 95% confidence interval). Make clear which confounders were adjusted for and why they were included<br><hr/> (b) Report category boundaries when continuous variables were categorized<br><hr/> (c) If relevant, consider translating estimates of relative risk into absolute risk for a meaningful time period | Tables.<br>P10<br>stat.methods<br><br>-<br><br>- |
| 54<br>55<br>56<br>57<br>58<br>59<br>60                                                                                                 | Other analyses   | 17  | Report other analyses done—eg analyses of subgroups and interactions, and sensitivity analyses                                                                                                                                                                                                                                                                                                                            | P 10 Stat methods/p 12                           |
| <b>Discussion</b>                                                                                                                      |                  |     |                                                                                                                                                                                                                                                                                                                                                                                                                           |                                                  |
|                                                                                                                                        | Key results      | 18  | Summarise key results with reference to study objectives                                                                                                                                                                                                                                                                                                                                                                  | P13                                              |
|                                                                                                                                        | Limitations      | 19  | Discuss limitations of the study, taking into account sources of potential bias or imprecision. Discuss both direction and magnitude of any potential bias                                                                                                                                                                                                                                                                | P13-14                                           |
|                                                                                                                                        | Interpretation   | 20  | Give a cautious overall interpretation of results considering objectives, limitations, multiplicity of analyses, results from similar studies, and other relevant evidence                                                                                                                                                                                                                                                | P14-15.                                          |
|                                                                                                                                        | Generalisability | 21  | Discuss the generalisability (external validity) of the study results                                                                                                                                                                                                                                                                                                                                                     | P15                                              |
| <b>Other information</b>                                                                                                               |                  |     |                                                                                                                                                                                                                                                                                                                                                                                                                           |                                                  |
|                                                                                                                                        | Funding          | 22  | Give the source of funding and the role of the funders for the present study and, if applicable, for the original study on which the present article is based                                                                                                                                                                                                                                                             | Page 2.<br><br>-                                 |

\*Give information separately for exposed and unexposed groups.

**Note:** An Explanation and Elaboration article discusses each checklist item and gives methodological background and published examples of transparent reporting. The STROBE checklist is best used in conjunction with this article (freely available on the Web sites of PLoS Medicine at <http://www.plosmedicine.org/>, Annals of Internal Medicine at <http://www.annals.org/>, and Epidemiology at <http://www.epidem.com/>). Information on the STROBE Initiative is available at <http://www.strobe-statement.org>.

For peer review only
